# Supplementary material for: Estimation of groundwater age distributions from hydrochemistry: Comparison of two metamodelling algorithms in the Heretaunga Plains aquifer system, New Zealand
Source: Copernicus journal article supplement (doi:10.5194/hess-2022-258), 2022-08-31
Supplement: Supplementary file 1 [file SM_Tables_S2_S3.xlsx]

## Sheet: Table_S2
Sample information					Hydrochemistry																					Percentiles in age distribution from LPMs (years)									SR unchained - Predicted median age @ percentile (years)									SR chained - Predicted median age @ percentile (years)
Site_ID	MapID	NZTM_E	NZTM_N	Bore Depth (m)	Ca	Mg	Na	K	HCO3	Cl	SO4	Fe	Mn	SiO2	B	F	DRP	NO3N	NH3N	PHLAB	Temp	DO	ECLab	d18O	dD	5	10	20	33	50	66	80	90	95	5	10	20	33	50	66	80	90	95	5	10	20	33	50	66
16383	1	1.93497e+06	5.60316e+06	146.7	113	10.7	37.4	3.5	350	48	24	0.44	0.012	23	0.03	0.09	0.018	0.970655	0.005	7.3	15.2	1.2	754	-6.34	-38.9	4.8	7.8	14.4	23.8	37.8	53.4	69.8	83.6	91.4	12.1572	12.3105	12.944	22.0463	28.6362	42.7382	59.5279	69.5273	80.7991	7.40879	8.41404	13.0938	22.2132	30.9174	49.2835
5915	2	1.92907e+06	5.61086e+06	37.8	17.4	4.1	10.34	1.39	76	7	9.6	0.09	0.073	23	0.112	0.12	0.063	0.0277652	0.05	7.6	14.6	0.2	167	-7.95	-49.2	3.2	3.4	3.6	4.2	5	7.2	45.6	55	64	12.1572	13.4652	16.3327	20.4048	25.411	30.0162	42.3452	54.9396	58.1651	7.19412	8.77058	15.4458	19.5709	24.3421	28.7512
2502	3	1.92984e+06	5.61117e+06	46.9	19.9	3.4	9.9	1.4	78	7.4	10	0.01	0.00025	19.5	0.112	0.11	0.025	0.0474041	0.005	7.8	14.6	3.7	168	-7.94	-48.7	3.2	3.4	3.6	4.2	5	7.2	45.6	55	64	11.6742	4.08526	3.80104	6.88463	9.96476	16.5664	29.7346	41.9889	51.1545	2.78301	3.02322	3.83568	4.79531	9.36941	16.4089
4362	4	1.90478e+06	5.61323e+06	15.5	16.2	9.9	14.52	2.8	57	10.7	27	0.01	0.00025	30	0.013	0.08	0.02	1.28668	0.005	7.1	17.3	8.3	235	-7.23	-46	2.6	2.6	2.8	3.2	3.6	4.4	6.2	46.6	55.8	11.6742	4.46762	4.46931	0.1	0.640978	1.34693	2.37961	44.2322	54.634	2.66582	3.04644	3.64837	3.36494	3.45621	6.1216
15006	5	1.92635e+06	5.60916e+06	30.2	19.8	2.9	9.57	1.51	75	6.8	10	0.09	0.005	18.4	0.117	0.09	0.045	0.0370203	0.005	7.2	15	3.4	162	-7.66	-47.4	2.6	2.6	2.8	3.2	3.6	4.4	6.2	46.6	55.8	11.6742	4.77827	5.4875	6.18536	11.7641	15.5413	21.36	39.0023	49.6934	2.9144	3.71075	4.5708	4.31653	11.3396	16.6828
844	6	1925640	5612874	12.97	18.3	2.8	9.68	1.22	68	7.1	9.8	0.01	0.00025	16.5	0.116	0.13	0.024	0.0331828	0.005	7.4	14.6	6.6	155	-7.65	-47.8	3.2	3.2	3.4	3.8	4.4	5	6.2	8	33.4	11.6742	3.33424	2.64504	4.99681	7.44452	13.7164	22.2527	26.4307	44.4153	2.57551	2.4017	3.1282	3.28582	5.12089	13.0708
15465	7	1.92414e+06	5.60275e+06	14.85	53	11	47.3	6.2	290	45	0.7	5.9	1.19	44	0.09	0.22	0.73	0.00880361	3.2	7.1	15.8	0.17	572	-7.05	-47	4.8	6.4	39	41.6	46.2	52	60	69.8	78.6	12.1572	13.4842	38.8736	44.1324	48.8693	54.9033	61.4686	78.2715	87.6165	7.1845	8.86577	38.8715	45.432	49.2734	57.199
5988	8	1.92414e+06	5.60275e+06	109	57	15.7	41.8	3.3	210	52	25	0.01	0.0005	21	0.075	0.13	0.008	1.3544	0.005	7.5	14.7	0.66	590	-6.67	-43.4	10.8	11.8	14.2	17.6	23.4	31	41.2	54	66	12.1572	12.6152	12.6887	16.3722	25.0576	31.3188	41.389	51.4783	58.3	6.96815	8.09725	11.5369	15.9886	23.1989	30.8665
5690	9	1.92377e+06	5.61545e+06	14.7	55	5.3	14.3	2.1	187	10.9	17.8	0.06	0.094	16.4	0.043	0.17	0.034	0.0189616	0.005	8.1	14.7	0.08	359	-7.67	-48.3	3.4	3.8	4.6	5.8	7.8	10.4	13.8	18.6	23.2	12.1572	13.4652	9.54752	14.8038	14.8037	20.6425	28.8969	31.096	36.5603	5.96085	5.61411	7.7026	12.3499	11.1312	15.588
15012	10	1.92838e+06	5.60387e+06	114.5	35	4.2	18.59	3.5	159	10.1	0.25	0.18	0.22	39	0.141	0.1	0.96	0.0767494	1.3	7.9	13.7	0.18	288	-8.18	-52.5	53.2	55.4	59.8	66	74	82.2	89.4	94.8	97.4	53.6612	55.6925	61.1969	66.1077	76.9522	85.1559	93.3521	98.371	98.4164	55.0474	57.3324	61.8073	66.9878	77.6041	85.7414
15884	11	1.92471e+06	5.61938e+06	10.39	69	5.5	14.74	1.96	220	16	18.8	0.01	0.001	19.2	0.049	0.15	0.027	0.0155756	0.005	7.6	15.3	0.12	420	-7.02	-43.7	1.8	2.2	3.2	4.4	6.4	9.2	13	18	23	12.1572	11.0061	6.07788	9.34481	11.7586	16.4678	23.6402	28.4555	32.1703	4.1388	4.51815	4.91197	6.17513	8.87566	11.4385
2580	12	1935702	5604421	12	28	3.3	12.65	1.61	96	10.2	10.8	0.01	0.0015	15.3	0.033	0.09	0.026	0.0564334	0.005	6.8	14.8	4.4	208	-6.25	-38.26	0.8	1	1.2	1.6	2	2.8	4	5.4	6.8	11.6742	3.68152	3.65039	6.05915	9.29617	15.1298	18.8096	19.8726	26.4773	2.18873	2.39893	3.08834	3.60269	5.93729	7.7784
16202	13	1933732	5606791	11.2	28	3.7	14.52	2.1	105	10.4	11.9	0.1	0.0061	20	0.035084	0.126765	0.049	0.10158	0.013	7.4	15.2	1.02	234	-7.75	-49.6	39.2	40	41.8	44.8	49.4	55.4	63.4	73	81.6	13.0561	16.5985	18.761	27.7683	27.6029	38.8646	39.305	52.5656	62.7972	13.8646	19.3601	21.2485	29.9748	29.3343	37.9405
16203	14	1933736	5606797	21.56	17.7	3.6	10.67	1.19	74	6.1	9.9	0.08	0.0019	17.5	0.0935196	0.126765	0.023	0.0435666	0.005	7.9	14.4	1.1	164	-7.6	-47.36	2.8	3.4	5	44.2	50	57.2	66.6	77.4	85.8	12.1572	5.3769	4.27334	14.2429	22.3016	28.4478	39.28	48.8835	54.634	3.60237	4.33037	4.54522	15.0798	27.7225	39.6088
16300-J-1	15	1924843	5610616	126.5	200	168	3630	67	600	6400	2	8.1	1.16	21	0.0935196	0.280628	0.15	0.000225734	46	7.5	15.8	0.36	18680	-5.61	-33.17	56.4	58	61.4	66.2	73	80.2	87.6	93.4	96.6	56.1601	57.8059	60.5163	65.4908	73.3764	81.2863	89.7321	91.6807	93.8537	57.8125	59.1703	62.2053	67.0144	74.1994	81.3722
16360	16	1.92483e+06	5.61062e+06	65.31	18.1	2.9	10.12	1.08	69	6.5	9	0.01	0.0009	16.9	0.117	0.14	0.012	0.0496614	0.005	7.6	15.1	5.6	152	-7.81	-51.3	2.4	2.6	3	3.6	4.8	7	34.8	46	56.8	11.6742	2.70911	0.1	1.26675	3.00706	5.11015	15.0046	24.167	44.4867	2.32334	1.65149	2.13085	2.59292	4.21394	7.85613
16361	17	1.92483e+06	5.61062e+06	23.94	19.1	2.8	9.68	1.22	70	7	9.8	0.01	0.0014	18.1	0.118	0.12	0.018	0.0541761	0.005	7.2	15.8	3.58	158	-7.68	-49.6	3.2	3.2	3.4	3.8	4.2	4.8	5.8	6.8	8	11.6742	3.34796	0.634709	0.1	0.1	1.90199	7.41852	10.6565	16.1102	1.27897	1.46029	1.10317	2.21333	1.29801	2.03916
10496	18	1935135	5603000	8.3	72	7.9	28.6	3.2	220	37	35	0.04	0.0037	23	0.01	0.126765	0.025	0.609481	0.02	7.1	15.8	0.6	541	-6.72	-43.6	1.8	2.2	3.2	4.4	6.4	9.2	13	18	23	12.1572	13.4652	12.6545	15.1276	18.0385	24.5098	27.9384	33.5134	47.3349	6.63449	7.29767	9.83172	12.5303	14.2258	20.8627
3336	19	1928379	5603871	48.1	37	7.9	19.69	2.2	130	18.9	17.7	0.01	0.049	21	0.0319116	0.126765	0.017	1.21896	0.005	7.7	14.2	0.1	339	-7.36	-47.5	31.8	32.2	33.2	34.6	37.2	40.4	44.8	50.6	56.4	12.1572	13.7812	16.485	21.9369	27.3627	30.437	37.654	48.2946	55.197	7.40729	10.5675	16.3414	20.745	25.8616	29.4677
413	20	1936994	5620244	85.34	27	2.6	14.41	2	121	6.5	2.8	0.03	0.048	31	0.0935196	0.189101	0.52	0.00225734	0.186	8.1	15.1	0.04	215	-8.08	-53	56.4	58	61.4	66.2	73	80.2	87.6	93.4	96.6	57.0216	57.4765	60.5884	64.9274	69.8822	77.7411	84.2005	90.1516	93.2705	58.504	59.0413	62.5335	66.9928	71.7511	79.8233
705	21	1930388	5607410	40.5	17.2	3.7	10.34	1.94	87	6.2	2.8	0.05	0.058	29	0.0935196	0.179747	0.095	0.00722348	0.38	7.8	14.5	0.2	162	-7.75	-49.1	31.8	32.2	33.2	34.6	37.2	40.4	44.8	50.6	56.4	30.2418	32.1781	31.2862	36.4013	43.1556	42.9496	47.9247	57.9771	61.4014	33.7104	36.1219	34.435	38.6923	42.0942	42.0576
15022	22	1935268	5612897	37.78	21	3.2	10.67	1.67	91	6	7.1	0.09	0.047	22	0.0935196	0.146746	0.069	0.0295711	0.074	8	14.2	0.13	176	-7.79	-50.5	31.8	32.2	33.2	34.6	37.2	40.4	44.8	50.6	56.4	31.0897	24.3294	23.9166	30.7306	35.8386	38.1354	46.7507	55.5478	58.547	28.9804	30.1989	29.7802	33.8072	35.6826	39.2811
15003	23	1935268	5612897	57.8	23	2.8	10.56	1.55	88	5.9	10.4	0.07	0.0058	18.9	0.0935196	0.126765	0.042	0.0496614	0.01	8	13.9	0.09	180	-7.64	-49.5	2.2	3.2	6.8	24.6	28	32.4	38.6	46.4	54.4	12.1572	13.4652	11.8973	22.4694	28.0527	32.162	40.5993	48.4372	54.723	6.96213	7.91604	10.5553	22.5462	26.4198	30.6847
15002	24	1935268	5612897	89.6	19.1	2.9	10.23	1.38	76	6.2	8.7	0.01	0.0029	16.7	0.0935196	0.126765	0.029	0.0451467	0.067	8.5	13.9	2.24	164	-8.23	-50	2.2	3.2	6.8	24.6	28	32.4	38.6	46.4	54.4	11.6742	6.15826	9.36502	24.5193	28.4233	32.5794	43.0329	46.0764	54.723	4.18458	5.54619	8.6715	26.3672	29.3192	32.0166
1191	25	1919583	5606896	20.8	45	8.4	23.1	2.6	155	22	17.5	0.01	0.0006	25	0.0120185	0.126765	0.022	1.82844	0.005	7.4	15.8	6.05	404	-7.53	-49.8	3.4	3.6	4	4.8	5.8	7	9	11.4	13.8	12.1572	5.52274	8.49647	7.56578	12.5708	15.3387	20.8346	28.4753	28.7607	3.34871	3.99251	5.89044	4.63435	9.82823	10.1119
8521	26	1923104	5605948	30.47	32	4.6	21.89	1.94	114	22	15	0.01	0.0031	21	0.0458265	0.126765	0.011	0.564334	0.005	7.4	15.2	4.02	302	-7.72	-50.6	3.4	3.6	4	4.8	5.8	7	9	11.4	13.8	11.6742	4.64899	3.97376	5.34269	10.4522	14.6426	17.3966	19.2488	22.477	2.2645	2.82626	2.75729	2.84171	6.80554	7.04129
10340	27	1922964	5609399	16.5	22	3.2	10.89	1.82	79	9.1	12.2	0.07	0.0022	17.1	0.0492661	0.126765	0.005	0.171558	0.005	7.3	14.8	3.51	189	-7.54	-48.5	0.1	0.1	0.1	0.2	0.5	0.8	1.2	1.8	2.4	11.6742	3.13724	0.1	3.43489	3.80169	5.78483	8.17497	9.23448	6.51736	1.15192	1.09224	0.635627	2.31561	2.1501	1.51046
1799	28	1935927	5608503	41.76	16.9	3.3	10.56	1.21	75	7.1	9.5	0.02	0.023	13.2	0.0935196	0.178162	0.009	0.000225734	0.014	7.2	14.2	0.17	160	-7.83	-49.7	2.8	3.2	4.6	23.4	26.6	31.2	37.2	45.2	53	12.1572	5.73626	4.21859	19.0722	20.2427	23.0055	30.282	42.3628	52.626	3.72988	4.62605	4.77832	21.4589	25.9086	28.8701
222	29	1936827	5615561	59	22	1.83	10.56	1.32	88	6.6	8.3	0.01	0.022	19.3	0.0935196	0.151635	0.111	0.0115124	0.079	8	13.8	0.09	176	-7.84	-50.1	44.4	45	46.4	48.2	51.4	55.6	61.4	68.6	75.6	43.5155	37.4891	33.9967	37.8518	45.2773	48.6847	59.5134	64.8439	69.5406	42.9935	43.2506	39.8903	41.5635	45.3361	50.6712
15795	30	1923397	5613906	37.65	15.8	7.1	539	7.8	300	710	0.25	0.35	0.032	25	0.0935196	0.126765	0.27	0.0744921	6.5	8.1	14.7	0.09	2690	-7.24	-45.8	92.4	92.8	93.6	94.6	96	97.4	98.4	99.4	99.8	88.2779	94.7402	94.6032	92.8339	96.0414	94.8635	97.4839	94.0553	96.9411	92.613	94.573	93.9218	94.6278	96.9957	95.7736
1674	31	1928677	5608418	30	19.4	3.2	10.01	1.27	77	6.3	9.7	0.01	0.00025	18.2	0.0935196	0.126765	0.019	0.0970655	0.005	7.4	14.4	4.96	168	-8.23	-53.2	0.05	0.05	0.05	0.1	0.15	43.2	48.8	56	63.2	11.6742	3.58203	2.93944	6.33361	7.9802	21.3812	30.0827	39.4126	48.3927	2.90447	2.71487	3.26235	3.59607	6.82132	29.8189
15011	32	1924123	5605229	114	24.8	3.4	13.42	1.2	84	20	7.6	0.0045	0.0005	17.4	0.0935196	0.126765	0.021	0.029	0.005	7.8	14.7	0.673727	218	-7.82	-49.2	3.4	3.4	3.6	4	16.4	34.4	55.8	75	86.6	12.1572	6.45395	5.77383	9.18461	13.9839	26.3148	39.28	50.695	55.7355	4.11751	4.76371	5.02326	6.20996	14.03	29.9896
T1	33	1931956	5617103	89.92	22.5	1.9	12.1	1.4	59	6.9	9.1	0.014053	0.04	17.6	0.1095	0.15	0.1	0.02	0.04	8.1	14.5	0.51332	178	-7.97667	-51.59	4.8	6.4	11.6	21	25.2	30.8	38.6	48.6	58.6	12.1572	13.2728	17.9905	23.8749	33.1778	39.0515	47.5312	54.9868	62.0461	6.74744	8.39815	15.7167	21.6683	30.5028	36.53
T2	34	1931078	5616761	46	25.5	2.16	13.09	1.48	74	10	8.25	0.005	0.005	18.7	0.113	0.14	0.093	0.12	0.02	8	14.9	3.05573	203	-7.9	-51.3	13	14.8	19	25.8	39.4	55.6	67.2	79.4	88	11.9344	8.57148	15.0292	19.9727	30.8209	37.2544	43.6278	55.4017	61.0937	6.16799	9.80171	14.6696	19.356	29.656	36.6966
T2	35	1931078	5616761	46	24.8	2.2	13.2	1.5	64	9	7.5	0.03	0.0011	17.4	0.089	0.155	0.1	0.017078	0.02	8.05	14.8	0.521142	196	-7.9375	-51.45	4.8	6	9.2	15.8	20.6	27.2	36.8	49.2	61.2	12.1572	13.4936	16.8073	20.8106	28.2522	37.1968	44.9231	54.9765	60.7571	7.28363	8.97926	15.6047	19.7211	26.6716	34.8322
T3	36	1930381	5615467	42.85	22.1	2.12	10.857	1.2	61	9	8.9	0.005	0.005	17.8	0.112	0.13	0.048	0.16	0.01	8.1	14.3	3.31359	178	-7.8	-49.3833	3.4	4.4	7	17.8	20.6	24.4	29.6	36.6	43.6	11.6742	4.64713	7.12181	13.7733	24.0041	28.66	36.5714	41.2785	52.7194	3.40495	4.52504	6.37324	12.9591	24.6042	29.1207
T4	37	1932076	5617848	41	23.4	2.2	14.3	1.7	63.1	8.5	8	0.21	0.05	20.5	0.112	0.18	0.13	0.00734867	0.16	8	15.2	0.51332	195	-7.76045	-50.4684	18.4	19.6	22.4	26.6	33.4	42.2	53.8	67.4	78.6	16.6231	16.8615	26.2216	30.1152	39.774	45.7397	51.2322	63.9437	69.1359	13.3612	18.4497	25.6377	30.5711	38.3612	44.6248
T4	38	1932076	5617848	41	15.5	4.5	38.5	1.7	148	10	1.6	0.04	0.217	21	0.112	0.18	0.141	0.001	0.23	7.8	15.2	0.51332	259	-7.84611	-51.8369	14.2	14.6	15.4	16.6	18.8	21.4	25	29.8	34.6	17.2703	16.9727	25.944	26.5569	27.5569	32.818	39.8816	49.0916	56.4646	13.2092	18.7147	25.185	27.8441	26.4208	32.7716
T5	39	1931610	5616285	51.2	22.8	1.74	10.252	1.29	62	7	9.44	0.005	0.005	18.1	0.109	0.14	0.06	0.12	0.01	8	14.5	2.44214	174	-7.84	-49.4633	2	2.2	3	5.2	22.8	25.2	28.4	32.8	37	11.6742	5.51945	6.89762	11.9477	23.5346	27.0045	34.6882	41.3454	51.501	3.46272	4.63893	5.9252	10.2532	23.9589	27.1173
T6	40	1931425	5615478	74.5	22.8	1.64	15.07	1.8	61	7	8.89	0.005	0.005	18.8	0.108	0.13	0.059	0.16	0.01	8.1	14.4	2.45789	171	-7.64	-49.4	2.2	2.8	4	7	22.8	25	28	31.8	35.8	12.1572	6.37878	7.57875	14.4151	27.6029	29.6913	36.0596	42.5231	52.6598	4.22947	5.29907	6.67364	12.939	27.0033	29.2353
T7	41	1931335	5616435	45.9	22.4	2.2	12.21	1.5	59	8.4	7.2	0.25	0.0994	18	0.127	0.14	0.062	0.017	0.03	7.9	14.5	0.51332	239.42	-7.80667	-50.2	9.2	14	16.8	18	20	22.8	26.6	31.8	37	12.1572	13.4652	14.1568	21.4101	27.4754	32.918	37.5386	46.4028	54.723	7.02032	9.51734	14.0691	20.5844	25.8732	29.8226
TAN	42	1933360	5617622	64.3	22.8	1.7	12.1	1.5	61	6.2	7.4	0.07	0.029441	20	0.0935196	0.126765	0.139	0.11	0.17	8.2	16.9	0.51332	182	-7.82667	-49.995	5.8	7	9.8	15.6	26	30	35.2	42.2	49.2	12.1572	14.2033	20.6558	22.1058	28.5524	31.4775	34.7766	46.5377	52.8269	9.16363	12.2279	17.8314	21.1097	26.6067	29.4805
A1	43	1935753	5616116	90	24.1	1.91	11.22	1.61	72	6	5.87	0.012	0.061	22.4	0.109	0.16	0.225	0.01	0.288	8	13.9	0.51332	184	-7.91	-50.1	12.4	14.6	19.8	29.4	50.6	58.6	68.8	79.8	87.8	20.4389	19.5899	32.3119	42.5255	55.16	64.7214	76.3451	84.1283	90.3967	17.7271	18.9682	33.0943	41.5847	56.1817	65.6951
C1	44	1934095	5618936	88.5	22.7	2.65	13.53	1.46	75	8	4.29	0.005	0.066	21.5	0.105	0.18	0.192	0.01	0.288	7.9	14.7	0.51332	194	-8.05	-52.4	10.2	15.6	42.4	49	58.8	69.4	80.4	89.6	94.6	15.8938	19.1553	34.2985	40.5958	51.5256	59.0573	70.6665	79.4951	84.4928	13.2332	18.229	35.0543	41.2119	51.705	58.9571
Pakipaki	45	1925137	5599411	35	20.9	8.9	66	5.8	124	50	15	0.29	0.1605	25.5938	0.01	0.178177	0.14	0.025	0.35	7.8	15.1	0.51332	469	-6.92502	-45.9402	75.4	76.6	78.8	81.8	86	90.2	94.2	97	98.6	61.3091	63.2459	63.9851	70.2933	75.8699	81.357	86.098	90.8683	93.2625	64.2038	64.6136	66.9069	72.3317	77.2678	82.6277
Pakipaki	46	1925137	5599411	35	20.9	8.9	66	5.8	124	50	15	0.29	0.1605	25.5938	0.01	0.178177	0.14	0.025	0.35	7.8	14.9	0.51332	469	-7.2	-46.5	45.4	47.6	52.4	58.8	67.8	77.2	86	92.8	96.4	60.7107	62.1199	63.3484	68.9464	76.0323	82.1328	87.9224	90.9654	93.6665	62.6827	63.2646	66.2267	70.9301	77.1782	83.1027
Eastbourne 1	47	1930117	5604260	72.1	30.8	5.17	13.97	1.45	88	17.7	12.2	0.02	0.008	17.7	0.077	0.09	0.044	2.72	0.01	7.7	14.6	0.566403	291	-7.61	-48.5	13	22.4	24	26.4	30.4	35.6	43	52.8	62.6	12.1572	16.0681	20.0625	21.4398	28.2438	35.0649	41.7028	52.1043	57.9689	13.3283	18.2314	20.6986	22.3042	27.6276	33.1831
Eastbourne 2	48	1930020	5604424	114.3	30.4	5.55	14.41	1.51	88	15.8	13.2	0.021	0.008	17.9	0.078	0.09	0.037	2.68	0.01	7.7	14.7	0.566403	286	-7.43	-47.3	13	22.4	24	26.4	30.4	35.6	43	52.8	62.6	12.1572	15.1222	18.2022	21.3448	26.6722	32.5642	39.8681	50.6357	56.522	12.935	21.2513	20.5205	22.5715	26.7049	31.5038
Eastbourne 3	49	1929954	5604508	76	30.2	5.35	13.86	1.44	85	15.5	11.9	0.024	0.001	19.1	0.081	0.09	0.033	2.77	0.01	7.8	14.6	5.03061	275	-7.52	-49.2	5.8	11	18.2	20.2	23.2	27.2	32.8	40	47.4	11.6742	9.06477	16.485	17.0171	24.0664	29.3847	37.6212	46.1	54.1493	6.24087	10.0111	16.3874	16.8243	23.1099	27.713
Eastbourne 4	50	1929905	5604583	81	28.4	5.59	13.75	1.39	83	14.1	12.5	0.041	0.001	19.3	0.086	0.1	0.025	2.61	0.01	7.6	14.7	5.08471	270	-7.42	-47.6	5.8	11	18.2	20.2	23.2	27.2	32.8	40	47.4	11.6742	7.60472	14.7673	14.8337	20.6942	24.7289	32.286	43.6686	49.5666	5.04036	8.63866	15.7262	15.7712	20.567	23.9933
Eastbourne 5	51	1929850	5604643	85.5	27	5.14	12.65	1.3	81	13.9	12	0.029	0.001	19.5	0.083	0.1	0.032	2.38	0.01	7.7	14.6	5.14081	258	-7.44	-48.7	5.8	11	18.2	20.2	23.2	27.2	32.8	40	47.4	11.6742	6.66646	15.6738	16.1774	22.9738	28.3106	36.3691	46.1	53.742	4.58263	8.53707	16.2322	16.7088	22.1737	27.2663
Lyndhurst 5	52	1929230	5607178	63.4	17.8	3.28	9.328	1.04	57	7.6	9.87	0.036	0.001	18.9	0.099	0.12	0.016	0.25	0.01	7.7	15.5	4.34407	170	-7.93	-50.3	1.4	1.6	2.4	2.8	5.2	6.2	14	22.4	31	11.6742	3.34124	2.02145	4.11651	6.11094	7.3031	14.3152	17.7255	20.688	1.8087	1.79881	2.07034	2.72971	3.72762	3.95641
Lyndhurst 7	53	1930113	5604298	67	182	3.5	10.23	1.2	73	6.8	8.8	0.021	0.00053	18.5	0.111	0.12	0.008	0.25	0.01	7.7	15.3	4.67355	161	-7.92	-51.48	1	1.2	1.6	2.2	3.2	5	7.8	12	16.4	12.1572	3.25818	0.510116	2.65729	3.4115	4.99561	10.7018	11.1356	14.7407	1.68688	1.47834	1.14949	2.37978	2.35429	2.39435
Lyndhurst 7	54	1929112	5607300	67	17.5	3.13	9.218	0.97	59	7.62	10.1	0.038	0.001	18.7	0.097	0.12	0.014	0.28	0.01	8	15.2	5.93538	168	-7.85	-48.4	1.4	1.6	2.4	3.4	5.2	8.4	14	22.4	31	11.6742	3.09705	1.29936	5.12117	7.90701	9.1185	15.8583	17.057	22.9798	1.86191	1.64315	1.82242	3.48374	4.87357	5.53995
Wilson NEW	55	1925742	5606617	48.2	19.8	2.78	8.899	0.99	58	7.44	11.2	0.048	0.001	17.7	0.104	0.1	0.021	0.41	0.01	7.7	15.3	4.3109	176	-7.6	-49.5	0.8	0.8	1	1.2	1.6	2	2.6	3.4	4.2	11.6742	3.1425	2.71108	5.56552	8.36426	10.7811	16.9669	17.8533	21.253	1.92581	1.91135	2.40889	3.2448	5.06281	4.87738
Portsmouth Rd	56	1924043	5606952	48	20.2	2.9	9.548	1.01	58	8.41	10.6	0.056	0.001	16.8	0.108	0.1	0.015	0.29	0.01	7.6	15.2	5.98192	179	-7.71	-48.3	1.4	1.4	1.4	1.6	1.8	2	2.4	2.8	3.4	11.6742	3.08647	1.81628	4.91813	7.42908	9.61728	13.328	12.8728	18.0766	1.68036	1.62668	1.92071	2.83158	3.73639	3.96063
Omahu 1	57	1923223	5611904	12.2	25.3	3.53	11.33	1.32	73	13.4	13.4	0.032	0.001	19.1	0.102	0.1	0.022	0.11	0.01	7.6	16.9	5.38779	229	-7.31	-47.8	0.05	0.05	0.05	0.1	0.1	0.1	0.1	0.15	0.15	11.6742	3.57182	2.83342	0.1	1.17963	0.1	2.07655	4.13034	0.641984	1.33999	0.995422	0.825038	0.869177	0.1	0.1
Omahu 2	58	1923223	5611904	12.2	24.7	3.45	10.912	1.29	72	13.3	13.3	0.039	0.001	18.8	0.105	0.1	0.022	0.11	0.01	7.6	16.9	7.46	227	-7.44	-47.3	0.05	0.05	0.05	0.1	0.1	0.1	0.1	0.15	0.15	11.6742	3.42165	2.34016	0.1	2.10535	0.1	0.1	0.1	0.851765	1.34557	0.807309	0.890263	0.943068	0.1	0.361338
Omahu 2	59	1923223	5611904	12.2	19	2.7	10.45	1.3	48	8.2	10.8	0.01	0.00053	17.6	0.098	0.11	0.017	0.13	0.005	7.6	15.9	7.46	169	-7.6525	-48.9825	0.01	0.01	0.01	0.01	0.01	0.1	0.1	0.15	0.15	11.6742	2.98872	0.204921	0.1	0.1	1.65444	4.27979	1.9211	7.51861	0.733735	0.611881	0.793295	1.48516	0.257283	1.27729
Brookvale 1	60	1935190	5603357	22	51	5.5	19.69	2.1	108	22	18.95	0.01	0.00053	20.0127	0.0354156	0.126765	0.015	1.97	0.005	7.3	16.4	5.43861	373	-6.66	-40.72	0.05	0.1	3.2	3.4	4	4.6	5.6	6.6	7.8	11.6742	4.28809	3.4799	1.36173	4.42583	4.84405	6.63209	12.4162	13.9788	1.50203	2.20801	2.14052	1.5455	2.36122	2.4197
Brookvale 3	61	1934988	5603184	35	44.3	4.93	17.16	1.86	116	20.8	19.2	0.018	0.001	18.1	0.013	0.08	0.022	1.95	0.01	7.2	15.8	4.38015	370	-6.53	-39.5	0.05	0.05	0.05	0.1	17.4	24	33.2	44.8	56.2	11.6742	4.83494	5.5804	7.49573	12.6954	16.6387	20.1785	30.0133	44.4445	2.84567	3.65505	4.46659	4.98205	12.3907	16.7467
Napier Rd	62	1933818	5604468	36.5	32	2.8	14.96	1.8	77	14.7	9.6	0.1505	0.053	18.5284	0.0935196	0.152258	0.205	0.025	0.28	7.9	13.9	0.51332	239	-7.66	-50.2	37	39	43.2	49.2	58.2	68.4	79.2	88.6	94	34.2704	28.9657	38.6771	47.6883	57.5789	69.2925	79.083	86.9343	90.9425	32.9394	34.6484	40.44	49.1902	58.4441	70.1305
Waipatu	63	1932393	5606249	35	15.7	3.07	9.559	1.07	59	7.33	9.53	0.029	0.001	18.1	0.084	0.13	0.036	0.27	0.01	7.8	14.9	4.27858	171	-7.53	-47.6	5	6	8.2	12.8	21.6	26.2	32.4	40.6	48.8	11.6742	3.8863	5.48002	10.0408	16.7504	20.3695	27.7365	37.0467	45.8374	3.01255	3.56276	5.17981	9.53836	17.9114	22.1087
Whakatu	64	1934536	5608845	35	18	3.07	9.735	1.02	58	6.97	9.19	0.092	0.001	18.4	0.092	0.11	0.041	0.3	0.01	7.9	14.3	4.3109	168	-7.73	-49.1	3.4	4.2	6.2	14.8	27.6	32	37.8	45.6	53.2	11.6742	4.10787	6.64122	13.6857	21.8435	28.0955	36.3128	45.8116	55.5768	3.46586	4.3275	6.1408	13.2967	24.8449	31.5419
Whakatu NEW	65	1934503	5608855	40.5	17.2	2.86	9.79	0.97	58	6.97	9.11	0.127	0.003	17.7	0.131	0.11	0.043	0.27	0.01	7.9	14.1	3.01755	164	-7.84	-48.8	3.4	4.2	6.2	14.8	27.6	32	37.8	45.6	53.2	11.6742	4.42054	7.39753	15.0577	24.6269	30.0838	37.8527	46.1986	55.2838	3.55188	4.7133	6.59207	14.7934	26.1351	31.0745
Tucker Lane	66	1936394	5610730	48	19.8	3.78	10.472	1.14	67	7.91	9.67	0.12	0.001	17.7	0.119	0.11	0.03	0.26	0.01	7.8	14.6	5.60138	189	-7.63	-48.2	5.4	6.4	9	19	28.4	33.2	40	48.8	57.6	11.6742	3.9904	5.61586	11.5812	19.0873	22.688	30.7631	38.968	49.2725	3.14273	3.68725	5.66721	11.3433	23.88	27.7725
Ferry Rd	67	1936636	5611356	47	19.2	3.97	10.758	1.19	67	8.4	9.78	0.057	0.002	17	0.115	0.11	0.023	0.13	0.01	7.8	14.4	4.46624	190	-7.68	-46.4	7.6	8.2	9.6	13.4	33.4	38.8	46	55.4	64.6	11.6742	3.50256	5.04625	11.5083	18.8494	22.6471	30.3993	38.7913	49.2632	3.14507	3.48055	5.44376	11.5819	26.3654	28.646
Haumoana well 2	68	1939099	5608127	24.5	20.3	2.29	11.33	1.74	70	6.97	6.25	0.046	0.173	24.2	0.096	0.15	0.313	0.01	0.45	7.9	14.3	0.51332	186	-8.06	-51.1	21.2	26.2	40.8	49.4	57.6	67	77.6	87.4	93.2	25.829	23.9255	41.0921	49.3325	57.9866	69.9491	79.2273	89.9446	92.2457	24.2582	28.1378	42.0222	50.0233	59.4245	70.3095
Beach Rd	69	1939099	5608127	64.6	20.3	2.24	11	1.64	67	7.14	7.51	0.042	0.147	21.4	0.095	0.13	0.215	0.01	0.35	7.9	14.4	0.51332	180	-8.03	-49.7	16	19.6	31.2	44	51	59.8	70.6	81.8	89.6	21.1698	21.785	33.3012	43.6732	51.9925	60.7665	71.5972	82.0602	87.6492	22.8863	26.4407	34.898	44.9171	53.12	62.2043
Beach Rd	70	1939099	5608127	64.6	22	2.5	11.88	1.8	62	6.9	6.85	0.032	0.141	21	0.0935196	0.155004	0.2	0.025	0.35	7.8	14.8	0.51332	179	-7.9425	-50.5275	33.6	35.4	39.2	44.6	53.2	63.2	74.6	85.4	92	26.5862	23.5686	34.3067	41.871	49.2616	58.2326	69.0905	78.4043	84.2778	25.2223	28.7102	35.865	43.1895	50.1406	59.8645
Parkhill Rd	71	1938929	5606999	37	34.6	4.11	13.31	1.8	100	13.4	12.5	0.029	0.001	19.9	0.02	0.1	0.034	0.76	0.01	7.9	14.7	4.67804	285	-6.83	-41.4	2.4	3	4.4	7.6	17	26.6	40	56.4	70.4	11.6742	4.97868	8.44647	13.2886	22.2244	27.2358	34.2679	44.4166	53.1762	3.49171	4.4667	7.18986	12.3299	22.7997	28.4864
Hospital	72	1928313	5606442	51	17.6	3	8.833	1.07	60	7.4	9.1	0.05	0.001	18.9	0.11	0.11	0.016	0.24	0.01	7.5	15.7	4.24707	169	-7.8	-49.66	2.4	2.4	2.4	2.6	2.8	3	3.2	3.6	4	11.6742	3.10869	1.48677	2.70773	4.10689	4.52843	9.68616	13.9357	15.7113	1.5187	1.55418	1.50296	2.28957	2.51995	2.70818
Hospital	73	1928313	5606442	51	19.3	3.4	10.34	1.3	74	7.1	9.1	0.032	0.0025	18.9	0.116	0.12	0.016	0.24	0.005	7.5	15.3	2.90392	165	-7.80667	-51.4	1.4	1.6	2	3	4.2	5	6	7.2	8.6	11.6742	3.93125	1.92813	2.37319	7.26812	8.10578	15.3571	20.6383	25.6792	1.90907	2.05085	2.02079	1.912	4.39811	4.75057
5029 at Irongate	74	1926336	5604744	48.5	31	7.1	16.28	1.8	113	16.1	14.4	0.01	0.152	23	0.0545352	0.126765	0.008	2.2	0.005	7.2	14.9	0.515658	281	-7.45	-48	3.4	3.8	4.8	6.6	16	22	30.2	41.2	51.8	12.1572	11.706	8.46418	8.15453	14.9084	19.0155	25.7095	40.1817	52.3894	5.57814	6.2557	6.73528	4.73309	13.2033	18.7566
1940	75	1936871	5601730	76.2	57	11.4	44	3.3	210	47	52	1.205	0.37	36.2	0.0808316	0.177403	0.026	0.001	0.419	6.9	15	0.51332	564	-6.51	-42	21	22.8	26.8	32.6	41.8	53	66.4	79.8	88.6	20.6912	20.734	25.2776	31.1098	41.8235	49.1072	64.1748	78.7739	84.1041	21.3017	23.08	26.4124	31.9846	43.2401	51.3726
WELL#3697	76	1928379	5603871	89.5	37	7.9	19.69	2.2	130	18.9	17.7	0.01	0.049	21	0.0319116	0.126765	0.017	1.3	0.005	7.7	14	0.527461	339	-7.67	-50.3	12.6	13.6	15.6	18.8	24	30.8	40.2	52	63.2	12.1572	13.4652	14.3116	19.71	27.3091	32.8892	41.7293	49.9758	57.858	7.29476	9.28387	13.5683	18.0544	25.676	30.7791
[truncated: 21 more columns]

## Sheet: Table_S3
Sample information					Hydrochemistry																					SR chained - Predicted median age @ percentile (years)									GBR chained - Predicted median age @ percentile (years)
Site_ID	MapID	date	NZTM_E	NZTM_N	Ca	Mg	Na	K	HCO3	Cl	SO4	Fe	Mn	SiO2	B	F	DRP	NO3N	NH3N	PHLAB	DO	ECLab	d18O	dD	Temp	5	10	20	33	50	66	80	90	95	5	10	20	33	50	66	80	90	95
222	29	2010-12-08	1.93683e+06	5.61556e+06	23	1.9	9.9	1.3	82	6	7.6	0	0	21	0.08	0.13	0.1	0.2	0.1	7.9	0.3	178	-7.6	-48	14	7.4	8.9	18.4	27.6	36.5	40.4	49.4	58.3	64.9	26.291	30.832	32.724	35.422	44.588	55.117	64.311	78.656	87.803
222	29	2011-03-08	1.93683e+06	5.61556e+06	23	2	9.3	1.4	88	5.7	8.5	0	0	17.7	0.08	0.13	0.1	0.2	0.1	7.9	0.3	176	-7.6	-48	13.8	7.4	9.6	18	30.1	37	41.3	50.7	60.8	68.2	32.934	31.932	30.986	35.551	44.581	55.103	63.488	71.114	76.974
222	29	2011-06-08	1.93683e+06	5.61556e+06	23	2	9.3	1.3	86	5.8	0.5	0	0	19.1	0.08	0.13	0.1	0	0.1	8.1	3.3	178	-7.6	-48	13.7	6.2	9.1	16.3	28.3	40.4	47.3	54.5	65.6	72.3	31.863	30.844	31.478	35.656	45.768	55.194	64.249	78.578	87.727
222	29	2011-09-29	1.93683e+06	5.61556e+06	24	2	9.8	1.4	88	6.1	7	0.2	0	18.3	0.08	0.13	0.1	0	0	8.2	0.3	174	-7.6	-48	14	11.3	16.6	19.4	28.1	36.4	39.5	48.5	59.3	65.1	5.899	11.416	18.282	25.878	29.075	32.188	37.138	45.709	51.55
222	29	2011-12-05	1.93683e+06	5.61556e+06	24	1.8	9.7	1.3	88	5.7	7.2	0.3	0	16.7	0.08	0.13	0.1	0	0	8.4	0.3	172	-7.6	-48	14.6	7.3	8.9	14.8	21.6	28.8	32.6	38.1	47.7	54	5.358	6.324	15.49	26.443	29.075	32.369	38.38	48.452	57.718
222	29	2012-03-08	1.93683e+06	5.61556e+06	26	2.1	10.4	1.5	88	6.3	8.4	0	0	19.6	0.08	0.13	0.1	0	0.1	8.1	0.3	172	-7.6	-48	14.2	11.5	18	19.5	28.2	35.5	41.1	51.3	61.3	69.4	27.891	31.944	30.953	35.632	45.107	55.092	63.587	71.103	77.113
222	29	2012-06-20	1.93683e+06	5.61556e+06	25	1.9	10.1	1.4	88	5.9	8.2	0	0	18.2	0.08	0.13	0.1	0	0.1	8.1	0.1	177	-7.6	-48	14.1	37.2	38.2	29.3	34.4	37.9	41.7	48.1	55.1	60.9	34.472	31.937	30.955	35.597	44.928	55.101	63.587	71.51	77.029
222	29	2012-09-26	1.93683e+06	5.61556e+06	23	1.9	10	1.3	88	5.9	8.8	0	0	18.7	0.08	0.13	0.1	0	0.1	8	0.1	175	-7.6	-48	14.3	28	29.5	25.6	30.1	35.3	38.6	46.3	53.6	60.3	34.483	31.943	30.955	35.56	44.874	55.104	63.587	70.944	77.058
222	29	2012-12-10	1.93683e+06	5.61556e+06	24	1.9	9.9	1.4	88	6.7	8.3	0.1	0	19.2	0.08	0.13	0.1	0	0.1	8.1	0.2	178	-7.6	-48	14.4	12.4	18.2	19.7	27.1	32.9	36.3	43.7	54	59.2	28.195	31.947	30.999	35.625	44.879	54.846	63.691	70.82	77.065
222	29	2013-08-21	1.93683e+06	5.61556e+06	23	1.8	9.6	1.3	88	5.9	9	0	0	19.2	0.08	0.13	0.1	0	0.1	8	0.3	179	-7.6	-48	13.8	6.8	8.6	17.1	29.5	38.1	43	51.5	61.8	69.2	32.349	31.936	30.989	35.586	45.004	55.104	63.4	70.951	76.952
222	29	2013-12-11	1.93683e+06	5.61556e+06	24	1.9	11	1.6	89	5.5	8.3	0	0	19.8	0.08	0.13	0.1	0	0	7.9	0.2	177	-7.6	-48	13.8	11.6	17.7	21.6	30.2	38.2	43	50.3	60.5	67	6.204	11.769	17.011	25.999	29.613	36.567	46.825	56.409	65.583
222	29	2014-03-10	1.93683e+06	5.61556e+06	24	1.9	10.2	1.5	89	6	8.3	0	0	19.9	0.08	0.13	0.1	0	0.1	8.1	0.2	176	-7.6	-48	14.2	12.9	18.2	21.1	28.4	35.7	39.2	47.1	57.3	63.4	27.105	31.942	30.916	35.66	44.928	55.092	63.587	70.996	77.101
222	29	2014-06-25	1.93683e+06	5.61556e+06	22	1.8	9.6	1.3	88	6.6	8.3	0	0	19.3	0.08	0.13	0.1	0.1	0.1	8	0.1	176	-7.6	-48	13.8	32.8	31.8	31.8	42.1	44.7	50	57.3	61.4	67.6	44.28	45.092	40.623	46.742	48.045	55.454	61.366	69.633	76.598
222	29	2014-09-11	1.93683e+06	5.61556e+06	22	1.9	10.5	1.3	88	5.3	8.2	0	0	19.4	0.08	0.13	0.1	0	0	8.1	0.1	177	-7.6	-48	14.1	30.4	30.5	26.9	33	38.2	41.7	49.7	56.5	63.7	9.543	14.126	16.046	25.71	29.484	36.504	46.712	56.112	65.528
222	29	2014-12-05	1.93683e+06	5.61556e+06	25	2.1	10.8	1.5	88	5.3	8.7	0	0	20	0.08	0.13	0.1	0	0.1	8.1	0.2	177	-7.6	-48	14	12.4	18	21.2	29	37.1	42	49.2	59.5	65.7	26.961	31.944	30.916	35.661	45.236	55.092	63.587	71.123	77.089
222	29	2015-03-04	1.93683e+06	5.61556e+06	23	1.9	9.6	1.4	89	5.3	8.1	0	0	19.6	0.08	0.13	0.1	0.1	0.1	8.1	0.2	177	-7.6	-48	14	12.2	17.7	20.8	30	37.5	40.1	48.6	57.9	64.3	27.12	31.944	31.016	35.628	44.536	55.117	63.488	70.615	77.335
222	29	2015-06-17	1.93683e+06	5.61556e+06	22	1.9	10.1	1.4	88	5.5	9.4	0	0	19.4	0.08	0.13	0.1	0	0	7.9	0.2	178	-7.6	-48	13.9	9.3	9.9	19.7	29.5	35.9	40.5	48.6	57.2	64.7	7.002	11.651	16.046	25.967	29.529	36.505	46.792	56.302	65.528
222	29	2015-09-09	1.93683e+06	5.61556e+06	25	2.2	10.9	1.5	87	5.7	8.4	0	0	20	0.08	0.13	0.1	0	0.1	8.1	0.3	177	-7.6	-48	13.7	11.3	18.1	18.8	29.6	38.8	43.7	54	63.7	70.1	31.932	31.936	30.916	35.638	45.012	55.092	63.587	71.126	77.019
222	29	2015-12-01	1.93683e+06	5.61556e+06	23	2	9.2	1.4	88	5.7	7.8	0	0	19.4	0.08	0.13	0.1	0	0.1	8	0.1	180	-7.6	-48	13.9	29.3	28.3	27.5	35.7	39.6	44	52.3	59.3	66	37.377	31.936	36.223	35.554	45.367	55.072	62.605	70.58	77.18
222	29	2016-03-09	1.93683e+06	5.61556e+06	24	2	10.2	1.5	89	5.8	8.1	0	0	21	0.08	0.13	0.1	0.4	0.1	8.1	0.1	180	-7.6	-48	14.1	23.9	23.4	26.4	33.5	38.7	42.2	50.3	57.1	63.9	37.357	31.945	37.882	46.834	48.075	55.776	63.364	69.682	77.41
222	29	2016-06-07	1.93683e+06	5.61556e+06	24	1.9	9.9	1.4	89	5.4	8	0	0	20	0.08	0.13	0.1	0	0.1	8	0.3	179	-7.6	-48	13.8	9	9.9	18.6	30.2	39.2	43.2	51.5	61.4	67.9	32.993	31.934	30.952	35.61	45.057	55.109	63.587	70.952	77.107
222	29	2016-09-27	1.93683e+06	5.61556e+06	23	1.9	9.7	1.4	88	5.6	8.1	0	0	19.8	0.08	0.13	0.1	0.3	0.1	8	0.1	180	-7.6	-48	13.9	24.7	23.5	27.4	39.2	41.1	44.2	51.9	59.2	65.7	37.421	31.938	36.199	35.584	44.587	55.081	62.704	70.254	77.268
222	29	2016-12-06	1.93683e+06	5.61556e+06	23	2	10	1.4	88	5.7	8.3	0	0	19.6	0.08	0.13	0.1	0	0.1	8	0.1	179	-7.6	-48	14	35.9	36.3	30.4	35.1	40.3	44.3	51.8	59.8	66.4	37.38	31.943	36.223	35.559	45.367	55.073	62.704	70.587	77.014
222	29	2017-03-07	1.93683e+06	5.61556e+06	23	1.8	9.4	1.4	88	5.5	7.9	0	0	20	0.08	0.13	0.1	0	0.1	7.9	0.1	179	-7.6	-48	14.1	38.7	39.3	31.3	39.1	40.5	44.8	50	55.7	63.1	37.254	31.943	36.193	35.585	44.97	55.067	62.517	70.672	77.199
222	29	2017-06-28	1.93683e+06	5.61556e+06	23	2	10.4	1.4	89	5.6	8.4	0	0	19.8	0.08	0.13	0.1	0.1	0.1	8.1	0.1	178	-7.6	-48	13.9	33.4	32.9	29.6	40.1	41.9	45.1	51.3	57.2	63.9	37.382	31.936	36.199	35.632	44.766	55.081	62.704	70.283	77.102
222	29	2017-09-05	1.93683e+06	5.61556e+06	24	1.8	9.9	1.5	88	6.1	8.3	0	0	21	0.08	0.13	0.1	0.3	0	8.1	0.1	179	-7.6	-48	14	31	30.5	27.7	39.7	40	42.7	49.7	56.3	63.6	12.986	20.022	28.771	33.594	45.504	55.095	64.361	78.783	87.774
222	29	2017-12-05	1.93683e+06	5.61556e+06	24	2	10.3	1.4	87	5.8	8.1	0	0	21	0.08	0.13	0.1	0.4	0.1	8	0.1	182	-7.6	-48	14.1	28.2	28.4	29	34.5	40.6	44.9	51.4	58	65.4	24.101	30.835	32.724	35.415	44.647	55.109	64.311	78.917	87.938
222	29	2018-03-06	1.93683e+06	5.61556e+06	23	1.9	9.9	1.4	89	6.1	7.9	0	0	21	0.08	0.13	0.1	0	0.1	7.9	0.2	180	-7.6	-48	14	12.8	17.9	21.5	28.7	35.8	40.7	48.8	58.6	65.5	27.335	31.942	34.488	35.414	45.056	55.081	64.14	78.567	87.843
222	29	2018-06-13	1.93683e+06	5.61556e+06	24	1.9	10.3	1.4	88	6.2	7.8	0	0	21	0.08	0.13	0.1	0	0.1	8	0.2	177	-7.6	-48	13.9	12.5	17.3	21.6	29.2	36.8	41.3	48.9	59	65.6	27.087	31.934	34.483	35.417	45.244	55.081	64.14	78.721	87.89
222	29	2018-09-04	1.93683e+06	5.61556e+06	24	2	9.9	1.4	87	6	8.4	0	0	19.9	0.08	0.13	0.1	0	0.1	8	0.2	178	-7.6	-48	13.7	12.3	17.4	21.2	31.3	38.6	42.7	51.6	60.3	67.3	32.086	31.935	30.952	35.61	45.057	55.109	63.587	70.946	76.949
222	29	2018-12-04	1.93683e+06	5.61556e+06	24	2.1	10.4	1.5	88	6	7.6	0	0	22	0.08	0.13	0.1	0	0.1	8.2	2.2	180	-7.6	-48	14	6.8	10.7	16.1	28.7	39.5	44.6	55.7	66.4	73.8	27.076	30.862	34.831	35.493	45.899	55.138	64.901	78.727	87.926
222	29	2019-03-05	1.93683e+06	5.61556e+06	23	1.9	10.2	1.4	88	6.1	7.8	0	0	21	0.08	0.13	0.1	0	0.1	8	0.2	180	-7.6	-48	13.9	14.3	17.8	22.4	28.7	37.5	39.2	46.3	56.1	60.2	27.335	31.935	34.488	35.414	45.011	55.081	64.14	78.721	87.89
222	29	2019-06-04	1.93683e+06	5.61556e+06	26	2.1	10.4	1.4	90	6.2	8.3	0	0	19.4	0.08	0.13	0.1	0.6	0	8	0.2	181	-7.6	-48	13.9	14	18	22.4	30.9	36.2	39.9	47.3	57.1	61.9	8.237	11.669	16.552	20.67	22.763	29.544	34.927	43.214	49.364
222	29	2019-09-17	1.93683e+06	5.61556e+06	24	1.9	9.6	1.4	86	6	7.5	0	0	20	0.08	0.13	0.1	0.1	0.1	8.1	0.2	173	-7.6	-48	13.9	12	17.2	22.2	30.9	37.7	38.7	47.6	58.1	61.6	26.071	30.824	29.214	35.655	44.589	55.117	63.488	70.625	77.332
222	29	2019-12-18	1.93683e+06	5.61556e+06	25	2.2	10.3	1.5	88	5.9	7.8	0	0	31	0.08	0.13	0.1	0.1	0	8	-0.3	175	-7.6	-48	13.9	7.7	9.6	16.4	25.4	33.5	36.3	41.6	51.4	55.9	13.225	20.017	28.812	33.499	45.65	54.921	64.449	78.938	87.86
222	29	2020-03-18	1.93683e+06	5.61556e+06	24	2	10.1	1.4	88	5.8	8.2	0	0	22	0.08	0.13	0.1	0	0.1	8	-0.2	174	-7.6	-48	13.8	10.9	15.2	19.4	27	37.1	39.2	43	53.8	56.6	43.214	45.055	40.595	46.719	48.173	55.653	62.278	69.995	76.848
222	29	2020-06-22	1.93683e+06	5.61556e+06	25	2.1	10.2	1.5	88	5.9	8	0	0	21	0.08	0.13	0.1	0.6	0	7.9	-0.2	177	-7.6	-48	13.7	10.1	11	19.3	30	37	40.3	42.5	53	56.9	14.21	20.017	28.812	33.525	45.523	55.101	64.602	78.976	87.801
413	20	2010-12-08	1.93699e+06	5.62024e+06	28	2.6	13.9	2	113	6.5	2.9	0	0	33	0.08	0.13	0.5	0	0.2	8	0.2	218	-7.6	-48	15.5	40.8	43.2	49.7	46.9	62.8	72.2	81.9	90.7	96.1	20.327	24.046	29.292	38.411	44.921	54.454	64.461	78.639	88.025
413	20	2011-06-08	1.93699e+06	5.62024e+06	27	2.7	12.7	1.8	118	6.2	1	0	0	31	0.08	0.13	0.5	0	0.2	8.1	4.5	215	-7.6	-48	14.8	8.1	8.1	31.1	38.3	60.7	65.5	81.4	94.8	96.9	18.192	19.939	29.703	39.148	45.198	55.025	65.072	78.64	88.001
413	20	2011-09-29	1.93699e+06	5.62024e+06	28	2.8	14	2.1	120	6.4	2.9	0	0.1	31	0.08	0.13	0.5	0	0.2	8	0.3	215	-7.6	-48	15	37.6	39.5	45.3	51.6	61	73.1	83	92.2	97.9	18.779	20.642	28.234	35.955	44.215	54.438	64.532	79.361	88.006
413	20	2011-12-05	1.93699e+06	5.62024e+06	29	2.6	13.6	2	120	6.2	4	0	0	32	0.08	0.13	0.5	0	0.2	8.1	0.3	215	-7.6	-48	15.7	39.3	42.6	42.2	45.8	60.2	71	81.9	93	98.7	16.586	19.803	29.294	39.206	45.672	54.752	64.528	78.642	88.019
413	20	2012-12-10	1.93699e+06	5.62024e+06	27	2.6	13.6	2	121	7.1	2.8	0	0	31	0.08	0.13	0.5	0	0.2	8	0.1	218	-7.6	-48	15.5	48.1	48.8	53	55.8	65	74	83.7	91.4	96.7	28.248	31.099	34.992	37.787	44.921	54.379	64.29	78.436	88.058
413	20	2013-08-21	1.93699e+06	5.62024e+06	27	2.6	14.3	2.1	121	6.3	2.8	0	0	31	0.08	0.13	0.5	0	0.2	8	0.4	222	-7.6	-48	15	33.5	36.3	44.8	51.6	61.3	72.6	81.6	92.8	98.3	20.441	23.15	29.111	38.404	44.585	54.913	65.039	78.641	88.024
413	20	2013-12-12	1.93699e+06	5.62024e+06	27	2.6	13	2	128	6.4	2.7	0	0	32	0.08	0.13	0.5	0	0.2	8	0.2	218	-7.6	-48	15.4	40.3	42.5	49.1	52.6	62.5	72.2	81.6	90.5	95.8	20.317	24.046	29.292	38.404	44.921	54.454	64.39	78.639	88.025
413	20	2014-03-12	1.93699e+06	5.62024e+06	27	2.7	17.5	2.4	121	6.5	2.8	0	0	31	0.08	0.13	0.5	0	0.2	8	0.3	216	-7.6	-48	15.4	40.3	41	47.1	49.5	63	74.9	83	90.6	96.4	20.292	24.046	29.292	38.41	44.921	54.454	64.461	78.643	88.025
413	20	2014-06-17	1.93699e+06	5.62024e+06	27	2.6	13.1	2	121	6.5	2.8	0	0	31	0.08	0.13	0.5	0	0.2	8.1	0	215	-7.6	-48	15.1	58.1	59.1	60.4	67.5	71.9	81	87.3	92.2	96.6	28.764	31.103	34.976	37.805	44.941	54.379	64.29	78.436	88.025
413	20	2014-09-09	1.93699e+06	5.62024e+06	28	2.7	14.7	2	122	5.9	2.2	0	0.1	32	0.08	0.13	0.5	0	0.2	8	0.2	221	-7.6	-48	15.2	40.7	44.1	49.3	47.9	60.6	73	82.1	91.7	97.1	18.802	20.642	28.234	36.418	44.603	54.705	64.532	79.36	88.022
413	20	2014-12-05	1.93699e+06	5.62024e+06	28	2.9	16.4	2.4	122	5.8	2.8	0	0.1	31	0.08	0.13	0.5	0	0.2	8	0.2	217	-7.6	-48	15.4	47.6	48.7	50.1	46.6	61.5	74.3	83	91.4	97.4	18.654	20.642	28.234	35.993	44.477	54.705	64.532	79.36	88.022
413	20	2015-03-04	1.93699e+06	5.62024e+06	27	2.6	14.3	2.1	123	5.7	2.2	0	0	31	0.08	0.13	0.5	0	0.2	8	0.1	216	-7.6	-48	15.4	48.8	50	52.7	54.5	63.7	74	82	90	95.5	28.11	31.103	34.976	37.771	44.921	54.646	64.29	78.436	88.025
413	20	2015-06-19	1.93699e+06	5.62024e+06	28	2.6	14.2	2.1	122	6	2.3	0	0	32	0.08	0.13	0.5	0	0.2	8	0.3	217	-7.6	-48	15.1	40.4	41.5	48.5	50.4	60.6	74	83.1	91.7	97.3	20.442	24.046	29.292	38.399	44.921	54.721	64.461	78.644	88.025
413	20	2015-09-09	1.93699e+06	5.62024e+06	29	2.9	14.6	2.2	121	6.1	2.6	0	0	32	0.08	0.13	0.5	0	0.2	8	0.3	218	-7.6	-48	15.1	37.7	39.9	44.6	49.8	59.1	73.7	83.3	92	98.9	20.416	24.046	29.292	37.974	44.795	54.721	64.461	78.644	88.025
413	20	2015-12-01	1.93699e+06	5.62024e+06	28	2.8	12.9	2.1	121	5.9	2	0	0.1	30	0.08	0.13	0.5	0.1	0.2	7.9	0.2	219	-7.6	-48	15.4	42.2	45.6	49	48.8	61.2	71.4	79.7	89.8	94.9	18.636	20.635	28.234	35.374	44.135	54.713	64.461	79.36	87.988
413	20	2016-03-09	1.93699e+06	5.62024e+06	29	2.9	14.7	2.2	124	6	2.2	0	0.1	34	0.08	0.13	0.5	0	0.2	8.1	0.2	220	-7.6	-48	15.5	43.2	45.7	47.9	49	60.4	72.4	80.9	90.3	95.6	18.642	20.642	28.234	36.027	44.477	54.705	64.532	79.36	88.022
413	20	2016-06-07	1.93699e+06	5.62024e+06	28	2.6	13.5	2.1	124	5.7	2.1	0	0	32	0.08	0.13	0.5	0.1	0.2	8	0.2	220	-7.6	-48	15.2	44	46.2	48.9	50.3	61.3	73.2	81.1	91.3	96.1	20.463	24.036	29.292	38.395	44.453	54.729	64.461	78.64	87.986
413	20	2016-09-26	1.93699e+06	5.62024e+06	27	2.7	14.5	2	122	5.9	2.4	0	0	31	0.08	0.13	0.5	0.1	0.2	8	0.1	220	-7.6	-48	15.2	48.7	51	51.9	53	63.5	74.4	82.2	91	95.8	28.224	31.105	34.976	37.769	44.453	54.655	64.29	78.436	87.986
413	20	2016-12-06	1.93699e+06	5.62024e+06	28	2.7	13.8	2	122	5.9	2.2	0	0	30	0.08	0.13	0.5	0	0.2	8	0.1	221	-7.6	-48	15.6	51.3	52.5	54.6	56.1	64.2	72.3	81.9	89.6	94.8	25.727	29.973	33.197	37.77	44.921	54.608	64.29	78.447	88.025
413	20	2017-03-07	1.93699e+06	5.62024e+06	27	2.6	13.4	2.1	122	6.4	1.9	0	0	31	0.08	0.13	0.5	0	0.2	7.9	0.2	217	-7.6	-48	16.3	42.7	45.4	48.9	49.4	56.7	68.8	78.5	88	94.6	16.419	19.787	29.294	39.166	45.672	54.417	64.528	78.636	88.025
413	20	2017-06-28	1.93699e+06	5.62024e+06	28	2.7	13.8	2.1	124	5.6	2.2	0	0.1	31	0.08	0.13	0.5	0	0.2	8	0.2	218	-7.6	-48	14.9	40.7	44.7	49.1	50.8	62	73.5	81.6	91	96.5	18.779	20.642	28.234	36.372	44.215	54.705	64.532	79.358	88.006
413	20	2017-09-05	1.93699e+06	5.62024e+06	28	2.7	13.1	2.1	123	6.5	2	0	0.1	32	0.08	0.13	0.5	0	0.2	8	0	219	-7.6	-48	15	37.1	41	50.5	51.8	63.8	67.3	76	84.9	87.5	27.354	31.103	33.927	37.795	44.181	54.363	64.361	78.53	88.01
413	20	2017-12-05	1.93699e+06	5.62024e+06	28	2.9	13.7	2.2	122	6	2	0	0.1	33	0.08	0.13	0.5	0	0.2	7.9	-0.1	219	-7.6	-48	15.8	37.5	41.4	47.9	34.2	54.9	56.5	69.3	79.3	79	24.801	30.202	32.149	37.597	44.443	54.658	64.532	78.732	88.031
413	20	2018-03-06	1.93699e+06	5.62024e+06	27	2.7	14.2	2	123	6.4	1.7	0	0.1	33	0.08	0.13	0.5	0	0.2	8	0	218	-7.6	-48	15.5	52.8	53.4	51.2	47.8	60.2	63.9	71.4	84.4	84.5	25.381	29.982	32.149	38.028	44.568	54.428	64.532	78.732	88.025
413	20	2018-06-13	1.93699e+06	5.62024e+06	28	2.7	14.4	2.1	125	6.6	2.3	0	0.1	33	0.08	0.13	0.5	0.3	0.2	8	0	219	-7.6	-48	15	63.6	63.1	63.1	59.9	70.4	79.8	87	92	97.9	27.389	31.125	33.943	37.793	43.713	54.372	64.361	78.711	87.97
413	20	2018-09-04	1.93699e+06	5.62024e+06	27	2.6	14.2	2.1	124	6.1	1.8	0	0.1	31	0.08	0.13	0.5	0.6	0.2	7.9	0.1	218	-7.6	-48	14.9	53.6	55	57.5	59	67.4	78.3	85.3	92.1	96.8	25.028	29.994	32.149	37.991	43.693	54.705	64.685	78.95	87.976
413	20	2018-12-04	1.93699e+06	5.62024e+06	27	2.7	14.9	2.2	123	6.1	1.3	0	0.1	32	0.08	0.13	0.5	0.1	0.2	8.1	0.1	222	-7.6	-48	15.8	52.4	53.5	54.6	52.9	62.6	70.5	80.7	88.9	93.9	22.483	29.992	32.149	38.239	44.081	54.665	64.532	78.732	87.986
413	20	2019-03-05	1.93699e+06	5.62024e+06	28	2.7	14.4	2.1	123	6.3	1.9	0	0.1	32	0.08	0.13	0.5	0.4	0.2	8.1	0.1	223	-7.6	-48	15.7	48.1	49.9	50.9	51.6	60.8	71.1	79.1	88	92.8	24.447	29.993	32.149	38.067	44.081	54.666	64.532	78.732	87.986
413	20	2019-06-05	1.93699e+06	5.62024e+06	29	2.6	13.3	2.1	126	6.3	1.5	0	0.1	31	0.08	0.13	0.5	0	0.2	8	0.2	220	-7.6	-48	15	42.8	45.6	48.7	52	61.3	72.7	81.1	90.1	95.4	16.945	20.184	28.234	36.374	44.306	54.705	64.599	79.357	88.003
413	20	2019-09-17	1.93699e+06	5.62024e+06	27	2.7	14	2.1	122	6.2	1.4	0	0	31	0.08	0.13	0.5	0	0.2	8	0.2	214	-7.6	-48	15.2	39.8	42.9	46.8	48.6	58.8	70.6	81.9	92.3	98.6	18.568	20.267	29.294	39.174	44.975	54.721	64.461	78.638	88.022
413	20	2019-12-18	1.93699e+06	5.62024e+06	30	3	14.8	2.2	123	6.4	1.9	0	0	33	0.08	0.13	0.4	0	0.2	8.1	0.3	211	-7.6	-48	15.2	40.3	42.2	45.4	50.5	57.8	73.3	82.2	91.6	98.4	20.427	24.031	28.892	35.134	43.449	54.456	64.461	79.445	88.025
413	20	2020-03-18	1.93699e+06	5.62024e+06	27	2.8	13.6	2	127	6	2	0	0	33	0.08	0.13	0.5	0.1	0.2	7.9	0.4	213	-7.6	-48	15.4	31.6	35	39.9	47.8	58.1	71.9	81	93.2	99.1	20.281	23.145	29.111	38.021	44.505	54.922	65.039	78.644	88.006
413	20	2020-06-22	1.93699e+06	5.62024e+06	29	2.9	14.3	2.2	125	6.1	1.8	0	0.1	33	0.08	0.13	0.5	0.2	0.2	7.6	0.3	218	-7.6	-48	15	34.4	35.9	42.5	47.8	59.1	73.1	82.3	92.2	98.7	16.967	20.681	28.234	35.341	43.712	54.714	64.599	79.543	87.969
611	77	2011-03-08	1.93142e+06	5.61529e+06	21	2.1	8.5	1.2	80	6	9.5	0	0	16.9	0.08	0.13	0	0.1	0	7.7	3.5	170	-7.6	-48	14.5	3.1	3.7	5.5	11.5	21.2	28.6	33.4	42.9	50.9	1.596	1.648	2.698	5.409	5.956	8.313	19.716	33.74	35.47
611	77	2011-09-29	1.93142e+06	5.61529e+06	22	2.3	9.3	1.2	80	6.2	9.6	0	0	18.4	0.08	0.13	0	0.1	0	7.8	1.1	168	-7.6	-48	14.8	4.3	5.5	6.1	11.2	21	28.3	40	49.2	58.9	0.853	0.993	2.003	2.437	6.078	8.029	19.872	33.449	35.299
611	77	2011-12-05	1.93142e+06	5.61529e+06	22	2	9	1.2	80	6	11.9	0	0	18.5	0.08	0.13	0	0.1	0	7.9	1.2	167	-7.6	-48	16.2	3.4	4.3	3.4	3.5	11.7	10.7	29.1	35.7	50.2	-0.11	0.231	1.133	1.487	4.603	7.962	19.374	23.629	33.458
611	77	2012-03-08	1.93142e+06	5.61529e+06	22	2.1	8.9	1.2	80	6.7	9.3	0	0	18.6	0.08	0.13	0	0.1	0	7.8	1.8	164	-7.6	-48	14.4	4.1	5	6.1	11.7	21.8	28.5	37.9	47	54.2	1.55	1.631	3.39	5.9	6.9	8.659	12.667	18.527	33.537
611	77	2012-06-25	1.93142e+06	5.61529e+06	23	2.3	9.1	1.3	80	6.2	9	0	0	17.6	0.08	0.13	0	0.1	0	7.9	0.1	166	-7.6	-48	14.6	6.7	7	8	20.8	22.1	24.9	33	40.5	48.1	1.917	2.306	3.512	4.43	7.082	8.921	20.424	33.918	34.916
611	77	2012-09-26	1.93142e+06	5.61529e+06	21	2.1	9.7	1.2	80	6.2	10.5	0	0	18	0.08	0.13	0	0.1	0	7.8	1.7	164	-7.6	-48	14.9	3.8	4.9	5.8	8.6	16.5	22.3	26.4	32.6	41.7	0.472	0.999	2.003	2.479	6.01	8.082	19.872	33.43	35.293
611	77	2013-08-19	1.93142e+06	5.61529e+06	21	2.2	10.2	1.4	80	6.4	9.4	0	0	18.5	0.08	0.13	0	0.1	0	7.7	1.6	169	-7.6	-48	14.4	4.8	6.1	6.5	12.7	22.1	29	36	43.8	52.7	1.475	1.627	3.419	6.048	6.312	9.004	20.424	33.499	35.673
611	77	2013-12-12	1.93142e+06	5.61529e+06	22	2.1	8.7	1.2	89	6.2	9.7	0	0	19.1	0.08	0.13	0	0.1	0	7.8	1.4	171	-7.6	-48	14.7	4	4.9	5.7	10.3	21.9	26.9	34.1	43.2	50.4	1.744	2.318	3.408	4.27	7.367	9.243	20.567	33.489	35.486
611	77	2014-03-12	1.93142e+06	5.61529e+06	22	2.3	10.1	1.3	80	6.4	10.1	0	0	18.8	0.08	0.13	0	0.1	0	7.9	1.5	169	-7.6	-48	14.9	4.3	5.7	5.9	10.2	21.3	25.7	30.8	37.7	46.4	0.35	0.218	0.96	1.066	4.998	7.976	19.802	33.291	35.202
611	77	2014-06-17	1.93142e+06	5.61529e+06	21	2	9.1	1.2	80	6.4	10	0	0	18.2	0.08	0.13	0	0.1	0	7.8	1.6	167	-7.6	-48	14.4	4.3	5.6	6.2	11.8	20.9	28.4	35.8	44.2	52.8	1.412	1.629	3.493	5.956	7.259	9.411	20.567	33.635	35.762
611	77	2014-09-09	1.93142e+06	5.61529e+06	22	2.2	9.8	1.2	80	5.8	9.2	0	0	19.3	0.08	0.13	0	0.1	0	7.7	1.7	172	-7.6	-48	14.4	4	4.9	6	12.4	21.7	31.3	38.9	48.5	55.9	1.786	2.338	4.383	11.222	22.338	29.223	35.823	43.277	51.67
611	77	2014-12-05	1.93142e+06	5.61529e+06	21	2.1	10.1	1.3	80	5.7	9.8	0	0	19	0.08	0.13	0	0.1	0	7.9	1.6	168	-7.6	-48	14.6	4.3	5.5	5.9	12.1	21.8	29.3	34.5	43.3	51.2	1.289	1.747	2.903	4.476	7.038	8.916	20.424	33.477	35.337
611	77	2015-03-04	1.93142e+06	5.61529e+06	22	2.2	8.9	1.2	80	5.7	9.4	0	0	18.4	0.08	0.13	0	0.1	0	7.8	2	168	-7.6	-48	14.8	3.4	4.1	5.2	9.5	17.3	23.9	30.9	39.2	48	0.952	1.311	2.294	2.474	5.791	7.656	18.952	23.926	33.528
611	77	2015-06-17	1.93142e+06	5.61529e+06	22	2.2	10.7	1.3	80	6	10.4	0	0	18.3	0.08	0.13	0	0.1	0	7.4	1.6	171	-7.6	-48	14	3.9	5.2	6.5	15.9	24.3	33.1	39.1	46.7	55.9	1.304	1.726	3.63	9.113	11.028	9.388	20.272	33.62	35.673
611	77	2015-09-09	1.93142e+06	5.61529e+06	23	2.4	9.9	1.3	80	6	9.7	0	0	19.5	0.08	0.13	0	0.1	0	7.1	1.6	170	-7.6	-48	14.3	4.2	5.1	6.5	13.2	22.9	31.7	40	49.1	57.7	1.353	1.767	3.617	9.3	10.872	9.344	20.304	33.576	35.663
611	77	2015-12-01	1.93142e+06	5.61529e+06	21	2.1	8.8	1.2	79	6.1	9.1	0	0	18.5	0.08	0.13	0	0.1	0	7.8	5.9	171	-7.6	-48	14.5	3.1	3.8	5.5	11.2	19.8	28.4	34.3	43.8	53	1.795	2.267	3.309	5.839	6.836	8.615	20.042	33.43	35.838
611	77	2016-03-09	1.93142e+06	5.61529e+06	22	2.3	10	1.3	81	6.5	9.4	0	0	19.7	0.08	0.13	0	0.1	0	7.9	1.7	171	-7.6	-48	14.5	4.6	5.9	6.2	12.1	21.8	28.3	39.7	49.6	56.8	1.63	2.243	3.276	6.7	8.986	9.334	20.567	33.477	35.6
611	77	2016-06-08	1.93142e+06	5.61529e+06	21	2.2	9.6	1.4	81	6	9.3	0	0	19	0.08	0.13	0	0.1	0	7.9	1.8	173	-7.6	-48	14.5	4.6	5.9	6.2	13	22.1	28.8	37.1	46.4	54.4	1.524	1.749	2.903	6.352	9.138	8.958	20.219	33.477	35.75
611	77	2016-09-27	1.93142e+06	5.61529e+06	21	2.1	9.4	1.2	78	6.2	9.3	0.1	0	18	0.08	0.13	0	0.1	0	7.8	1.4	172	-7.6	-48	14.2	4.4	6.2	6.4	16.7	26.1	30.1	39.2	46.5	53.2	1.897	2.462	4.474	11.649	23.662	30.606	37.957	46.645	54.814
611	77	2016-12-07	1.93142e+06	5.61529e+06	21	2.1	9.4	1.2	76	6.4	10.2	0	0	17.9	0.08	0.13	0	0.1	0	7.7	1.4	171	-7.6	-48	14.8	4	5.1	6	10.4	20.9	24.2	27.7	34.8	44.7	0.707	0.885	1.665	2.288	4.792	8.052	19.445	23.964	33.534
611	77	2017-03-07	1.93142e+06	5.61529e+06	21	2	9.2	1.3	79	6.1	9.2	0	0	18.6	0.08	0.13	0	0.1	0	7.6	0.2	168	-7.6	-48	15.5	4.1	5.4	5	6.6	11.2	11.2	13.8	20.3	26.3	0.607	0.91	1.898	2.522	5.039	7.989	19.872	33.251	34.654
611	77	2017-09-05	1.93142e+06	5.61529e+06	22	2.1	9.4	1.3	79	6.5	9.5	0	0	20	0.08	0.13	0	0.2	0	7.8	1.6	171	-7.6	-48	14.1	4.2	5.3	6.2	14.4	24.1	31.6	40.8	50.6	58	3.305	3.609	5.122	30.155	42.406	55.627	66.19	78.422	87.729
611	77	2017-12-05	1.93142e+06	5.61529e+06	22	2.3	10.1	1.3	79	6.2	9.5	0	0	20	0.08	0.13	0	0.1	0	7.8	1.5	170	-7.6	-48	14.7	4.5	5.7	5.9	11.1	21.1	28.6	37.4	45.9	54.5	3.113	3.169	4.218	6.052	7.377	9.34	20.567	33.577	35.392
611	77	2018-06-14	1.93142e+06	5.61529e+06	22	2.2	9.8	1.3	79	6.5	9.2	0	0	19.5	0.08	0.13	0	0.2	0	7.8	1.6	169	-7.6	-48	14.3	4.6	5.9	6.3	12.4	22.6	29.4	38.9	48.9	55.6	1.45	1.706	3.537	9.359	12.852	28.763	37.402	46.671	55.241
611	77	2018-09-12	1.93142e+06	5.61529e+06	22	2	9.7	1.2	79	6.6	9.3	0	0	19.2	0.08	0.13	0	1.4	0	7.8	1.7	172	-7.6	-48	14.5	4.8	6.3	6.9	13.5	23.8	28.3	38.1	49.3	56.5	1.697	2.231	3.26	6.206	9.477	9.346	20.589	33.477	35.88
611	77	2018-09-19	1.93142e+06	5.61529e+06	21	2.1	9.5	1.3	78	6.6	9.2	0	0	17.8	0.08	0.13	0	0.1	0	7.5	1.9	172	-7.6	-48	14.4	3.8	4.8	6.1	13	21.3	28.6	35.2	44.6	53.3	1.621	2.175	4.211	8.101	11.799	8.946	19.924	33.736	35.695
611	77	2018-12-05	1.93142e+06	5.61529e+06	22	2.3	10	1.3	79	6.6	9.4	0	0	19.1	0.08	0.13	0	0.1	0	7.8	1.6	173	-7.6	-48	14.8	4.6	6.1	6	10.6	19.8	26.2	34.5	44.1	52.9	0.985	1.273	2.122	2.878	7.14	8.563	20.533	33.294	35.282
611	77	2019-03-06	1.93142e+06	5.61529e+06	23	2.1	10.1	1.3	79	6.4	9	0	0	19.9	0.08	0.13	0	0.1	0	7.9	1.7	172	-7.6	-48	14.6	4	4.9	6.1	12.1	21.5	27.4	35.8	46	54.1	1.519	1.645	2.715	4.091	7.11	9.241	20.567	33.477	35.426
611	77	2019-06-05	1.93142e+06	5.61529e+06	23	2.2	9.3	1.3	81	6.5	8.8	0	0	18.3	0.08	0.13	0	0.1	0	7.9	1.6	172	-7.6	-48	14.7	4.3	5.6	6.2	11.1	20.1	26.1	35.6	45.1	53.8	1.46	1.621	2.715	3.621	7.206	9.323	20.567	33.632	35.435
611	77	2019-09-18	1.93142e+06	5.61529e+06	21	2.2	9.5	1.3	79	6.7	9	0	0	19.5	0.08	0.13	0	0.2	0	7.8	1.8	168	-7.6	-48	14.6	4.2	5.2	6.1	11.7	21.1	25.8	35.2	45.5	52.8	1.322	1.658	2.597	3.227	6.728	7.911	12.476	17.82	32.952
611	77	2019-12-18	1.93142e+06	5.61529e+06	23	2.3	9.8	1.3	79	6.6	9.5	0	0	19.8	0.08	0.13	0	0.2	0	7.9	1.8	165	-7.6	-48	14.6	4.1	5.4	6.1	12.8	22	25.9	33.7	43.6	50.8	1.276	1.664	2.715	4.06	6.768	8.539	20.042	33.458	35.457
611	77	2020-03-19	1.93142e+06	5.61529e+06	21	2.2	9.3	1.3	81	6.3	9.6	0	0	21	0.08	0.13	0	0.5	0	7.8	1.9	168	-7.6	-48	14.9	3.8	4.8	6.1	10.1	19	24.9	33.6	45.1	53.4	2.153	2.807	4.166	4.798	6.757	8.521	20.064	33.591	35.504
611	77	2020-06-23	1.93142e+06	5.61529e+06	22	2.3	9.5	1.3	82	6.6	9.4	0	0	19.3	0.08	0.13	0	0.1	0	7.1	1.9	174	-7.6	-48	14.6	4	4.9	6.1	10.7	19.3	26.2	35.5	45.3	53.6	1.323	1.614	2.607	3.529	5.817	8.236	19.438	24.045	33.504
1191	25	2011-06-08	1.91958e+06	5.6069e+06	45	9.3	19.5	2.1	144	23	17.6	0	0	24	0.08	0.13	0	8.7	0	7.2	6.1	403	-7.6	-48	15.1	6.1	8.8	14.8	13.4	15.8	20.6	31.4	41.8	50.5	5.208	7.088	14.669	19.235	22.729	30.851	39.112	49.429	60.084
1191	25	2011-09-28	1.91958e+06	5.6069e+06	44	8.8	22	2.4	141	22	16.2	0	0	24	0.08	0.13	0	7.3	0	7.1	5.2	378	-7.6	-48	15.8	5.2	8.6	15.2	10.6	11.9	14.1	23.2	33.6	42.8	5.089	6.997	14.669	19.231	22.818	30.838	39.112	49.403	60.062
1191	25	2011-12-07	1.91958e+06	5.6069e+06	44	8.6	21	2.4	142	23	21	0	0	24	0.08	0.13	0	6.9	0	7.1	5.3	380	-7.6	-48	15.5	5.8	10	15.4	12.1	13.5	18.6	27.7	36.3	45.6	2.071	2.103	4.137	4.761	9.343	9.295	11.98	14.988	18.905
1191	25	2012-03-07	1.91958e+06	5.6069e+06	41	8.5	19.4	2.2	145	23	17.7	0	0	22	0.08	0.13	0	6.8	0	7.2	5.6	369	-7.6	-48	15.4	6	10.2	15.9	13.1	16.1	20.6	30.6	40.1	48.1	5.369	7.087	14.669	18.886	22.772	30.848	39.198	49.415	60.139
1191	25	2012-06-21	1.91958e+06	5.6069e+06	45	9.1	21	2.5	146	21	21	0	0	24	0.08	0.13	0	5.9	0	7.2	4.3	365	-7.6	-48	15.9	6.2	8.5	14.4	9.4	11.9	16.6	26.4	37.3	47.1	2.065	2.086	4.137	4.747	9.972	9.289	12.048	15.915	20.015
1191	25	2012-09-26	1.91958e+06	5.6069e+06	43	8.5	21	2.3	148	23	19.9	0	0	24	0.08	0.13	0	6.8	0	7.1	5.1	366	-7.6	-48	16.8	5.3	9.7	14.4	6.7	4.7	5.7	10.3	14.6	23.6	2.146	2.621	4.137	4.762	9.13	9.248	12.048	14.987	18.905
1191	25	2012-12-12	1.91958e+06	5.6069e+06	47	9.5	21	2.5	158	26	18.2	0	0	24	0.08	0.13	0	8.7	0	7.1	5.8	424	-7.6	-48	15.5	6.3	9	14.8	12.9	15.7	19.6	29.5	41	48.9	2.113	2.638	4.137	4.762	9.343	9.368	11.98	15.02	20.015
1191	25	2013-08-15	1.91958e+06	5.6069e+06	43	9.7	23	2.4	154	22	17.4	0	0	25	0.08	0.13	0	6.1	0	7.2	4.6	395	-7.6	-48	15.3	6.4	9.5	17.2	17.8	21.1	26	34.5	44	52.9	5.004	6.684	14.669	19.234	22.772	30.831	40.318	53.691	64.672
1191	25	2013-12-10	1.91958e+06	5.6069e+06	48	8.8	23	2.6	158	22	17.1	0	0	25	0.08	0.13	0	8.9	0	7.1	5.8	407	-7.6	-48	15	6.1	8.9	15.3	14.7	18.3	23.2	33.4	41.9	50.2	5.247	7.088	14.669	19.233	22.772	30.839	39.112	49.427	60.062
1191	25	2014-03-13	1.91958e+06	5.6069e+06	48	9.9	23	2.5	154	23	17.1	0	0	25	0.08	0.13	0	8.4	0	7.3	6.3	401	-7.6	-48	16.3	5.2	8	14	10.8	13.4	13.1	20.6	32	40.6	5.063	7.078	12.903	17.995	22.729	30.806	39.112	49.409	60.35
1191	25	2014-06-23	1.91958e+06	5.6069e+06	45	8.4	21	2.6	155	22	17.5	0	0	25	0.08	0.13	0	8.1	0	7.4	6.1	404	-7.6	-48	15.8	5.7	9.7	15	10.8	13.5	14.7	23.1	30.6	37.5	5.681	10.792	16.138	19.466	22.729	30.826	38.966	49.407	60.084
1191	25	2014-09-12	1.91958e+06	5.6069e+06	42	8	21	2.4	146	21	17	0	0	25	0.08	0.13	0	5.9	0	6.9	5.6	374	-7.6	-48	16.7	5.3	9.7	14.3	5.7	4.5	6.1	10.5	14.4	22.7	4.997	7.075	14.627	19.227	22.818	30.837	39.112	49.326	60.062
1191	25	2014-12-04	1.91958e+06	5.6069e+06	44	8.9	24	2.5	154	23	17.4	0	0	26	0.08	0.13	0	6.3	0	7.2	5.2	399	-7.6	-48	15.4	6	10.8	15.4	13.4	17	19.8	31.6	41.5	49.9	5.089	7.088	14.669	19.234	22.772	30.832	39.112	49.415	60.084
1191	25	2015-03-05	1.91958e+06	5.6069e+06	46	8.9	23	2.5	156	23	16.8	0	0	24	0.08	0.13	0	6.2	0	7.3	4.9	393	-7.6	-48	19.1	5.4	10.2	14	2.1	1.4	0.1	3.9	5.3	15.9	5.078	7.079	12.862	17.995	22.818	30.822	39.112	49.317	60.35
1191	25	2015-09-10	1.91958e+06	5.6069e+06	42	8.8	23	2.4	148	20	17	0	0	25	0.08	0.13	0	3.8	0	7	4.7	358	-7.6	-48	15.7	5.6	10	15.4	10.6	14	14.4	21.1	31.5	38	4.965	6.67	14.669	19.231	22.787	30.83	40.318	53.691	64.65
1191	25	2015-12-02	1.91958e+06	5.6069e+06	42	9	22	2.4	152	22	16.7	0	0	25	0.08	0.13	0	4.5	0	7	4.8	373	-7.6	-48	15.5	5.7	10.1	15.4	13.1	14.3	20.1	30.7	43	52.2	5.089	7.007	14.669	19.232	22.787	30.831	40.318	53.691	64.65
1191	25	2016-03-10	1.91958e+06	5.6069e+06	44	8.7	22	2.6	156	25	17.2	0	0	27	0.08	0.13	0	4.8	0	7.2	4.4	392	-7.6	-48	15.3	6.4	8.6	15.3	13.3	15.8	21.9	32.4	42.3	51.5	5.182	6.684	14.669	19.217	22.772	30.83	40.318	53.614	64.356
1191	25	2016-06-09	1.91958e+06	5.6069e+06	42	8.7	22	2.4	156	22	16.6	0	0	25	0.08	0.13	0	3.7	0	7.2	4.4	378	-7.6	-48	16.4	5.3	9.1	14.1	7.8	7.9	9.7	16.1	23.5	32.8	4.914	6.593	14.627	19.212	22.818	30.824	40.318	53.518	64.356
1191	25	2016-09-28	1.91958e+06	5.6069e+06	38	8.1	22	2.2	151	21	16.5	0	0	25	0.08	0.13	0	2.9	0	7.1	4.5	351	-7.6	-48	15.5	5.1	8.2	13.3	12.4	14.2	18.8	25.2	32.7	40.9	5.025	6.602	14.669	19.217	22.787	30.839	40.239	53.634	64.334
1191	25	2016-12-08	1.91958e+06	5.6069e+06	39	8	19	2.2	155	22	16	0	0	24	0.08	0.13	0	3.2	0	7.2	4.6	363	-7.6	-48	15.3	5.7	9.5	15.9	15.4	16.5	21.8	33.8	43.9	52.9	5.025	6.603	14.669	19.232	22.772	30.839	40.239	53.691	64.672
1191	25	2017-03-08	1.91958e+06	5.6069e+06	40	8	20	2.3	152	23	15.4	0	0	25	0.08	0.13	0	3.6	0	7	4.2	367	-7.6	-48	15.8	5.5	9.5	15.2	8.9	12	15.7	23.9	36.4	44.7	5.025	6.591	14.669	19.216	22.858	30.824	40.239	53.605	64.334
1191	25	2017-06-29	1.91958e+06	5.6069e+06	47	9.3	23	2.7	165	25	15.5	0	0	25	0.08	0.13	0	5.7	0	7.1	4.3	407	-7.6	-48	15.2	6.8	9.3	16.3	16.9	19	25.1	33.3	41.8	50.6	5.165	6.604	14.669	19.216	22.812	30.829	40.318	53.614	64.334
1191	25	2017-09-06	1.91958e+06	5.6069e+06	47	9.5	22	2.6	160	25	16	0	0	28	0.08	0.13	0	7.7	0	7	5.2	415	-7.6	-48	15.3	6	10.6	15.9	14.5	15.3	21.5	31.5	42.8	52.5	5.316	7.007	14.669	19.232	22.772	30.831	39.112	49.414	60.062
1191	25	2017-12-06	1.91958e+06	5.6069e+06	49	10.5	23	2.7	155	24	15.1	0	0	27	0.08	0.13	0	9.8	0	7.1	5.5	429	-7.6	-48	15.6	6.2	8.1	16	12.6	14.7	20.4	31.4	43.9	53.1	5.316	7.002	14.669	19.231	22.787	30.829	39.112	49.414	60.062
1191	25	2018-03-07	1.91958e+06	5.6069e+06	46	9	24	2.6	155	22	18.6	0	0	28	0.08	0.13	0	9.5	0	7	7	418	-7.6	-48	15.4	5.3	9.3	15	13.3	15.1	19.8	30	38.2	48.2	2.298	2.637	4.137	4.764	9.284	9.275	11.98	14.984	19.022
1191	25	2018-06-14	1.91958e+06	5.6069e+06	45	9	23	2.5	149	23	18.4	0	0	26	0.08	0.13	0	7.6	0	7.1	5.4	404	-7.6	-48	15.3	5.7	10	15.2	14.2	14.5	19.1	29.8	39	49	2.071	2.104	4.137	4.762	9.328	9.284	11.98	14.975	18.905
1191	25	2018-09-05	1.91958e+06	5.6069e+06	42	9.3	23	2.5	151	24	18.6	0	0	25	0.08	0.13	0	7	0	7.2	5.2	397	-7.6	-48	15.2	6.1	10.4	15.8	14.9	15.8	20.8	32.5	42.2	51.4	2.19	2.637	4.137	4.763	9.591	9.335	11.98	15.02	20.015
1191	25	2018-12-05	1.91958e+06	5.6069e+06	47	9.3	23	2.6	154	25	18.2	0	0	26	0.08	0.13	0	6.9	0	7.2	4.9	421	-7.6	-48	15.7	6	7.9	14.9	12.2	13.5	17.4	27.2	40.6	50.8	2.28	2.623	4.137	4.761	9.606	9.368	12.048	15.019	20.015
1191	25	2019-03-06	1.91958e+06	5.6069e+06	48	9.5	23	2.5	159	24	18.4	0	0	27	0.08	0.13	0	8.1	0	7.2	5.4	427	-7.6	-48	15.5	5.9	7.8	15.1	12.2	14.9	19.1	29.8	41.7	51	2.298	2.636	4.137	4.761	9.606	9.368	11.98	15.019	20.015
1191	25	2019-06-05	1.91958e+06	5.6069e+06	48	9.1	21	2.4	159	22	18.5	0	0	25	0.08	0.13	0	7.3	0	7.1	5.3	411	-7.6	-48	15	5.5	9.7	15.9	15.4	18.2	23.6	33.7	43.6	52.2	2.229	2.638	4.137	4.763	9.328	9.376	11.98	15.034	20.021
1191	25	2019-09-18	1.91958e+06	5.6069e+06	45	9.1	23	2.5	153	23	19.1	0	0	24	0.08	0.13	0	6.7	0	7.1	5.1	399	-7.6	-48	15.3	6	9.9	16	14.7	14.9	20.8	30.8	40.5	49.1	2.071	2.104	4.137	4.763	9.328	9.369	11.98	14.989	18.905
1191	25	2020-03-19	1.91958e+06	5.6069e+06	47	9.5	23	2.6	160	24	19.6	0	0	28	0.08	0.13	0	7.5	0	7.1	4.8	416	-7.6	-48	15.8	6.8	9	14.8	10.2	12.9	18.6	29.9	42.2	53.4	2.465	2.624	4.137	4.771	9.373	9.368	12.048	15.057	20.015
1191	25	2020-06-23	1.91958e+06	5.6069e+06	46	9.3	22	2.6	158	22	18.8	0	0	25	0.08	0.13	0	6.6	0	7.2	4.8	397	-7.6	-48	15.3	6.3	8.6	15.4	13.3	15.2	20.3	33.2	42.6	51.8	2.113	2.636	4.137	4.763	9.591	9.369	11.98	15.02	20.015
1459	78	2010-12-14	1.93224e+06	5.60394e+06	33	5.6	14.2	1.7	124	22	12.1	0.8	0.1	21	0.08	0.13	0.1	0	0.1	7.8	0.3	291	-7.6	-48	15.3	9.9	12.8	18.8	24.4	26.7	31.4	44.8	55.3	64.4	19.412	21.083	26.584	33.45	42.95	54.737	64.636	79.484	88.115
1459	78	2011-03-09	1.93224e+06	5.60394e+06	33	5.4	15	1.5	125	21	12	0.7	0.2	21	0.08	0.13	0.1	0	0.1	7.8	0.1	292	-7.6	-48	14.8	26.6	29.5	29.9	33.7	38.7	46.8	59.8	74.3	81.2	24.088	30.347	30.647	34.51	42.305	54.826	64.557	79.265	88.088
1459	78	2011-06-09	1.93224e+06	5.60394e+06	33	6.1	14.6	1.6	124	20	13.4	0.6	0.2	19.7	0.08	0.13	0.1	0	0.1	7.9	0.9	289	-7.6	-48	14.1	9.3	12	28	37.3	46.7	59.4	74.8	88.9	97.5	15.433	20.547	24.141	28.343	44.475	54.746	64.573	79.099	88.085
1459	78	2012-03-06	1.93224e+06	5.60394e+06	33	5.2	13.8	1.6	124	24	11.1	0.8	0.1	19.9	0.08	0.13	0.1	0	0.1	7.8	0.3	277	-7.6	-48	15	15.8	18.5	23.2	25	31.8	40.4	51.5	64.1	72.8	15.564	20.656	23.661	28.149	43.704	54.745	64.075	79.3	88.081
1459	78	2012-06-19	1.93224e+06	5.60394e+06	36	6	16.2	1.8	126	22	11.7	1.3	0.2	17.8	0.08	0.13	0.2	0	0.1	7.9	0.1	288	-7.6	-48	13.5	34.9	34.5	34.6	42.4	55.3	68	76.6	88.9	95.5	27.2	31.488	29.629	37.491	43.061	54.539	63.833	70.51	77.783
1459	78	2012-09-24	1.93224e+06	5.60394e+06	35	5.7	14.5	1.6	123	22	13.6	0.4	0.1	21	0.08	0.13	0.1	0	0.1	7.7	0.2	285	-7.6	-48	14.5	20.4	25.8	27.3	31.4	38.5	48.9	61.6	72.7	80.2	15.648	21.136	26.743	33.696	42.841	54.568	64.624	79.276	88.081
1459	78	2012-12-20	1.93224e+06	5.60394e+06	34	5.8	16.1	1.7	124	21	13	0	0.1	20	0.08	0.13	0.1	0.1	0.1	7.7	0.2	287	-7.6	-48	14.9	18.6	21.8	28.1	28.6	36.6	43	55.2	65.8	72.8	18.045	21.546	23.901	27.552	34.305	37.767	46.742	57.222	66.237
1459	78	2013-08-25	1.93224e+06	5.60394e+06	35	5.6	16.2	1.8	124	21	14.5	0.3	0.1	21	0.08	0.13	0.1	0	0.1	7.9	0.2	294	-7.6	-48	14.2	19.1	24	27.4	33.6	39.6	48.2	56.4	67.3	73.8	19.925	24.509	26.846	32.928	42.379	54.571	64.557	79.526	88.103
1459	78	2013-12-09	1.93224e+06	5.60394e+06	32	4.9	15.8	1.8	126	21	13.3	0.9	0.1	21	0.08	0.13	0.1	0	0.1	7.7	0.2	288	-7.6	-48	14.9	26.6	28.2	27.8	28.6	35.3	42.4	57.1	71.3	78.1	20.01	24.969	26.72	32.63	42.527	54.737	64.636	79.54	88.103
1459	78	2014-03-10	1.93224e+06	5.60394e+06	35	5.5	16.2	1.9	125	22	13.7	0.3	0.1	21	0.08	0.13	0.1	0	0.1	7.8	0.2	287	-7.6	-48	15.2	13.8	18.1	22.7	24.9	26.7	33.1	41.6	50.6	58.6	20.002	24.499	26.606	32.675	42.896	54.737	64.636	79.531	88.119
1459	78	2014-06-18	1.93224e+06	5.60394e+06	34	5.6	14.8	1.8	127	22	12	1.5	0.2	18	0.08	0.13	0.3	0	0.1	7.8	0.1	288	-7.6	-48	14	42.1	45.2	46.7	44.7	55.8	70.4	78.6	89.7	94.9	23.571	29.542	27.966	35.342	43.061	54.539	63.833	71.168	77.853
1459	78	2014-09-10	1.93224e+06	5.60394e+06	35	6.3	17.3	1.6	123	21	14.1	0.2	0.1	21	0.08	0.13	0.1	0.1	0.1	7.7	0.2	293	-7.6	-48	14.4	13.7	17.9	25.7	29.4	38.2	48.7	59.1	71.4	80.2	15.701	21.164	26.743	33.102	42.595	54.582	64.624	79.276	88.041
1459	78	2014-12-02	1.93224e+06	5.60394e+06	35	6.3	17.2	1.8	125	21	12.7	0.1	0.1	22	0.08	0.13	0.1	0.2	0.1	7.7	0.2	293	-7.6	-48	15.1	21.8	25.8	27.5	28.6	35	40.7	55.4	66.2	73.8	20.052	24.982	26.803	32.081	42.5	54.632	64.636	79.536	88.079
1459	78	2015-03-06	1.93224e+06	5.60394e+06	34	6	17.1	1.8	126	21	13.3	0.1	0.1	21	0.08	0.13	0.1	0.2	0.1	7.7	0.2	290	-7.6	-48	14.7	23.7	27.1	30.3	32.6	39	47.3	59.7	70.4	78.5	20.028	24.987	26.821	32.034	42.059	54.589	64.557	79.53	88.064
1459	78	2015-06-19	1.93224e+06	5.60394e+06	35	5.7	16.5	1.8	126	22	13.1	1	0.2	20	0.08	0.13	0.1	0.1	0.1	7.8	0.2	291	-7.6	-48	14.1	25.6	29.7	30.3	38.5	47.6	57.9	68.5	80.7	88.2	20.05	24.096	23.696	27.846	29.936	34.387	47.35	56.36	66.048
1459	78	2015-09-09	1.93224e+06	5.60394e+06	35	6.3	16.9	1.8	124	22	14.5	0.3	0.1	22	0.08	0.13	0.1	0.1	0.1	7.7	0.3	293	-7.6	-48	14.4	15.3	17.9	23.5	28.2	36.5	45.8	55.7	68	75.9	19.991	24.99	26.846	32.313	41.983	54.468	64.557	79.531	88.064
1459	78	2015-12-02	1.93224e+06	5.60394e+06	35	6.1	15.5	1.8	123	20	14.2	0.1	0.1	21	0.08	0.13	0.1	0.1	0.1	7.8	0.2	291	-7.6	-48	15	13.6	16.9	24.4	26.6	32	39.5	51.5	63.5	72.2	20.018	24.509	26.821	32.032	42.059	54.745	64.636	79.53	88.064
1459	78	2016-03-08	1.93224e+06	5.60394e+06	33	5.2	15.7	1.8	126	21	13.7	0.1	0.1	22	0.08	0.13	0.1	0.2	0.1	7.8	0.1	298	-7.6	-48	14.6	33.7	33.9	35.1	34.8	42.2	49.2	60.2	68.5	77.1	26.464	31.087	32.527	34.332	41.909	54.462	64.557	79.497	88.064
1459	78	2016-06-08	1.93224e+06	5.60394e+06	34	6.1	16	1.8	128	21	13	1	0.2	21	0.08	0.13	0.1	0	0.1	8	0.2	297	-7.6	-48	14	23.2	27	27.7	33.8	42.8	49.7	64.2	78.1	84.1	19.895	24.079	26.764	32.937	42.508	54.572	64.557	79.526	88.067
1459	78	2016-09-27	1.93224e+06	5.60394e+06	33	5.8	17.3	1.7	123	21	14.4	0.1	0.1	21	0.08	0.13	0.1	0.2	0.1	7.8	0.1	296	-7.6	-48	14.4	28.2	30.2	31.8	36.4	39.9	50.7	59.6	67.7	76.1	26.188	31.084	30.874	34.827	41.689	54.576	64.557	79.45	88.064
1459	78	2016-12-07	1.93224e+06	5.60394e+06	34	6.1	15.3	1.7	126	22	15.5	0	0.1	21	0.08	0.13	0.1	0.1	0.1	7.8	0.1	296	-7.6	-48	15.6	24	23.7	26.3	25.3	31.5	37.6	48.3	54.5	63.8	24.139	31.062	30.774	34.592	42.206	54.691	64.532	79.46	88.073
1459	78	2017-03-08	1.93224e+06	5.60394e+06	33	5.5	14.9	1.7	128	20	11.7	1.1	0.2	20	0.08	0.13	0.1	0	0.1	7.8	0.1	290	-7.6	-48	14.6	29.6	30.4	30.4	35.6	39	49.3	59.6	73.9	80.7	26.154	30.355	27.586	32.668	43.098	54.566	63.833	70.773	77.898
1459	78	2017-06-29	1.93224e+06	5.60394e+06	35	5.7	16.2	1.9	128	20	10.9	0.7	0.1	14.1	0.08	0.13	0.2	0	0.1	8	0.2	287	-7.6	-48	14.2	26.8	28.4	33.2	39.7	46.8	59.2	72.9	86	93.9	19.622	21.435	23.818	28.343	43.154	54.558	63.929	79.403	88.097
1459	78	2017-09-05	1.93224e+06	5.60394e+06	34	6.1	16.8	1.9	125	22	13.5	0.2	0.2	22	0.08	0.13	0	0	0.1	7.8	0.1	292	-7.6	-48	15.3	34.3	35.3	30.6	28	28.8	35.8	42.1	46.9	55.8	24.742	30.367	30.706	34.448	39.706	54.62	65.624	79.614	88.119
1459	78	2017-12-05	1.93224e+06	5.60394e+06	33	6.1	16.1	1.8	123	22	14.1	0	0.1	23	0.08	0.13	0.1	0.2	0.1	7.7	-0.1	296	-7.6	-48	14.9	16.8	19.2	26.4	25.9	34.1	41.3	50.8	58.7	66.8	27.394	32.175	32.571	34.342	41.928	54.55	64.532	79.478	88.057
1459	78	2018-03-06	1.93224e+06	5.60394e+06	34	5.7	15.7	1.7	128	20	11.7	0.9	0.2	20	0.08	0.13	0	0	0.1	7.8	0	292	-7.6	-48	15.2	9.6	12.5	17.5	23.4	26.5	32.3	36.6	45.1	51.9	25.175	30.344	27.658	32.249	40.447	54.739	64.9	79.561	88.119
1459	78	2018-06-13	1.93224e+06	5.60394e+06	35	5.8	16.8	1.8	125	21	14	0.6	0.2	22	0.08	0.13	0	0	0.1	7.8	0	293	-7.6	-48	14.2	9.8	9.6	16.9	22.5	30.5	35.1	38.6	47.1	52.9	25.385	30.371	30.865	34.648	38.371	54.455	65.545	79.609	88.103
1459	78	2018-09-04	1.93224e+06	5.60394e+06	35	5.8	16.5	1.8	122	19.7	14.5	0	0.1	21	0.08	0.13	0.1	0.2	0.1	7.7	0.6	291	-7.6	-48	14.1	8.1	9.4	20.1	30	34.6	45.4	55.6	67.1	77	18.697	21.359	26.649	32.224	41.955	54.737	65.031	79.536	88.066
1459	78	2018-12-04	1.93224e+06	5.60394e+06	34	5.9	16.7	1.8	123	21	13.9	0	0.1	22	0.08	0.13	0.1	0.1	0	7.8	0.4	298	-7.6	-48	16.1	13	18.8	20.4	21.7	27	31.5	44.9	56.3	65.9	7.208	12.87	15.641	20.524	20.934	26.614	37.683	47.433	52.93
1459	78	2019-06-04	1.93224e+06	5.60394e+06	37	5.8	14.9	1.8	126	20	14.2	0.6	0.2	20	0.08	0.13	0.1	0	0.1	7.9	0.1	296	-7.6	-48	14.2	32.2	33.1	31.4	39.8	43.2	52.6	63.6	73.6	80.8	26.335	30.372	27.597	32.966	42.95	54.564	63.833	70.749	77.877
1459	78	2019-09-17	1.93224e+06	5.60394e+06	34	5.8	15.6	1.8	122	21	13.9	0.5	0.2	21	0.08	0.13	0.1	0.2	0.1	7.9	0.3	287	-7.6	-48	14.1	12.4	16.5	27	37.5	44.7	55.1	65.4	76.5	85	19.987	24.114	26.764	32.328	41.911	54.58	64.557	79.531	88.059
1459	78	2019-12-19	1.93224e+06	5.60394e+06	36	6.1	15.1	1.8	120	21	15	0	0.1	22	0.08	0.13	0.1	0.1	0	7.8	2.5	295	-7.6	-48	16.3	6.4	10	15.4	19.2	25.8	28.6	39.1	48.7	57.3	8.388	12.667	15.542	20.527	20.934	26.612	37.721	47.478	52.982
1459	78	2020-03-18	1.93224e+06	5.60394e+06	35	6	15.9	1.7	127	20	13.8	0	0.1	21	0.08	0.13	0	0.1	0	7.9	0.6	285	-7.6	-48	15.2	6.4	7.5	9.6	13.5	20.2	25.5	36.1	45.1	55.1	5.455	10.882	15.512	20.075	21.853	26.59	37.551	47.39	52.982
1459	78	2020-06-22	1.93224e+06	5.60394e+06	35	6.2	15.8	1.8	126	20	13.4	0.9	0.2	21	0.08	0.13	0.1	0	0.1	7.7	0.4	294	-7.6	-48	14.2	7.4	9	19.4	28.3	35.9	43.9	56.2	68.7	77	20.019	23.622	26.53	32.938	42.418	54.724	65.135	79.529	88.117
1674	31	2010-12-14	1.92868e+06	5.60842e+06	19.2	3.1	8.1	1.2	73	7.6	11	0	0	18.2	0.08	0.13	0	0.3	0	7.3	5	167	-7.6	-48	14.9	2	2	2.5	5.1	6.1	6.6	10.2	14.2	18	0.576	0.855	1.477	1.568	3.228	4.321	6.352	31.75	33.273
1674	31	2011-03-09	1.92868e+06	5.60842e+06	19.3	3.1	8.7	1.2	74	7.6	9.6	0	0	18.3	0.08	0.13	0	0.3	0	7.7	4.8	168	-7.6	-48	14.7	2.5	2.2	2.5	6.7	7.5	9.9	14.8	19.7	24.9	1.476	1.584	2.44	2.767	5.519	7.559	10.713	16.216	32.198
1674	31	2011-06-09	1.92868e+06	5.60842e+06	18.8	3.3	8.3	1.1	74	7.2	9.7	0	0	17.5	0.08	0.13	0	0.3	0	7.6	4.8	166	-7.6	-48	14.5	2.4	2.4	2.7	7.9	10.1	14.8	23.8	28.2	36.7	1.553	1.551	2.422	4.175	6.327	8.501	12.729	18.164	32.518
1674	31	2011-09-28	1.92868e+06	5.60842e+06	20	3.3	9.8	1.3	75	7.4	9.2	0.1	0	17.9	0.08	0.13	0	0.3	0	7.4	3.2	164	-7.6	-48	14.6	2.5	2.7	3.3	8.6	14.1	12.4	19.5	27.5	33.4	1.831	2.298	3	4.004	4.817	8.231	11.852	18.165	32.474
1674	31	2011-12-05	1.92868e+06	5.60842e+06	19.3	3	9	1.2	75	6.8	11.6	0.1	0	18.1	0.08	0.13	0	0.3	0	7.7	4	162	-7.6	-48	17.3	0.5	0.2	0.1	1.5	0.6	2	0.8	2.2	23.4	0.145	0.173	0.547	0.423	2.103	1.659	2.62	2.67	8.525
1674	31	2012-03-07	1.92868e+06	5.60842e+06	18.8	2.9	8.5	1.1	78	7.2	9.7	0	0	16.6	0.08	0.13	0	0.3	0	7.4	5.2	162	-7.6	-48	15.6	1.8	2.1	2.3	2.6	2.8	4.6	8	11.7	16	0.715	0.785	1.477	1.589	3.526	4.324	6.83	31.709	33.355
1674	31	2012-06-20	1.92868e+06	5.60842e+06	19.9	3.1	9.2	1.2	74	7.1	9.8	0	0	17.2	0.08	0.13	0	0.4	0	7.6	5.1	164	-7.6	-48	14.5	2.6	2.6	3.7	9.3	13.7	17.4	22.6	26.9	34.5	1.544	1.554	2.422	4.16	5.519	8.244	11.956	17.667	32.656
1674	31	2012-09-25	1.92868e+06	5.60842e+06	19.8	3.1	8.8	1.2	74	7	10.4	0	0	17.6	0.08	0.13	0	0.3	0	7.5	5.1	162	-7.6	-48	14.8	2.1	2.2	2.5	6.5	6.8	10	16.3	22.6	28.9	0.564	0.87	1.477	1.591	3.228	4.322	6.352	31.754	33.422
1674	31	2012-12-12	1.92868e+06	5.60842e+06	19	3.1	8.7	1.2	74	7.4	10.7	0	0	17.9	0.08	0.13	0	0.4	0	7.4	5.2	166	-7.6	-48	15.1	1.9	1.7	2.2	3.7	3.7	6.5	10.6	16.4	20.7	0.546	0.816	1.477	1.579	3.228	4.321	6.352	31.657	33.382
1674	31	2013-08-16	1.92868e+06	5.60842e+06	19.2	3	10.3	1.3	76	6.5	15.8	0	0	18.3	0.08	0.13	0	0.4	0	7.5	4.9	170	-7.6	-48	14.6	2.5	2.6	3.5	8.4	12	16.5	20.9	25.6	33.4	0.809	0.924	1.563	2.284	4.325	4.689	16.29	31.6	33.828
1674	31	2013-12-10	1.92868e+06	5.60842e+06	20	3	9	1.2	77	5.8	9.8	0	0	18.2	0.08	0.13	0	0.7	0	7.1	4.9	165	-7.6	-48	15	2.2	2	2.8	4.2	4.5	8	13	18.4	25.2	0.847	0.906	1.735	2.267	4.416	4.645	16.451	31.763	34.007
1674	31	2014-03-13	1.92868e+06	5.60842e+06	19.3	3.1	8.9	1.1	78	6.2	9.5	0	0	18.2	0.08	0.13	0	0.4	0	7.4	4.8	166	-7.6	-48	14.9	2.2	2.4	2.7	4.2	6.7	10	17	24.1	30.1	0.944	1.271	2.026	2.429	4.751	7.547	18.355	23.791	32.852
1674	31	2014-06-23	1.92868e+06	5.60842e+06	19.4	3.2	9.1	1.3	77	6.3	9.7	0	0	18.2	0.08	0.13	0	0.4	0	7.4	5	168	-7.6	-48	14.4	2.8	3.1	4.2	9.8	14.5	23.7	31.6	39.7	48.9	1.447	1.695	3.489	5.914	5.876	8.332	19.036	23.953	33.275
1674	31	2014-09-12	1.92868e+06	5.60842e+06	19.3	3.1	9.7	1.2	77	6.2	9.4	0	0	19.3	0.08	0.13	0	0.4	0	7.4	4.7	166	-7.6	-48	14.7	2.5	2.5	2.9	6.3	8.4	12.3	22.1	27.5	36.1	1.371	1.703	2.68	3.433	5.701	8.224	19.036	23.76	32.849
1674	31	2015-03-05	1.92868e+06	5.60842e+06	21	3.2	9.5	1.2	79	7.1	9	0	0	17.8	0.08	0.13	0	0.4	0	7.8	4.9	170	-7.6	-48	15.9	1.5	1.7	1.7	2.2	2.3	2.7	3.3	3.9	4.8	0.257	0.103	0.764	0.646	4.173	3.962	5.665	5.27	11.695
1674	31	2015-06-18	1.92868e+06	5.60842e+06	21	3.3	9.7	1.3	78	7.5	9.6	0	0	18.7	0.08	0.13	0	0.4	0	7.4	4.6	175	-7.6	-48	14.1	3.1	3.2	4.4	11.4	16.2	24.8	31.7	38.8	47.6	1.558	1.631	3.244	8.262	11.826	8.954	12.164	17.999	33.021
1674	31	2015-09-10	1.92868e+06	5.60842e+06	22	3.6	9.9	1.3	78	7.2	9.7	0	0	18.3	0.08	0.13	0	0.4	0	7.4	4.7	173	-7.6	-48	14.7	2.6	2.6	3.5	7.6	9	11.6	19.6	25.2	32.7	1.521	1.566	2.43	2.823	5.655	7.561	10.419	16.396	32.448
1674	31	2015-12-02	1.92868e+06	5.60842e+06	21	3.6	9.9	1.3	78	6.9	10.1	0	0	18.4	0.08	0.13	0	0.4	0	7.5	4.5	174	-7.6	-48	15.3	2	2	2.5	3.1	3.7	5.4	10.4	14.9	20.2	0.421	0.093	0.538	0.226	3.602	3.596	4.889	4.854	11.497
1674	31	2016-03-18	1.92868e+06	5.60842e+06	22	3.5	9.7	1.2	80	7.3	10	0	0	20	0.08	0.13	0	0.5	0	7.9	4.3	180	-7.6	-48	15.1	2.2	2.2	2.8	4.4	5.1	6.9	16.4	22.9	28.2	2.688	2.696	3.099	4.732	6.647	8.591	12.305	18.09	32.848
1674	31	2016-06-09	1.92868e+06	5.60842e+06	21	3.5	9.7	1.3	83	7.4	10.4	0	0	18.7	0.08	0.13	0	0.4	0	7.5	4	182	-7.6	-48	14.4	2.6	3.1	3.9	9.7	13.9	18.4	25.6	32.6	39.9	1.188	1.292	2.614	3.948	6.013	8.292	11.662	17.494	32.851
1674	31	2016-09-28	1.92868e+06	5.60842e+06	20	3.4	9.8	1.2	84	6.8	10.6	0	0	18.3	0.08	0.13	0	0.4	0	7.6	4.1	179	-7.6	-48	14.4	2.6	3	3.9	9.1	13.2	19.8	25.2	30.3	38.8	1.363	1.593	3.215	5.969	6.28	8.687	12.282	18.156	32.914
1674	31	2016-12-08	1.92868e+06	5.60842e+06	21	3.4	8.9	1.2	86	6.9	10.3	0	0	18.7	0.08	0.13	0	0.4	0	7.7	4.2	182	-7.6	-48	14.7	2.4	2.4	3	6.7	8.8	11.6	20.5	25.6	33.1	1.308	1.593	2.44	2.752	6.127	7.901	12.091	16.929	32.624
1674	31	2017-03-08	1.92868e+06	5.60842e+06	21	3.4	9	1.2	84	7.1	9.6	0	0	18.5	0.08	0.13	0	0.6	0	7.6	3.8	182	-7.6	-48	14.5	2.5	2.8	3.5	8.2	11.4	15.4	23.7	30.6	38.2	1.764	2.147	3	5.004	6.127	8.508	12.305	18.031	33.241
1674	31	2017-09-06	1.92868e+06	5.60842e+06	22	3.6	9.4	1.2	84	7.5	10	0.1	0	19.8	0.08	0.13	0	0.4	0	7.5	4	183	-7.6	-48	14.7	2.3	2.4	2.8	6.1	7.4	9.2	17.6	24.1	30.5	1.958	2.339	3.009	4.287	5.533	8.291	11.852	17.62	32.855
1674	31	2017-12-06	1.92868e+06	5.60842e+06	22	3.8	9.2	1.2	84	7.3	8.8	0	0	19.7	0.08	0.13	0	0.4	0	7.6	4.3	187	-7.6	-48	15	2.4	2.4	3.2	4.7	4.6	8.8	16.6	22.7	30	2.125	2.618	3.009	4.216	5.921	8.321	11.956	17.641	32.848
1674	31	2018-03-07	1.92868e+06	5.60842e+06	22	3.5	9.7	1.3	85	7.2	9.9	0	0	20	0.08	0.13	0	0.4	0	7.6	5.3	184	-7.6	-48	16.1	1.3	1.5	1.4	2	1	0.8	2.4	4.7	5.8	2.114	2.613	3.009	4.278	5.598	8.245	11.956	17.549	32.755
1674	31	2018-06-14	1.92868e+06	5.60842e+06	22	3.5	9.9	1.3	85	8.1	10.1	0	0	19.2	0.08	0.13	0	0.9	0	7.6	4.3	188	-7.6	-48	15	2.1	2.2	2.9	4.6	5.1	6.3	13.1	19.2	24.1	0.567	0.877	1.485	2.012	4.677	7.631	9.075	16.049	32.378
1674	31	2018-09-05	1.92868e+06	5.60842e+06	22	3.6	10.1	1.3	83	7.6	9.5	0	0	18.2	0.08	0.13	0	0.5	0	7.5	4.5	183	-7.6	-48	12.5	3.4	3.8	5.4	19.7	31	44.3	52.6	57.4	64.5	1.925	2.211	4.063	8.706	11.32	8.953	12.186	18.269	33.13
1674	31	2018-12-05	1.92868e+06	5.60842e+06	22	3.6	10	1.3	84	7.5	9.4	0	0	19.3	0.08	0.13	0	0.4	0	7.5	4.8	187	-7.6	-48	16.4	1.2	1.2	1.3	1.4	1	0.1	0.1	1.5	1	0.455	0.832	1.485	1.99	4.327	4.662	6.319	31.366	33.579
1799	28	2010-12-14	1.93594e+06	5.60851e+06	17.8	3.5	9.2	1.3	74	7.6	10.2	0.1	0	13.8	0.08	0.13	0	0	0	7.5	0.1	163	-7.6	-48	15.1	3.6	4.7	2.9	10.2	8.5	10.9	17.6	25.8	35.4	0.844	0.918	1.609	9.11	12.03	27.635	25.865	36.998	42.761
1799	28	2011-03-09	1.93594e+06	5.60851e+06	17.8	3.4	9	1.2	75	6.8	9.2	0.1	0	13.8	0.08	0.13	0	0	0	7.6	0.1	162	-7.6	-48	15.3	5	5.3	4.7	15.1	16.6	11.3	22	45.9	54.2	1.197	1.266	1.892	9.217	12.03	27.648	25.865	36.948	42.797
1799	28	2011-06-09	1.93594e+06	5.60851e+06	17.3	3.6	9.2	1.1	75	6.2	9.6	0	0	13.2	0.08	0.13	0	0	0	7.7	1.3	162	-7.6	-48	14.1	3.2	3.2	3.4	14.6	28.2	33.3	47.7	60.4	69.1	1.489	1.731	3.464	15.464	27.214	33.273	37.776	46.299	54.772
1799	28	2011-09-28	1.93594e+06	5.60851e+06	18.2	3.5	10.6	1.3	75	7	9.6	0.3	0	13	0.08	0.13	0	0	0	7.6	0.3	160	-7.6	-48	14.3	3.1	3.3	3.3	18.1	24.1	28.3	39.7	51.9	59.2	1.816	2.346	4.562	18.696	25.241	30.893	37.78	46.898	54.877
1799	28	2011-12-05	1.93594e+06	5.60851e+06	17.2	3	9.5	1.1	76	6.7	7.9	1.1	0	13	0.08	0.13	0	0	0	7.7	0.1	154	-7.6	-48	17.2	5.6	4	3.9	7.3	3.4	4.3	10.3	28.2	47.4	0.761	0.903	2.149	9.358	11.925	27.735	26.14	36.971	42.819
1799	28	2012-03-07	1.93594e+06	5.60851e+06	16.7	3.2	9.1	1.1	82	6.8	9.5	0.1	0	12.3	0.08	0.13	0	0	0	7.7	0.2	158	-7.6	-48	14.6	4.9	6.4	4	12.9	15.4	18	34.8	45.3	55.7	1.748	2.303	3.124	9.867	13.281	27.827	37.577	47.956	58.099
1799	28	2012-06-20	1.93594e+06	5.60851e+06	18.8	3.5	10.1	1.3	75	6.4	9.6	0.1	0	12.6	0.08	0.13	0	0	0	7.6	0.2	161	-7.6	-48	14.2	3.6	4.4	4.2	16.9	22.5	26.1	38.6	45.7	55.1	1.801	2.347	4.125	16.275	25.228	30.873	37.78	46.897	54.856
1799	28	2012-09-26	1.93594e+06	5.60851e+06	17.5	3.4	9.9	1.2	75	6.6	10.6	0.1	0	12.8	0.08	0.13	0	0	0	7.6	0.1	159	-7.6	-48	15.2	5.2	6.5	3.5	16.3	11.1	11.2	22.8	41.3	52.8	0.933	1.261	1.984	9.176	11.275	9.496	20.444	33.797	33.827
1799	28	2012-12-11	1.93594e+06	5.60851e+06	18.7	3.4	9.7	1.2	75	7.3	10.1	0.1	0	13.7	0.08	0.13	0	0	0	7.5	0.2	163	-7.6	-48	15.5	4.9	4.9	3.9	6.5	10	9	15.7	19.8	39	0.702	0.914	1.601	9.032	12.045	27.645	25.865	36.933	42.83
1799	28	2013-08-21	1.93594e+06	5.60851e+06	17.3	3.2	9.2	1.2	76	6.5	10.3	0.1	0	13.1	0.08	0.13	0	0	0	7.8	1.3	164	-7.6	-48	16.9	1.7	1.7	1.3	2.6	2.6	2.3	10.1	30.9	49.8	0.355	0.184	0.946	7.731	13.044	27.646	37.577	47.713	59.759
1799	28	2013-12-11	1.93594e+06	5.60851e+06	18.1	3.5	10.9	1.4	76	6.4	9.5	0.1	0	13.7	0.08	0.13	0	0	0	7.5	0.2	158	-7.6	-48	15.4	4.2	5.5	2.6	6.6	6.7	7.3	17.1	30	41.6	1.022	1.268	1.999	9.247	11.358	9.428	20.15	33.795	33.833
1799	28	2014-02-10	1.93594e+06	5.60851e+06	17.7	3.1	10.6	1.4	76	6.6	9.5	0.1	0	13.8	0.08	0.13	0	0	0	7.6	0.2	162	-7.6	-48	15.6	4.7	6	2.5	6.7	6.1	5.9	12.4	24.3	34	1.092	1.252	1.999	9.268	11.373	9.424	20.513	33.795	33.801
1799	28	2014-06-25	1.93594e+06	5.60851e+06	16.9	3.3	9.6	1.2	75	7.1	9.5	0	0	13.2	0.08	0.13	0	0	0	7.2	0.2	160	-7.6	-48	14.2	3.6	4.1	4.6	20	26.5	27.5	38.2	46.8	54	1.332	1.61	3.225	14.472	26.368	32.236	37.776	45.911	54.761
1799	28	2014-09-11	1.93594e+06	5.60851e+06	17.1	3.3	10.2	1.2	75	6	9.3	0	0	13.3	0.08	0.13	0	0.3	0	7.5	0.3	161	-7.6	-48	14.6	4.6	5.8	3.8	10.9	17	18.8	24.1	28.6	41.5	1.407	1.647	2.817	5.622	6.031	8.845	19.491	24.322	32.309
1799	28	2014-12-03	1.93594e+06	5.60851e+06	17.3	3.7	10.2	1.3	75	6.2	9.4	0.1	0	14.4	0.08	0.13	0	0	0	7.5	0.1	162	-7.6	-48	14.9	3.5	5.2	4.2	14.6	13.1	11.5	22.2	29.7	40	1.725	2.311	3.42	7.585	11.39	9.425	20.15	33.857	34.1
1799	28	2015-03-04	1.93594e+06	5.60851e+06	16.8	3.3	9.4	1.2	75	6	9.4	0.1	0	13.8	0.08	0.13	0	0	0	7.9	0.1	160	-7.6	-48	15.1	5.1	5.2	4	14	14.7	12.3	22.6	32.7	45.6	0.97	1.431	2.341	9.495	13.104	27.646	37.577	47.976	58.196
1799	28	2015-06-17	1.93594e+06	5.60851e+06	17.9	3.4	11	1.4	74	6.4	10.1	0.1	0	13.3	0.08	0.13	0	0.2	0	7.9	0.2	162	-7.6	-48	14	4.1	5.9	4.4	18.5	26.8	29.9	40.8	47.8	56.6	1.151	1.567	3.445	12.435	24.666	31.424	38.029	47.002	54.944
1799	28	2015-09-09	1.93594e+06	5.60851e+06	18.6	3.8	10.2	1.3	75	6.5	9.6	0.1	0	13.9	0.08	0.13	0	0	0	7.3	0.2	162	-7.6	-48	15.9	2.9	3.8	1.9	4.4	4.1	3.5	7.5	26.5	37	1.401	1.571	2.653	9.383	11.21	9.422	20.221	33.886	33.802
1799	28	2015-12-01	1.93594e+06	5.60851e+06	17.5	3.3	8.8	1.2	74	6.6	8.9	0.1	0	13.5	0.08	0.13	0	0	0	7.5	0.2	161	-7.6	-48	14.6	3.8	5.9	3.5	12.3	15.2	17	30.8	43.8	53.8	1.996	2.287	3.177	9.878	12.227	27.826	30.992	40.681	51.382
1799	28	2016-03-09	1.93594e+06	5.60851e+06	18.3	3.6	9.9	1.3	76	6.5	9.3	0	0	14.5	0.08	0.13	0	0	0	7.7	0.2	164	-7.6	-48	14.4	4	5.3	4.1	14.2	17.9	20.9	34	40.3	50	1.338	1.612	3.465	10.15	10.952	9.429	20.224	33.829	34.38
1799	28	2016-06-08	1.93594e+06	5.60851e+06	17.7	3.6	9.9	1.3	76	6.4	9.3	0	0	13.6	0.08	0.13	0	0	0	7.9	0.2	165	-7.6	-48	14.5	3.7	5.2	3.5	12.9	16.3	20.9	37.7	47.7	58.1	1.337	1.63	2.761	12.384	24.178	31.91	38.229	48.038	58.109
1799	28	2016-09-27	1.93594e+06	5.60851e+06	17.1	3.5	9.6	1.2	75	6.6	9.2	0.1	0	13.2	0.08	0.13	0	0	0	7.6	0.1	164	-7.6	-48	15.9	3.9	4.2	3.2	4.7	4.2	3.9	8.6	15.8	24.6	0.965	1.249	1.984	9.167	12.034	27.648	30.992	40.522	51.503
1799	28	2016-12-07	1.93594e+06	5.60851e+06	17.3	3.4	9.5	1.2	76	6.8	10	0	0	13.4	0.08	0.13	0	0	0	7.4	0.2	165	-7.6	-48	14.8	4.3	5.6	3.8	12.3	14.1	14.8	23.7	32.8	46.1	0.67	0.874	1.601	8.896	11.635	9.497	12.585	20.341	31.776
1799	28	2017-03-08	1.93594e+06	5.60851e+06	17.3	3.3	9.5	1.2	75	6.4	9.3	0.1	0	14.7	0.08	0.13	0	0	0	7.5	0.2	162	-7.6	-48	14.3	4.3	5.5	4.7	20.3	24.5	23.2	33.2	38.8	46.6	1.885	2.341	4.099	13.867	26.83	31.232	37.714	45.998	54.459
1799	28	2017-06-29	1.93594e+06	5.60851e+06	18.2	3.6	10.1	1.3	76	6.8	9.5	0.1	0	13.4	0.08	0.13	0	0	0	7.7	0.2	161	-7.6	-48	14.2	3.3	3.6	3.1	15.6	24.2	29.9	39.5	52.3	60.7	1.571	1.779	3.337	15.753	25.228	31.423	37.78	46.794	55.125
1799	28	2017-09-05	1.93594e+06	5.60851e+06	17.8	3.5	10.5	1.3	75	6.9	9.4	0.1	0	14	0.08	0.13	0	0	0	7.6	0	163	-7.6	-48	16.9	6.3	4.6	5.1	21.1	7	6.2	18.4	45.5	50.9	0.471	0.895	1.609	9.017	11.05	9.566	13.138	20.277	31.763
1799	28	2017-12-05	1.93594e+06	5.60851e+06	17.6	3.6	9.3	1.3	74	6.5	9.5	0	0	14.8	0.08	0.13	0	0	0	7.5	-0.1	163	-7.6	-48	15.2	6.5	5.3	2.9	20.6	13.1	10	19.4	23.5	39.5	0.975	1.137	1.999	6.428	8.297	9.555	19.959	33.805	33.804
1799	28	2018-03-06	1.93594e+06	5.60851e+06	17.6	3.4	9.8	1.2	75	6.9	9.3	0	0	14.3	0.08	0.13	0	0	0	7.6	0	164	-7.6	-48	14.4	6.7	6.2	5.9	19.5	20.5	19.6	25.5	35.9	43.5	1.761	2.176	4.035	10.537	24.116	31.391	37.897	46.973	54.77
1799	28	2018-06-13	1.93594e+06	5.60851e+06	17.4	3.5	9.8	1.2	75	7.2	9.9	0	0	14.3	0.08	0.13	0	0	0	7.7	0	164	-7.6	-48	14.6	6.6	6.6	6.3	15.9	20.8	16.3	21	27.9	35.9	1.525	1.578	2.572	6.446	8.345	9.577	12.879	20.315	31.776
1799	28	2018-09-04	1.93594e+06	5.60851e+06	17.8	3.5	10.1	1.2	74	6.6	9.3	0.1	0	14.6	0.08	0.13	0	1.3	0	7.4	1.8	161	-7.6	-48	16.6	0.7	1.1	0.2	1.7	0.8	0.1	1.1	4.3	5	0.837	0.904	1.636	2.347	3.649	4.493	16.409	32.001	33.802
1799	28	2018-12-04	1.93594e+06	5.60851e+06	17.9	3.5	10.3	1.3	75	6.5	8.4	0.1	0	14.1	0.08	0.13	0	0	0	7.6	0.1	165	-7.6	-48	16.8	5.1	3.8	3.7	5.6	1.5	3.9	2.4	10.2	25.7	0.776	0.892	1.708	9.038	11.214	9.515	20.513	33.782	33.814
1799	28	2019-03-05	1.93594e+06	5.60851e+06	17.5	3.3	9.9	1.2	75	6.9	9.4	0.1	0	14.1	0.08	0.13	0	0	0	7.8	0.2	165	-7.6	-48	15.3	3.7	4.6	2.8	9.3	11.9	8.9	21.8	30	40.6	0.901	1.295	2.06	9.174	12.088	27.648	25.865	36.935	42.819
1799	28	2019-06-04	1.93594e+06	5.60851e+06	18.3	3.3	9.3	1.3	77	6.8	9.4	0.2	0	13	0.08	0.13	0	0	0	7.6	2.3	161	-7.6	-48	18.2	0.6	0.3	0.1	1.5	0.6	2	0.8	2.2	23.4	0.726	0.895	2.105	9.163	12.293	27.631	25.865	36.983	43.241
1940	75	2010-12-06	1936871	5601730	54	11.1	40	3.3	210	40	47	0.9	0.4	35	0.08	0.13	0	0	0.4	6.8	0.4	543	-7.6	-48	14.9	24.5	27.9	26.6	31.8	38.5	47.4	65.9	77.6	86.6	20.33	22.889	26.654	32.175	41.565	53.943	66.202	79.647	88.117
1940	75	2011-03-07	1936871	5601730	56	11.8	36	3.1	210	39	42	1	0.3	32	0.08	0.13	0	0	0.5	7	0.2	510	-7.6	-48	14.8	26.1	29.3	30.6	36.2	40.7	49.5	62.7	71.9	80.8	20.15	23.968	26.888	32.18	41.087	53.869	65.545	79.661	88.123
1940	75	2011-06-07	1936871	5601730	56	11.9	42	3.3	220	51	55	1.2	0.4	36	0.08	0.13	0	0.1	0.6	7	1.1	598	-7.6	-48	14.7	18.4	26	31.5	41.4	47.8	63.1	80.2	94.5	102.6	34.662	29.055	32.977	34.395	41.755	53.608	66.118	79.435	88.03
1940	75	2011-12-07	1936871	5601730	56	10.5	38	3.2	210	44	47	0.8	0.3	35	0.08	0.13	0	0	0.5	6.8	0.3	523	-7.6	-48	14.8	23.8	26.9	24.8	33.3	36.8	47.3	66.5	78.1	89.1	20.105	23.968	26.888	32.179	41.087	53.941	65.545	79.66	88.123
1940	75	2012-03-06	1936871	5601730	60	12.2	40	3.3	220	53	52	1.1	0.4	37	0.08	0.13	0.1	0	0.6	6.8	0.3	581	-7.6	-48	14.9	34.4	38.6	37.8	40.4	51.2	64.2	79.7	93.5	99.7	36.379	30.221	33.006	34.649	44.262	53.697	64.632	79.152	88.056
1940	75	2012-06-20	1936871	5601730	67	12.8	47	3.6	220	52	54	1.4	0.4	37	0.08	0.13	0	0	0.7	6.8	0.2	593	-7.6	-48	14.8	29	31	30.2	37.2	43.4	54.8	71.5	85.7	93.4	37.323	30.22	37.039	45.68	45.267	53.601	64.861	78.486	88.056
1940	75	2012-09-24	1936871	5601730	62	11.4	40	3	220	48	53	1.3	0.4	37	0.08	0.13	0	0	0.6	6.7	0.2	585	-7.6	-48	14.9	22.8	27.2	29.5	35.3	41.3	53.2	70.7	84	92.3	20.155	23.968	26.888	32.174	41.087	53.769	65.791	79.661	88.123
1940	75	2012-12-11	1936871	5601730	58	11.2	36	3.2	210	41	42	0.9	0.3	34	0.08	0.13	0	0	0.4	6.8	0.1	518	-7.6	-48	15	29.7	32	28.4	33.6	37.6	46.1	56.6	64.1	74	23.054	29.765	30.843	34.698	40.865	53.752	65.624	79.633	88.123
1940	75	2013-08-26	1936871	5601730	65	11.8	46	3.6	230	48	55	1.8	0.4	37	0.08	0.13	0	0	0.6	6.9	3.8	604	-7.6	-48	15.2	7.2	8.7	20	33.3	43.8	54.8	73	90	97.2	21.536	27.883	31.166	34.862	42.899	53.757	66.583	79.689	88.153
1940	75	2013-12-09	1936871	5601730	57	10.2	41	3.3	220	43	50	1	0.3	38	0.08	0.13	0	0	0.5	6.7	0.3	567	-7.6	-48	14.7	30.2	33.2	33.5	38.1	46.9	56.9	76.8	88.9	96.6	20.105	23.977	26.888	32.178	41.087	53.676	65.545	79.659	88.123
1940	75	2014-03-10	1936871	5601730	46	8.4	30	2.9	192	28	26	0.7	0.3	33	0.08	0.13	0	0	0.4	6.9	0.2	426	-7.6	-48	14.9	30.1	32.3	28.8	34.9	39.5	45.1	54.9	61.5	71.3	20.024	23.926	26.894	32.187	41.087	53.841	65.624	79.645	88.103
1940	75	2014-06-18	1936871	5601730	60	11.7	37	3.3	220	47	50	1	0.4	36	0.08	0.13	0	0	0.6	7	0.1	581	-7.6	-48	14.8	45.1	45	39.2	41.2	48.6	58.6	75	88	95.3	23.131	29.077	30.843	34.673	40.865	53.852	65.545	79.641	88.123
1940	75	2014-09-10	1936871	5601730	61	12.9	48	3.3	220	47	52	1.3	0.4	37	0.08	0.13	0	0	0.6	6.6	0.2	597	-7.6	-48	14.9	25.3	30.3	36	36	47	57.4	72.6	86.2	92.7	20.155	23.968	26.888	32.173	41.087	53.557	65.624	79.661	88.123
1940	75	2014-12-02	1936871	5601730	52	10.8	37	3.2	200	35	35	0.7	0.3	35	0.08	0.13	0	0	0.4	6.7	0.2	497	-7.6	-48	15	30.2	34.4	32.5	35.1	39.5	47.2	62.9	74.7	83.1	20.027	23.925	26.888	32.188	41.087	53.842	65.624	79.646	88.103
1940	75	2015-03-06	1936871	5601730	45	9.4	32	2.9	191	27	26	0.6	0.3	33	0.08	0.13	0	0	0.4	6.9	0.2	421	-7.6	-48	14.9	27.9	30.4	24.3	34.5	35.2	40.7	49.2	56.9	64	20.086	23.956	26.894	32.188	41.087	54.101	65.624	79.645	88.103
1940	75	2015-06-16	1936871	5601730	67	11.5	39	3.5	230	45	44	1	0.4	36	0.08	0.13	0	0	0.6	6.9	0.2	582	-7.6	-48	14.8	33.1	36.6	34.6	40.4	46.7	57.8	76.9	88.1	96.3	21.645	29.081	30.843	34.696	40.865	53.857	65.577	79.684	88.123
1940	75	2015-09-08	1936871	5601730	60	11.8	40	3.2	230	47	46	1	0.4	36	0.08	0.13	0	0	0.6	7	0.2	583	-7.6	-48	14.8	32.7	35.5	36.8	39.6	46.5	56.1	75.6	88	96.4	20.155	23.968	26.888	32.173	41.087	53.862	65.545	79.661	88.123
1940	75	2015-12-02	1936871	5601730	53	10.7	34	3	210	35	34	0.7	0.3	34	0.08	0.13	0	0	0.4	6.8	0.2	504	-7.6	-48	14.8	30.9	34.1	33.3	37.2	40.8	49.6	66.4	78.4	88.4	20.027	23.925	26.888	32.185	41.087	53.943	65.545	79.646	88.103
1940	75	2016-03-08	1936871	5601730	42	8	29	2.7	186	25	24	0.5	0.3	33	0.08	0.13	0	0	0.3	6.9	0.1	416	-7.6	-48	14.9	30.7	32.7	29.7	34.3	38.2	43.6	53.2	61.7	69.6	24.87	30.271	30.843	34.528	40.865	54.206	65.624	79.625	88.103
1940	75	2016-06-07	1936871	5601730	50	9.8	32	2.9	210	30	25	0.7	0.3	36	0.08	0.13	0	0	0.5	7	0.2	474	-7.6	-48	14.9	29	32.3	32.2	36.7	40.9	47	63	72.6	80.8	20.026	23.969	26.894	32.186	41.087	53.84	65.624	79.645	88.103
1940	75	2016-09-26	1936871	5601730	59	12.4	43	3.2	230	43	40	1.1	0.4	36	0.08	0.13	0	0	0.6	6.9	0.1	570	-7.6	-48	14.8	40.3	42.1	38.7	39.5	47.8	59.3	73.9	87.4	94.4	23.139	29.077	30.843	34.666	40.865	53.642	65.545	79.64	88.123
1940	75	2016-12-06	1936871	5601730	46	9.8	31	2.8	200	29	28	0.6	0.3	33	0.08	0.13	0	0.4	0.4	6.8	0.1	451	-7.6	-48	14.9	30.8	34.4	33	37.6	39.6	48	56.2	64.9	73.1	22.969	29.82	30.843	34.702	40.397	53.844	65.624	79.625	88.064
1940	75	2017-03-07	1936871	5601730	44	8.4	28	2.8	198	26	20	1	0.3	34	0.08	0.13	0	0.1	0.4	6.9	0.1	424	-7.6	-48	15.3	36	37.5	30.4	35.1	33.6	41.5	51.2	61.4	68.4	22.969	29.787	30.811	34.753	41.073	54.093	65.624	79.626	88.079
1940	75	2017-06-28	1936871	5601730	58	11.9	40	3.3	240	41	36	1.1	0.4	36	0.08	0.13	0	0	0.5	6.9	0.1	554	-7.6	-48	14.8	30.4	34.9	30	37.9	40.8	53	63.3	73.8	83	23.183	29.077	30.843	34.666	40.865	53.846	65.545	79.64	88.123
1940	75	2017-09-05	1936871	5601730	59	10.7	39	3.3	230	44	38	1.1	0.4	38	0.08	0.13	0	0	0.5	6.8	0.1	564	-7.6	-48	14.8	37.9	39.4	34.9	39.2	45.4	57.9	74.5	86.8	94.4	23.074	29.077	30.843	34.672	40.865	53.925	65.545	79.634	88.123
1940	75	2017-12-05	1936871	5601730	48	9.5	32	2.9	200	28	25	0.6	0.3	34	0.08	0.13	0	0.5	0.4	6.9	0.1	439	-7.6	-48	14.9	16	19.5	20.5	34	29	35.2	39.4	45.9	53.7	22.971	29.821	30.843	34.699	40.397	53.844	65.624	79.625	88.064
1940	75	2018-03-06	1936871	5601730	44	8.6	30	2.7	191	24	23	0.5	0.3	34	0.08	0.13	0	0.1	0.3	7	0.1	423	-7.6	-48	15	15.3	19.1	17.2	27.8	27.3	33.1	38.3	44.8	53.5	24.926	30.287	30.843	34.535	40.397	54.225	65.624	79.625	88.064
1940	75	2018-06-13	1936871	5601730	59	11.4	38	3.3	240	39	36	0.9	0.4	38	0.08	0.13	0	0	0.5	7	0.1	550	-7.6	-48	14.7	17.3	19.9	20.8	33.7	31.5	39.6	47.7	56	65.6	23.183	29.086	30.843	34.667	40.865	53.589	65.545	79.64	88.123
1940	75	2018-09-04	1936871	5601730	59	11.2	39	3.3	230	37	39	0.9	0.4	37	0.08	0.13	0	0.1	0.6	6.9	0.1	555	-7.6	-48	14.8	31.2	34	32.3	37.2	40.8	50.4	65.1	75.2	84.2	23.026	29.1	30.843	34.675	40.397	53.864	65.545	79.633	88.083
1940	75	2018-12-04	1936871	5601730	53	10.6	35	3.1	220	30	28	0.8	0.3	35	0.08	0.13	0	0	0.5	6.9	0.1	488	-7.6	-48	15	30	34.1	29.2	35.7	36.5	44.1	51.9	60.8	69.8	23.039	29.077	30.843	34.703	40.865	53.825	65.624	79.625	88.103
1940	75	2019-03-05	1936871	5601730	47	9.3	32	2.9	210	26	24	0.7	0.3	35	0.08	0.13	0	0	0.4	7	0.1	456	-7.6	-48	14.9	31.5	35.3	29.6	35.5	37.4	44.8	53.4	63.5	71.5	23.037	29.766	30.843	34.702	40.865	54.086	65.624	79.625	88.103
1940	75	2019-06-04	1936871	5601730	61	12.1	39	3.3	250	31	29	0.9	0.3	34	0.08	0.13	0	0.1	0.6	7	0.2	541	-7.6	-48	14.7	30.8	34.2	32.2	38.8	42.3	52.4	67.9	78.8	87.6	20.102	23.999	26.888	31.568	40.619	53.612	65.545	79.661	88.083
1940	75	2019-09-17	1936871	5601730	58	11.6	41	3.4	240	34	35	1	0.3	36	0.08	0.13	0	0.2	0.6	6.8	0.2	541	-7.6	-48	14.9	34.6	37.9	37.8	39.9	44.5	55.1	70.9	82.8	91.8	21.522	29.102	30.843	34.726	40.397	53.773	65.656	79.684	88.083
1940	75	2019-12-18	1936871	5601730	51	10.4	30	3	210	25	26	0.6	0.3	35	0.08	0.13	0	0.8	0.4	6.9	-0.3	434	-7.6	-48	14.7	11.1	11.2	23.7	29.4	34.8	39.6	43	49.7	55.9	23.4	29.825	30.843	34.654	40.416	53.942	65.698	79.663	88.064
1940	75	2020-03-18	1936871	5601730	45	9.8	28	2.7	185	21	21	0.4	0.3	35	0.08	0.13	0	0	0.3	7	-0.2	392	-7.6	-48	14.7	11.4	11.5	19.5	25.7	33	36.2	44.8	51.8	57	25.262	30.276	30.843	34.475	40.884	54.043	65.545	79.625	88.103
1940	75	2020-06-22	1936871	5601730	52	10.7	32	3.1	220	25	22	0.7	0.3	35	0.08	0.13	0	0	0.4	7	-0.2	459	-7.6	-48	14.7	12.9	14.4	24.8	26.9	37.4	44.1	49.8	55	64.2	23.468	29.771	30.843	34.648	40.884	53.922	65.545	79.625	88.103
3336	19	2010-12-07	1.92838e+06	5.60387e+06	37	8	18.1	2.3	129	19.9	17.6	0	0	22	0.08	0.13	0	5.5	0	7.9	0.2	347	-7.6	-48	14.3	12.6	20.2	19.8	24.5	27.6	31.1	37.5	44.8	52.7	11.264	12.483	17.881	18.762	22.707	31.51	38.924	47.868	58.164
3336	19	2011-03-07	1.92838e+06	5.60387e+06	37	8.7	17.8	2	129	19.5	19	0	0	21	0.08	0.13	0	6.2	0	7.7	0.3	343	-7.6	-48	14.2	9.2	12.5	18.2	22.6	26.7	30.7	38.1	45.4	53.4	8.882	12.344	17.881	18.627	22.707	31.516	38.995	47.718	58.144
3336	19	2011-06-07	1.92838e+06	5.60387e+06	33	7.7	17	1.8	128	19.1	17.6	0	0	20	0.08	0.13	0	5.4	0	7.9	1.9	344	-7.6	-48	14.1	7	9.8	15.6	21	26.1	30.6	36.5	44.4	52.2	5.266	6.708	12.913	18.762	23	31.443	40.116	52.024	63.13
3336	19	2011-09-27	1.92838e+06	5.60387e+06	39	9.8	18.4	2	129	20	21	0	0	21	0.08	0.13	0	5.3	0	7.7	0.2	340	-7.6	-48	13.9	9.9	12.9	18.2	22.7	28	31.8	38	46.2	54.3	8.74	12.337	17.881	18.623	22.707	31.518	38.995	47.728	58.144
3336	19	2011-12-06	1.92838e+06	5.60387e+06	37	7.8	18	2.1	129	19.4	21	0	0	21	0.08	0.13	0	6.2	0	7.7	0.1	343	-7.6	-48	14.3	12.7	21	18.8	22.4	26.4	29.1	36.4	42.9	50.3	11.833	12.349	17.881	18.626	22.707	31.417	38.995	47.821	58.164
3336	19	2012-03-06	1.92838e+06	5.60387e+06	36	7.1	15.7	1.9	130	20	15.7	0	0	20	0.08	0.13	0	5.4	0	7.7	0.2	336	-7.6	-48	14.2	9.3	14.1	18	22.5	26	30	37.8	45.7	53.1	8.941	12.344	17.881	18.681	22.707	31.516	38.909	47.713	58.144
3336	19	2012-06-19	1.92838e+06	5.60387e+06	40	8.7	19.4	2.2	130	19.5	17.5	0	0	20	0.08	0.13	0	5.9	0	7.7	0.1	343	-7.6	-48	14	12.6	19.5	19.7	25.2	28.2	32	36.3	44.1	51.8	13.675	19.027	25.418	32.214	39.144	54.602	64.866	79.564	88.014
3336	19	2012-09-24	1.92838e+06	5.60387e+06	38	8	17.3	2	130	20	17.5	0	0	21	0.08	0.13	0	5.8	0	7.7	0.3	331	-7.6	-48	14.1	8.1	10.1	17.8	21.4	26.6	30.3	36.6	44.9	52.6	8.88	12.344	17.881	18.688	22.707	31.516	38.909	47.717	58.144
3336	19	2012-12-11	1.92838e+06	5.60387e+06	38	8.3	18.4	2.2	130	21	18.8	0	0	21	0.08	0.13	0	5.1	0	7.7	0.2	347	-7.6	-48	14.4	9.7	13.6	18.5	21.8	26.4	28.6	36.1	43	50.3	8.382	10.545	17.881	18.608	22.707	31.519	38.995	47.978	58.331
3336	19	2013-08-22	1.92838e+06	5.60387e+06	38	8.3	18.2	2.2	130	18.9	18.5	0	0	21	0.08	0.13	0	5.2	0	7.6	0.3	343	-7.6	-48	14.2	9.6	13.9	18.1	22.3	26.7	30	37.4	44.7	52.1	8.194	10.561	17.881	18.609	22.707	31.413	38.995	47.718	58.144
3336	19	2013-12-09	1.92838e+06	5.60387e+06	35	7.1	19	2.2	132	19.2	17.8	0	0	22	0.08	0.13	0	5.4	0	7.7	0.3	339	-7.6	-48	14	8.1	10.4	18.4	21.7	26.4	30.6	37.5	45	52.6	8.057	10.564	17.881	18.605	22.707	31.413	38.995	47.719	58.144
3336	19	2014-03-10	1.92838e+06	5.60387e+06	37	7.6	19.3	2.4	130	19.3	17.7	0	0	21	0.08	0.13	0	5.2	0	7.8	0.3	339	-7.6	-48	14.3	8.1	10.8	17.3	21.4	26	29.4	36.8	45.3	53.1	11.236	12.348	17.881	18.65	22.707	31.407	39.01	47.832	58.164
3336	19	2014-09-10	1.92838e+06	5.60387e+06	38	8.7	21	2.1	130	18.6	17.1	0	0	21	0.08	0.13	0	6.2	0	7.7	0.2	344	-7.6	-48	14.1	12.4	20.6	19	22.9	27.5	30.8	36.8	44.3	52	11.237	12.348	17.881	18.688	22.707	31.413	38.909	47.713	58.144
3336	19	2015-03-06	1.92838e+06	5.60387e+06	38	8.4	20	2.2	131	18.1	17.6	0	0	21	0.08	0.13	0	5.3	0	7.6	0.2	334	-7.6	-48	14.3	9.5	13.7	18.4	22.5	26.7	29.5	36	43.6	50.7	11.238	12.349	17.881	18.692	22.707	31.415	38.483	47.828	58.164
3336	19	2015-06-16	1.92838e+06	5.60387e+06	39	7.9	19.3	2.4	130	18.8	19.1	0	0	22	0.08	0.13	0	5	0	7.5	0.3	347	-7.6	-48	14.2	8.2	10.9	17.2	21	26.3	30.1	37.7	45.1	52.9	8.212	10.565	17.871	18.609	22.707	31.403	38.995	47.728	58.144
3336	19	2015-09-08	1.92838e+06	5.60387e+06	37	8.2	18.7	2.1	130	18.4	17.6	0	0	21	0.08	0.13	0	5.1	0	7.8	0.3	338	-7.6	-48	14.1	8.2	10.5	18.1	20.9	26.8	30.4	36.9	44.6	52.2	11.209	12.348	17.881	18.687	22.707	31.413	38.924	47.717	58.144
3336	19	2015-12-02	1.92838e+06	5.60387e+06	37	8.3	17.8	2.2	130	17.8	17.3	0	0	21	0.08	0.13	0	5.2	0	7.7	0.2	339	-7.6	-48	14.2	12.6	21.1	18.9	22.9	26.6	29.8	36.2	43.7	50.8	11.212	12.349	17.881	18.69	22.707	29.969	36.263	46.242	52.802
3336	19	2016-03-08	1.92838e+06	5.60387e+06	35	7.3	18.4	2.2	130	18.3	17.4	0	0	22	0.08	0.13	0	5.2	0	7.8	0.2	341	-7.6	-48	14.3	9.6	13.5	18.5	21.7	26.5	29	36.1	42.9	50.4	11.191	12.487	17.881	18.69	22.707	31.415	38.733	47.828	58.164
3336	19	2016-09-26	1.92838e+06	5.60387e+06	36	8.4	20	2.1	129	18.2	17.1	0	0	22	0.08	0.13	0	5.3	0	7.8	0.2	338	-7.6	-48	14.1	10.2	15.6	18.3	22.3	27.7	30.7	36.7	44	51.6	11.216	12.487	17.881	18.687	22.707	31.413	38.733	47.713	58.144
3336	19	2016-12-06	1.92838e+06	5.60387e+06	36	8.5	18.1	2	129	18.9	17.2	0	0	21	0.08	0.13	0	5.1	0	7.7	0.2	338	-7.6	-48	14.2	9.6	13.2	18.8	22.2	26.9	30.2	37.1	44.4	52.2	8.751	12.348	17.881	18.69	22.707	31.413	38.909	47.713	58.144
3336	19	2017-03-07	1.92838e+06	5.60387e+06	37	7.3	17.3	2.3	129	17.4	15.7	0	0.1	23	0.08	0.13	0.1	4.9	0.1	7.7	0.1	334	-7.6	-48	14.3	36.7	39	41.3	38.7	43.7	47.3	49.6	53.3	58.6	26.97	32.193	32.735	34.597	41.731	54.393	64.606	79.503	88.057
3336	19	2017-06-28	1.92838e+06	5.60387e+06	37	8.6	18.7	2.2	132	17.9	17.2	0	0	21	0.08	0.13	0	5.2	0	7.8	0.1	336	-7.6	-48	14	12.6	19.1	19.4	23.5	28	32.3	36.8	44.1	52	13.508	18.563	28.054	32.193	38.7	54.601	65.59	79.564	88.014
3336	19	2017-12-05	1.92838e+06	5.60387e+06	38	8.3	19.8	2.2	129	19.2	16.9	0	0	23	0.08	0.13	0	5.4	0	7.7	0.1	341	-7.6	-48	14.4	12.5	17.4	19.9	22.5	26.2	29.5	36.1	43.4	50.7	14.448	19.022	28.054	32.2	38.611	54.424	65.59	79.564	88.05
3336	19	2018-03-06	1.92838e+06	5.60387e+06	37	8	18.3	2.1	130	18.6	16.7	0	0	22	0.08	0.13	0	5.1	0	7.7	0.1	339	-7.6	-48	14.4	9.7	13.6	18.6	21.9	26	29.1	36.5	43.1	50.5	14.81	19.022	28.054	32.197	38.611	54.491	65.59	79.564	88.05
3336	19	2018-06-13	1.92838e+06	5.60387e+06	37	7.9	18.9	2.2	131	18.9	16.6	0	0	23	0.08	0.13	0	5.1	0	7.7	0.1	335	-7.6	-48	14.2	10.3	16	18.6	22.1	26.7	30.3	36.5	43.4	51.1	14.448	19.033	28.054	32.198	38.611	54.422	65.59	79.564	88.05
3336	19	2018-12-04	1.92838e+06	5.60387e+06	38	8.3	18.5	2.2	129	19.4	16.3	0	0	22	0.08	0.13	0	5.4	0	7.7	0.1	344	-7.6	-48	14.5	9.8	13.6	18.6	21.9	25	29	35.7	41.8	49.4	14.425	19.022	28.054	32.195	38.611	54.491	65.59	79.564	88.05
3336	19	2019-03-05	1.92838e+06	5.60387e+06	36	8	18.9	2.2	129	19.4	16.3	0	0	22	0.08	0.13	0	5.2	0	7.8	0.1	345	-7.6	-48	14.3	9.9	15.2	18.7	22.2	26.1	29	35.7	42.4	49.9	14.811	18.565	28.054	32.197	38.709	54.491	65.59	79.564	88.05
3336	19	2019-06-04	1.92838e+06	5.60387e+06	39	8.5	19.6	2.2	131	19.5	16.8	0	0	21	0.08	0.13	0	5.3	0	7.9	0.2	344	-7.6	-48	14.1	11.2	18.1	19	22.6	27.2	30.7	36.2	43.6	51.5	11.308	12.345	17.881	18.76	22.707	31.516	38.924	47.753	58.144
3336	19	2019-09-17	1.92838e+06	5.60387e+06	39	8.4	18.4	2.2	129	20	16.1	0	0	21	0.08	0.13	0	5.2	0	7.7	0.1	345	-7.6	-48	14.2	9.4	13.3	18.5	22.5	26.2	30.7	35.6	43	50.8	14.985	19.027	28.054	32.198	38.472	54.602	65.59	79.564	88.05
3336	19	2019-12-18	1.92838e+06	5.60387e+06	40	8.7	20	2.3	127	21	16.7	0	0	23	0.08	0.13	0	5.5	0	7.7	-0.3	332	-7.6	-48	14.1	8	9.3	16.6	22.1	25.4	29.9	36.4	44.5	51.6	14.598	19.03	28.054	32.154	38.63	54.422	65.59	79.564	88.04
3336	19	2020-03-18	1.92838e+06	5.60387e+06	39	8.4	17.6	2.2	127	17.5	15	0	0	22	0.08	0.13	0	5.7	0	7.6	-0.2	338	-7.6	-48	14.2	8	9.2	16.6	21.5	25.6	29.2	36.9	44.5	51.6	14.819	19.034	28.054	32.155	38.63	54.488	65.59	79.564	88.05
3336	19	2020-06-22	1.92838e+06	5.60387e+06	40	8.9	19.3	2.4	128	20	16.6	0	0	22	0.08	0.13	0	5.6	0	7.8	-0.1	341	-7.6	-48	14.1	7.2	8.9	16.2	20.8	26.4	30.4	35.9	43.6	50.8	14.947	18.562	28.054	32.153	38.728	54.488	65.59	79.564	88.04
3781	79	2011-12-08	1.93202e+06	5.61807e+06	23	2.3	15.3	2	94	9.5	8	0	0.1	22	0.08	0.13	0.2	0	0.2	8	0.3	194	-7.6	-48	15.2	32.8	33.5	34.1	37.8	46	51.2	62.9	70.3	79.1	17.744	21.028	27.929	36.493	44.625	54.611	64.532	79.353	88.1
3781	79	2012-03-08	1.93202e+06	5.61807e+06	24	2.2	14	1.9	94	10.5	7.3	0	0.1	22	0.08	0.13	0.2	0	0.2	8	0.3	196	-7.6	-48	14.9	32.2	32.8	32.9	37	46.5	54.3	66.2	75.2	83.6	17.456	21.014	27.849	36.381	43.945	54.611	64.532	79.532	88.062
3781	79	2012-09-26	1.93202e+06	5.61807e+06	23	2.1	13.8	1.8	94	9.7	10.7	0	0	22	0.08	0.13	0.2	0	0.2	8	0.2	196	-7.6	-48	15.1	33.7	34.9	34.6	36	43.7	49	59.9	67.1	75.9	19.13	20.64	28.933	36.362	44.751	54.626	64.461	79.249	88.081
3781	79	2012-12-10	1.93202e+06	5.61807e+06	23	2.1	13.5	1.9	94	10.7	7.4	0	0.1	22	0.08	0.13	0.1	0	0.2	8	0.1	199	-7.6	-48	15.1	41.8	42.4	40.5	41.5	43.5	49.4	58.8	64.8	73	25.743	30.823	31.174	35.39	44.103	54.608	64.532	79.343	88.085
3781	79	2013-08-16	1.93202e+06	5.61807e+06	23	2.1	16.5	2.1	96	9.5	6.8	0	0	22	0.08	0.13	0.2	0	0.2	7.9	0.5	203	-7.6	-48	14.9	24.2	26.6	30.4	37.6	46.3	53.3	63.4	72	79.6	19.367	20.048	28.753	36.32	44.484	54.807	65.039	79.266	88.085
3781	79	2013-12-12	1.93202e+06	5.61807e+06	23	2.1	12.7	1.8	109	9.6	7.1	0	0	23	0.08	0.13	0.2	0	0.2	8	0.3	200	-7.6	-48	14.9	29.9	31.5	32.9	36	44.7	52.4	64.4	73.4	81.7	19.081	20.258	28.933	36.32	44.372	54.56	64.39	79.266	88.05
3781	79	2014-03-12	1.93202e+06	5.61807e+06	23	2.1	14.9	2	97	10.1	7	0	0	23	0.08	0.13	0.2	0	0.2	7.9	0.2	199	-7.6	-48	15.2	35.4	36.8	38	37.1	46	51	62.4	69.7	78.3	19.462	20.641	28.933	36.365	44.82	54.56	64.461	79.249	88.087
3781	79	2014-09-09	1.93202e+06	5.61807e+06	24	2.2	14.8	1.8	97	9.3	6	0	0.1	23	0.08	0.13	0.2	0.1	0.2	8	0.2	204	-7.6	-48	15	34.5	36.1	34.5	37.7	45.8	51.3	63.9	73.2	81.9	17.383	20.64	27.873	35.766	43.57	54.553	64.532	79.543	87.974
3781	79	2015-03-05	1.93202e+06	5.61807e+06	23	2.2	15.6	2	98	9.2	5.8	0	0.1	22	0.08	0.13	0.2	0	0.2	8	0.1	199	-7.6	-48	15.1	44.4	45.2	43.6	44	48	52.6	62.6	70	78.2	25.904	30.813	31.89	38.035	44.242	54.601	64.532	78.716	88.036
3781	79	2015-06-18	1.93202e+06	5.61807e+06	25	2.2	14.5	2.1	98	9.3	6.4	0	0.1	22	0.08	0.13	0.2	0.1	0.2	7.6	0.2	201	-7.6	-48	14.9	35.6	36.5	37.2	38.7	46.5	51.8	63.6	72	80.5	17.892	21.105	27.849	35.766	43.585	54.619	64.532	79.543	88.029
3781	79	2015-09-10	1.93202e+06	5.61807e+06	25	2.3	14.8	2	97	9.4	6.6	0	0.1	23	0.08	0.13	0.2	0	0.2	7.9	0.3	200	-7.6	-48	14.9	31.7	32.9	33.5	36.1	46	52.9	65.6	74.1	82.7	17.828	20.645	27.895	36.384	44.291	54.544	64.532	79.366	88.09
3781	79	2015-12-02	1.93202e+06	5.61807e+06	23	2.3	13.2	1.8	97	9.1	6.4	0	0.1	22	0.08	0.13	0.2	0	0.1	8	0.2	198	-7.6	-48	15	33.3	34.5	35.3	36.3	44.1	49.4	61.4	69.5	77.9	17.542	21.031	27.871	36.381	44.307	54.611	64.532	79.341	88.084
3781	79	2016-03-10	1.93202e+06	5.61807e+06	24	2.3	13.6	2	97	9.6	6.1	0	0.1	24	0.08	0.13	0.2	0	0.2	8	0.1	202	-7.6	-48	15.1	44	45.4	44.6	43.6	46.9	53.2	64.8	72.7	82.7	25.88	30.828	31.89	38.051	44.618	54.535	64.532	78.737	88.106
3781	79	2016-06-09	1.93202e+06	5.61807e+06	24	2.3	14.2	1.9	99	9.3	6.3	0	0.1	23	0.08	0.13	0.2	0	0.2	8	0.3	203	-7.6	-48	15	32.3	32.8	33	35.9	45.7	51.9	64.2	72.7	81.6	17.384	20.645	27.895	36.387	44.361	54.544	64.532	79.366	88.084
3781	79	2016-09-28	1.93202e+06	5.61807e+06	23	2.1	15.2	1.8	101	9.4	6.1	0	0.1	23	0.08	0.13	0.2	0.1	0.2	7.9	0.1	200	-7.6	-48	15	40.7	42.7	43.4	41.8	47.9	53.6	64.3	72.6	80.3	25.704	30.824	31.89	38.03	43.607	54.544	64.532	78.915	88.035
3781	79	2016-12-08	1.93202e+06	5.61807e+06	23	2.1	12.8	1.8	102	9.4	5.9	0	0.1	23	0.08	0.13	0.2	0	0.2	7.9	0.1	202	-7.6	-48	15	41	41.7	40.7	41.1	45.4	51.7	61.9	68.9	77	25.69	30.814	31.89	38.03	44.075	54.536	64.461	78.734	88.027
3781	79	2017-03-08	1.93202e+06	5.61807e+06	23	2.1	13.3	1.9	99	9.5	5	0	0.1	23	0.08	0.13	0.2	0	0.2	7.9	0	202	-7.6	-48	15	50.1	49.7	46.6	46.7	48.4	54.3	63.6	70.7	79.2	26.12	30.811	31.89	38.022	44.095	54.536	64.532	78.734	88.027
3781	79	2017-09-06	1.93202e+06	5.61807e+06	24	2.2	13.7	1.9	98	9.7	6.2	0	0.1	25	0.08	0.13	0.2	0	0.2	7.9	0.1	201	-7.6	-48	15.1	43.4	44.4	42	42.4	46.3	52.2	63.1	70.9	80.4	25.713	30.814	31.89	38.054	44.281	54.535	64.532	78.737	88.091
3781	79	2017-12-06	1.93202e+06	5.61807e+06	24	2.3	13.7	1.9	96	9.6	5.5	0	0.1	25	0.08	0.13	0.2	0	0.2	7.9	0.2	205	-7.6	-48	15.2	38.7	40.9	40.1	40.6	47.4	51.9	62.8	70.8	79	17.4	20.645	27.895	36.431	44.748	54.544	64.532	79.364	88.057
3781	79	2018-03-07	1.93202e+06	5.61807e+06	23	2.2	13.9	1.9	96	9.6	6.6	0	0.1	26	0.08	0.13	0.2	0	0.2	8	0.2	200	-7.6	-48	15.1	35.7	36.5	37.9	37.7	45.9	52.4	65.5	74.5	83.8	17.4	20.631	27.873	36.43	44.287	54.544	64.532	79.364	88.078
3781	79	2018-06-14	1.93202e+06	5.61807e+06	24	2.1	14.5	1.9	94	9.9	7.4	0	0.1	24	0.08	0.13	0.2	0.3	0.2	7.9	0.2	200	-7.6	-48	14.9	33.4	34.7	36.3	39.1	46.9	52.3	64	72.4	80.5	17.398	20.639	27.873	35.795	43.667	54.553	64.532	79.543	88.029
3781	79	2018-09-05	1.93202e+06	5.61807e+06	23	2.1	14.4	1.9	93	9.9	6.9	0	0	23	0.08	0.13	0.2	0	0.2	8	0.2	200	-7.6	-48	14.8	36.9	38.2	39.2	38.8	47.5	53.4	65.2	72.9	81.5	19.112	20.257	28.933	36.319	44.372	54.661	64.382	79.262	88.065
3781	79	2018-12-05	1.93202e+06	5.61807e+06	24	2.2	13.6	2	94	9.5	7.2	0	0.1	24	0.08	0.13	0.2	0.3	0.2	8	0.2	201	-7.6	-48	15.1	33.8	36.1	37.2	38.8	45.7	50.6	62.1	71.1	79	17.664	20.639	27.873	35.814	43.888	54.553	64.532	79.546	88.038
3781	79	2019-03-06	1.93202e+06	5.61807e+06	23	2	14.3	1.9	93	9.3	7.2	0	0	24	0.08	0.13	0.2	0	0.2	8	0.1	198	-7.6	-48	15.2	43.4	44.4	41.6	42.2	45.4	50.7	60.3	68.2	75.4	27.097	31.91	34.717	37.805	44.697	54.485	64.29	78.425	88.062
3781	79	2019-06-05	1.93202e+06	5.61807e+06	24	2	13	1.8	94	9.3	7.2	0	0	23	0.08	0.13	0.2	0	0.2	8.1	0.2	199	-7.6	-48	15	33.2	34.1	34.7	37.6	46	51	62.2	70.6	79.2	19.046	20.647	28.933	36.354	44.417	54.56	64.39	79.247	88.037
3781	79	2019-09-18	1.93202e+06	5.61807e+06	23	2	13.8	1.9	90	9.7	7.4	0	0	23	0.08	0.13	0.2	0	0.2	8.1	0.2	193	-7.6	-48	14.9	36.5	37.6	37.8	39.6	46.3	52.2	62.8	70.2	79.1	19.093	20.638	28.991	36.424	44.364	54.56	64.461	79.247	88.037
3781	79	2020-03-19	1.93202e+06	5.61807e+06	24	2.2	13.3	1.9	94	9.1	7.9	0	0	24	0.08	0.13	0.2	0	0.2	8	-0.2	193	-7.6	-48	14.9	17.3	20.7	29.3	35	43.5	46.6	58.1	72.4	75.7	27.607	31.912	34.733	37.722	44.192	54.487	64.29	78.418	88.069
3781	79	2020-06-23	1.93202e+06	5.61807e+06	23	2.2	13.8	1.9	95	9.2	7.4	0	0	24	0.08	0.13	0.2	0	0.2	7.9	-0.2	196	-7.6	-48	14.9	23.7	27	31.2	35.5	43.7	46.8	60.9	71.3	76.8	27.5	31.912	34.717	37.726	44.183	54.487	64.29	78.418	88.075
8521	26	2010-12-08	1.9231e+06	5.60595e+06	31	4.4	19.6	1.7	99	21	13.5	0	0	22	0.08	0.13	0	2.4	0	7.5	4.3	283	-7.6	-48	15.3	3	4	5.7	8.8	10.8	10.8	12.6	16.4	20.2	3.599	3.51	4.954	28.104	41.853	54.801	67.196	79.63	87.943
8521	26	2011-03-08	1.9231e+06	5.60595e+06	29	4.6	17.8	1.7	105	22	14.3	0	0	18.6	0.08	0.13	0	2.4	0	7.3	4.3	284	-7.6	-48	15.2	2.1	3	4	6.5	6.9	5.2	5.2	4.7	5.2	3.427	3.451	4.904	28.127	42.346	54.79	66.472	79.266	87.943
8521	26	2011-06-08	1.9231e+06	5.60595e+06	29	5	17.2	1.5	104	21	14.3	0	0	19.7	0.08	0.13	0	2.4	0	7.4	4	284	-7.6	-48	15.1	2.6	3.3	4.1	7.2	8.9	9.3	11.6	15.5	19.2	3.745	3.505	4.954	28.106	42.346	54.914	66.472	79.073	87.927
8521	26	2011-09-28	1.9231e+06	5.60595e+06	31	4.7	21	1.8	105	22	12.4	0.1	0	20	0.08	0.13	0	2.1	0	7.2	3.7	280	-7.6	-48	15.1	3.2	4.3	4.9	8.7	11.9	8.5	10.2	14.9	15.8	1.604	2.222	3.208	4.388	14.986	29.975	38.637	50.721	60.405
8521	26	2011-12-07	1.9231e+06	5.60595e+06	28	4.5	19.2	1.7	113	24	6.3	1	0.1	5.6	0.08	0.13	0	0	0.2	7.9	0.2	264	-7.6	-48	15.2	8.1	9	10.6	23.7	26.5	25.3	26.2	33.8	40.6	17.242	19.14	23.419	27.584	33	37.691	49.829	58.888	66.976
8521	26	2012-03-07	1.9231e+06	5.60595e+06	30	4.5	18	1.6	106	24	13.4	0.1	0	19	0.08	0.13	0	2.5	0	7.6	4.3	278	-7.6	-48	15.2	2.6	3.5	4.5	7.8	9	7.3	7.2	8.1	8.3	3.86	3.922	5.423	26.585	34.864	38.065	51.775	69.193	78.066
8521	26	2012-09-25	1.9231e+06	5.60595e+06	31	4.7	21	2	107	22	13.5	0.1	0	19.7	0.08	0.13	0	2.4	0	7.3	3.8	281	-7.6	-48	15.2	2.9	3.9	4.2	6.2	9	6.5	5.8	7	6.4	3.425	3.957	5.412	26.735	35.312	39.543	51.775	68.882	78.066
8521	26	2012-12-12	1.9231e+06	5.60595e+06	30	4.6	18.7	1.8	108	25	14.4	0	0	21	0.08	0.13	0	2.8	0	7.2	4.2	294	-7.6	-48	15.2	2.9	3.8	6.3	6.9	9.3	8.7	9.7	12.7	15.3	3.157	3.06	4.852	7.263	18.349	31.137	40.354	53.89	64.929
8521	26	2013-08-15	1.9231e+06	5.60595e+06	33	5.1	21	1.8	112	23	14.2	0	0	21	0.08	0.13	0	2.7	0	7.4	4	311	-7.6	-48	15.3	3.1	4.1	6.2	9.6	10.7	10.7	11.7	14.9	18.5	3.6	3.499	4.904	28.306	41.751	54.913	67.196	79.68	87.943
8521	26	2013-12-10	1.9231e+06	5.60595e+06	33	4.8	20	1.9	112	21	14.5	0	0	21	0.08	0.13	0	2.6	0	7.2	3.7	294	-7.6	-48	15.1	2.8	3.6	4.8	6.8	8.5	10	9.2	12	15.7	3.167	3.061	4.852	7.266	18.349	31.137	40.599	53.89	64.929
8521	26	2014-03-13	1.9231e+06	5.60595e+06	33	5	21	1.8	113	23	14.5	0	0	21	0.08	0.13	0	2.6	0	7.4	4	297	-7.6	-48	15.8	2.5	3.3	4.8	5.3	7.1	4.4	6.1	8	8.1	3.603	3.487	4.904	28.305	41.751	54.876	67.196	79.679	87.943
8521	26	2014-06-23	1.9231e+06	5.60595e+06	32	4.6	19.9	1.9	114	22	15	0	0	21	0.08	0.13	0	2.5	0	7.4	4	302	-7.6	-48	15.2	3	4.1	5.4	7.7	11	9.7	11	14.4	17.6	3.822	3.499	4.904	28.307	41.751	54.914	67.196	79.803	87.943
8521	26	2014-09-12	1.9231e+06	5.60595e+06	32	4.7	21	1.9	115	22	14.7	0	0	22	0.08	0.13	0	2.2	0	7.4	3.8	298	-7.6	-48	14.7	3	4	5.2	11	15.4	15.7	16	22.1	25.8	3.762	3.561	4.074	4.398	15.4	30.777	40.377	53.901	64.676
8521	26	2014-12-04	1.9231e+06	5.60595e+06	33	4.9	21	2	116	22	15.1	0	0	21	0.08	0.13	0	2	0	7.5	3.7	301	-7.6	-48	15.3	2.4	3.1	3.9	6.7	10.2	8.9	8.9	13.2	15	1.628	2.088	3.208	4.331	9.553	9.094	11.948	14.718	18.9
8521	26	2015-03-05	1.9231e+06	5.60595e+06	34	5.2	21	1.8	118	23	14.1	0	0	20	0.08	0.13	0	2.4	0	7.3	4	304	-7.6	-48	15.3	2.5	3.3	4.9	8.3	10	8.1	10.5	14.5	15.6	3.254	3.059	4.852	7.266	18.349	31.142	40.599	53.885	64.929
8521	26	2015-06-18	1.9231e+06	5.60595e+06	36	5.1	22	2.2	119	23	14.1	0	0	21	0.08	0.13	0	2.7	0	7.2	5.3	312	-7.6	-48	15.1	3.3	4.4	5.6	10.2	10.7	11.8	11	14.5	18.4	5.468	10.805	17.65	19.365	22.772	30.85	37.894	46.123	53.094
8521	26	2015-09-10	1.9231e+06	5.60595e+06	35	5.5	22	2	119	23	14	0	0	21	0.08	0.13	0	2.7	0	7.2	3.7	311	-7.6	-48	15.2	2.9	3.8	5.4	8.3	9.4	9.8	11.3	15.8	19.4	3.004	3.06	4.852	7.733	13.453	29.993	39.07	49.812	60.405
8521	26	2015-12-02	1.9231e+06	5.60595e+06	35	5.5	21	1.9	120	23	14.2	0	0	21	0.08	0.13	0	2.8	0	7.1	3.8	314	-7.6	-48	15.3	2.8	3.5	5.7	7.4	7.4	8.9	10.8	15.6	18.3	2.969	3.012	4.852	7.774	18.085	31.142	40.599	53.874	64.906
8521	26	2016-03-10	1.9231e+06	5.60595e+06	37	5.2	19.7	1.9	123	24	14.8	0	0	22	0.08	0.13	0	2.8	0	7.4	4.3	323	-7.6	-48	15.4	2.5	3.4	5.8	7	8.2	8.2	8.6	11.7	13.3	3.563	3.506	4.954	28.102	41.853	54.801	67.196	79.691	87.943
8521	26	2016-06-09	1.9231e+06	5.60595e+06	35	5.5	21	1.9	125	22	14.6	0	0	22	0.08	0.13	0	2.5	0	7.4	4	319	-7.6	-48	14.8	2.8	3.7	5.6	10.5	14.1	15.1	18.7	25.1	30	3.684	3.557	4.954	28.101	41.177	54.903	67.196	79.667	87.943
8521	26	2016-09-28	1.9231e+06	5.60595e+06	32	5.1	21	1.8	125	23	14.6	0	0	21	0.08	0.13	0	3	0	7.3	3.9	313	-7.6	-48	15.2	3.1	4.1	6.1	8.1	10	11.1	11.7	15.1	19.4	3.181	3.057	4.852	7.27	18.349	31.137	40.354	53.888	64.929
8521	26	2016-12-08	1.9231e+06	5.60595e+06	34	5.3	19	1.8	129	23	14.5	0	0	21	0.08	0.13	0	2.2	0	7.4	3.9	316	-7.6	-48	15.3	2.9	3.6	5.5	7.9	10.3	11.3	15.6	20.5	25.8	2.864	3.009	3.938	4.818	15.052	31.364	40.637	53.879	64.897
8521	26	2017-03-08	1.9231e+06	5.60595e+06	32	4.9	18.8	1.8	122	20	13.7	0	0	22	0.08	0.13	0	1.9	0	7.2	3.9	301	-7.6	-48	15.5	2.1	2.8	3.5	4.8	6.2	6.4	7.7	11.7	15.6	0.945	1.194	1.975	2.909	15.509	31.139	40.271	53.937	64.897
8521	26	2017-06-29	1.9231e+06	5.60595e+06	35	5.3	21	2	126	22	14	0.1	0	21	0.08	0.13	0	2	0	7.3	3.6	312	-7.6	-48	14.9	2.7	3.6	3.9	9.9	14.1	10.7	12.2	18.9	23.2	1.14	1.374	1.975	2.975	9.453	8.338	12.121	14.532	18.463
8521	26	2017-09-06	1.9231e+06	5.60595e+06	35	5.4	19.9	1.9	125	24	14.3	0.1	0	23	0.08	0.13	0	2	0	7.2	3.6	314	-7.6	-48	15.3	2.3	3	3.3	4.9	8.9	7.5	8.3	12.8	15.8	0.622	0.968	1.684	2.784	14.986	29.764	39.042	50.521	60.35
8521	26	2017-12-06	1.9231e+06	5.60595e+06	36	5.8	20	2	123	23	13.2	0.1	0	22	0.08	0.13	0	1.9	0	7	3.6	322	-7.6	-48	15.6	2	2.8	2.7	4.7	6.3	3.6	4.1	8.4	7.9	1.197	1.304	1.975	2.968	9.205	8.33	12.19	14.476	18.609
8521	26	2018-03-06	1.9231e+06	5.60595e+06	34	5.2	21	1.9	125	23	13.8	0.1	0	22	0.08	0.13	0	1.9	0	7.4	4.6	315	-7.6	-48	16.5	1.4	2	0.3	2.4	0.9	0.1	1.2	0.1	1.4	1.772	2.196	3.208	4.329	14.666	29.989	39.042	50.55	60.405
8521	26	2018-06-13	1.9231e+06	5.60595e+06	35	5.3	22	2	124	24	14.4	0.1	0	23	0.08	0.13	0	1.7	0	7.1	3.6	317	-7.6	-48	15.1	2.2	3.2	3.3	7.1	11.4	7.5	8.2	13.4	14	0.703	0.969	1.684	2.785	6.055	7.585	10.142	11.936	17.17
8521	26	2018-09-04	1.9231e+06	5.60595e+06	35	5.1	21	1.9	122	24	14	0	0	21	0.08	0.13	0	1.7	0	7.2	3.7	315	-7.6	-48	15	2.6	3.4	4.7	9.3	11.9	13.2	17.5	23	28.5	1.049	1.191	1.975	2.91	12.475	31.14	40.852	53.95	64.897
8521	26	2018-12-04	1.9231e+06	5.60595e+06	37	5.8	21	1.9	121	25	12.8	0	0	22	0.08	0.13	0	1.8	0	7.3	3.7	318	-7.6	-48	15.8	2.3	2.9	3.3	4.5	5.8	4.5	7.6	11.7	13.7	1.037	1.18	1.975	2.91	12.52	31.144	40.852	54.075	64.897
8521	26	2019-03-05	1.9231e+06	5.60595e+06	35	5.2	22	1.9	121	25	13	0	0	22	0.08	0.13	0	2.3	0	7.4	4	323	-7.6	-48	15.5	2	2.6	3.6	4.8	6.1	4.9	4.3	4.5	4.9	3.573	3.504	4.954	28.103	41.853	54.801	67.196	79.685	87.943
8521	26	2019-06-04	1.9231e+06	5.60595e+06	38	5.8	22	2	124	25	13.6	0	0	21	0.08	0.13	0	2.6	0	7.3	4	329	-7.6	-48	15.2	2.8	3.7	4.5	6.8	8.6	7.6	8.3	12	13.9	3.031	3.062	4.852	7.738	13.453	29.993	39.07	49.812	60.405
8521	26	2019-09-17	1.9231e+06	5.60595e+06	36	5.6	21	1.9	122	25	13.2	0	0	21	0.08	0.13	0	2.9	0	7.5	4.1	317	-7.6	-48	15.2	2.6	3.4	6.1	10.1	10.2	10.2	11.9	16.8	20	3.822	3.505	4.954	28.104	41.751	54.914	67.196	79.804	87.943
8521	26	2019-12-18	1.9231e+06	5.60595e+06	38	5.8	23	2	122	26	13.3	0	0	23	0.08	0.13	0	3.2	0	7.2	3.7	327	-7.6	-48	15	3.6	5.3	6	9	11.4	12.4	15.1	20.3	25	2.692	2.636	4.149	4.816	9.685	9.107	11.98	14.585	18.578
8521	26	2020-03-18	1.9231e+06	5.60595e+06	37	5.5	20	2	124	22	12.7	0.1	0	23	0.08	0.13	0	3	0	7.1	3.6	323	-7.6	-48	15.6	2.9	3.9	4.3	6.7	6.5	4.7	5.9	8.7	10	2.628	2.839	4.852	8.389	13.606	28.613	39.148	50.65	60.328
8521	26	2020-06-22	1.9231e+06	5.60595e+06	37	5.8	21	2	126	24	13.7	0	0	22	0.08	0.13	0	3.1	0	7.3	3.7	331	-7.6	-48	15.1	3	3.7	5.9	9	9.7	11.6	11.9	16	20.2	3.08	3.067	4.852	7.737	13.453	29.993	39.07	49.831	60.405
10340	27	2011-03-08	1.92296e+06	5.6094e+06	16.1	2.4	8.7	1.4	69	7.5	9.9	0	0	16.2	0.08	0.13	0	0.8	0	7.4	4	164	-7.6	-48	16	0.6	0.3	0.1	1.5	0.6	2	0.8	2.2	23.4	1.059	1.1	1.768	2.225	4.181	4.611	6.438	31.736	33.879
10340	27	2011-06-08	1.92296e+06	5.6094e+06	19.9	3	8.8	1.3	73	8.7	10.1	0.1	0	16.1	0.08	0.13	0	0.6	0	7.1	3.4	173	-7.6	-48	14	1.9	1.8	2.3	11.8	12.9	7.3	8.3	12.3	13.2	1.018	1.448	2.491	7.222	12.12	27.314	25.865	36.133	43.665
10340	27	2011-09-30	1.92296e+06	5.6094e+06	19.3	2.8	9.4	1.5	73	6.9	9.5	0.2	0	17.3	0.08	0.13	0	0.7	0	6.9	3	162	-7.6	-48	15.3	0.8	0.9	0.1	3.5	1.3	0.2	0.1	0.1	0.1	0.644	0.922	2.023	2.492	3.369	4.451	6.45	32.274	33.397
10340	27	2012-03-08	1.92296e+06	5.6094e+06	19	2.5	9.1	1.6	68	7.7	8.8	0.1	0	17.9	0.08	0.13	0	0.7	0	7.2	4.4	153	-7.6	-48	16.5	0.5	0.2	0.1	1.6	0.3	2	1.1	0.1	22.8	0.49	0.871	1.477	1.61	2.521	2.783	13.971	31.548	34.351
10340	27	2012-06-21	1.92296e+06	5.6094e+06	22	3.2	10.3	1.8	72	7.2	11	0	0	16.4	0.08	0.13	0	0.6	0	7.1	2.9	161	-7.6	-48	14.7	1.5	1.6	1.5	5.8	4.5	5.1	5.3	5.9	6.2	0.668	0.947	1.477	1.723	3.138	4.368	6.45	32.284	33.716
10340	27	2012-09-26	1.92296e+06	5.6094e+06	20	2.9	10	1.6	75	9.8	11.6	0	0	18	0.08	0.13	0	0.7	0	7	5	173	-7.6	-48	14.6	1.5	1.4	1.4	5.1	4.1	4.6	5.1	8.9	9	0.819	0.946	1.477	1.761	3.099	4.334	6.386	31.7	33.416
10340	27	2012-12-12	1.92296e+06	5.6094e+06	16.8	2.4	8.8	1.6	67	6.7	10	0	0	17.2	0.08	0.13	0	0.7	0	7.3	4.7	153	-7.6	-48	15.9	0.5	0.2	0.1	1.5	0.6	1.9	0.7	2.3	23.4	0.447	0.786	1.005	0.795	3.073	4.13	14.981	32.007	34.353
10340	27	2013-08-16	1.92296e+06	5.6094e+06	23	3.1	11.6	1.9	80	10.9	11.5	0	0	16.9	0.08	0.13	0	0.8	0	7	4.2	196	-7.6	-48	13.7	2.8	2.7	3.2	11.7	14.6	23.8	22.1	24	31.2	1.892	2.221	4.054	8.925	11.038	9.037	12.218	18.344	32.827
10340	27	2013-12-10	1.92296e+06	5.6094e+06	19.9	2.7	9.8	1.7	72	6.6	11.3	0	0	18.6	0.08	0.13	0	0.8	0	7	4.1	168	-7.6	-48	16.4	0.6	0.3	0.1	1.5	0.6	2	0.8	2.2	23.4	-0.295	0.079	0.627	0.493	2.516	1.918	13.346	24.736	32.11
10340	27	2014-03-13	1.92296e+06	5.6094e+06	18.3	2.5	9.6	1.6	70	6.3	10.3	0.1	0	18.4	0.08	0.13	0	0.6	0	7.2	3.6	157	-7.6	-48	17.4	0.5	0.3	0.1	1.5	0.8	1.9	0.7	2.3	23.4	-0.015	0.229	0.804	0.532	2.295	1.857	13.392	24.868	32.713
10340	27	2014-06-23	1.92296e+06	5.6094e+06	22	3.2	9.9	1.8	79	9.1	12.2	0.1	0	17.1	0.08	0.13	0	0.8	0	7.3	3.5	189	-7.6	-48	14.8	1.4	1.3	1.1	6.6	3.8	2.5	1.6	2.7	0.6	0.351	0.228	0.533	0.265	3.009	3.541	4.858	4.673	11.306
10340	27	2014-09-12	1.92296e+06	5.6094e+06	19.5	2.8	10.1	1.7	74	7.3	11.2	0	0	18.7	0.08	0.13	0	0.6	0	7.2	3.9	172	-7.6	-48	14.2	1.8	1.8	1.8	6.7	6.1	8.8	12.8	14.3	16.4	0.911	1.322	2.52	7.122	10.779	8.955	12.603	17.984	32.557
10340	27	2014-12-04	1.92296e+06	5.6094e+06	17.7	2.6	9.8	1.7	69	5.7	10.1	0	0	18.5	0.08	0.13	0	0.6	0	7.2	4.5	157	-7.6	-48	16.3	0.5	0.2	0.1	1.5	0.8	1.9	0.7	2.3	23.4	0.023	0.162	0.804	0.446	2.945	1.921	13.392	24.755	32.151
10340	27	2015-03-05	1.92296e+06	5.6094e+06	17.7	2.6	9.3	1.7	71	5.7	8.7	0	0	17.7	0.08	0.13	0	0.5	0	6.8	4.6	155	-7.6	-48	16.7	0.5	0.4	0.1	1.5	0.8	1.9	0.7	2.4	23.4	0.408	0.161	0.804	0.446	2.616	2.066	13.392	25.015	32.151
10340	27	2015-06-19	1.92296e+06	5.6094e+06	21	3	10.1	1.7	76	9.2	10.2	0	0	17.1	0.08	0.13	0	0.6	0	7.3	3.7	180	-7.6	-48	14.8	1.2	1.2	0.8	3.3	1.8	2	1.7	3.3	1.4	0.357	0.133	0.533	0.163	3.1	3.593	4.858	4.685	11.6
10340	27	2015-09-10	1.92296e+06	5.6094e+06	19.8	3.1	9.6	1.6	72	6.7	9.6	0	0	17.3	0.08	0.13	0	0.6	0	7.2	4.6	164	-7.6	-48	14.3	2.1	1.9	1.8	7	5.7	9.9	12.9	15	20.8	1.268	1.616	3.129	9.298	11.683	8.938	12.218	18.359	32.737
10340	27	2015-12-02	1.92296e+06	5.6094e+06	21	3.1	9.9	1.7	73	8.8	9.7	0	0	18.1	0.08	0.13	0	0.8	0	6.8	4.2	104	-7.6	-48	15.5	0.6	0.5	0.1	1.2	0.2	1.7	0.2	0.2	0.6	0.514	0.829	1.477	1.625	3.046	4.327	15.052	31.723	34.136
10340	27	2016-03-10	1.92296e+06	5.6094e+06	18.5	2.8	9	1.6	68	6.7	10	0	0	19.3	0.08	0.13	0	0.4	0	7.2	5.3	159	-7.6	-48	16.3	0.6	0.3	0.1	1.5	0.6	2	0.8	2.2	23.4	0.279	0.12	0.529	0.512	2.739	1.706	2.714	2.671	8.496
10340	27	2016-06-09	1.92296e+06	5.6094e+06	19.8	2.9	9.6	1.9	74	8.1	10	0	0	17	0.08	0.13	0	0.4	0	7.3	4.3	172	-7.6	-48	14.5	1.6	1.8	1.7	6.6	4.6	6.1	7.6	10	10.7	1.42	1.558	2.422	4.262	5.441	8.269	12.063	17.739	32.604
10340	27	2016-09-28	1.92296e+06	5.6094e+06	19.9	3.1	9.3	1.6	76	8.3	10.6	0	0	17.3	0.08	0.13	0	1.8	0	7.2	4.8	175	-7.6	-48	14.2	2.1	2.3	3.2	9.3	5.5	8.9	11.1	16.3	20.5	0.838	0.996	2.424	7.133	11.614	9.029	12.218	18.259	32.617
10340	27	2016-12-08	1.92296e+06	5.6094e+06	16.9	2.5	8.2	1.5	62	6.5	9.6	0	0	18.4	0.08	0.13	0	0.6	0	6.7	5.4	156	-7.6	-48	15.8	1	0.1	0.1	1.3	0.7	0.4	0.1	0.1	9.2	1.15	1.105	1.843	2.346	4.385	4.621	16.506	31.689	34.287
10340	27	2017-06-29	1.92296e+06	5.6094e+06	24	3.5	10.1	1.9	79	10.2	12.4	0	0	17.4	0.08	0.13	0	0.8	0	7	3.5	197	-7.6	-48	14.5	1.8	1.8	2.2	7	2.8	5.3	4.3	4.3	5.9	1.578	1.568	2.43	4.266	5.516	8.293	11.7	17.728	32.883
10340	27	2017-09-06	1.92296e+06	5.6094e+06	22	3.3	9.6	1.7	77	9.7	11.5	0	0	18.9	0.08	0.13	0	0.9	0	7	3.5	186	-7.6	-48	14.9	1.3	1.4	1.4	2.8	1.2	2	1.2	0.9	0.5	0.241	0.186	0.529	0.213	3.331	3.593	4.955	4.822	11.581
10340	27	2017-12-06	1.92296e+06	5.6094e+06	18.3	2.9	8.9	1.7	68	6.1	9.1	0	0	19.8	0.08	0.13	0	0.8	0	7	4.1	162	-7.6	-48	16.8	0.5	0.2	0.1	1.5	0.8	1.9	0.7	2.3	23.4	0.412	0.215	0.804	0.895	2.744	2.147	13.478	25.224	32.167
10340	27	2018-03-07	1.92296e+06	5.6094e+06	17.6	2.5	9.5	1.8	69	5.8	8.6	0	0	19.4	0.08	0.13	0	0.6	0	6.8	5.2	157	-7.6	-48	16.8	0.5	0.3	0.1	1.5	0.8	1.9	0.7	2.3	23.4	0.447	0.944	1.276	1.692	3.055	4.231	16.446	31.55	34.343
10340	27	2018-06-14	1.92296e+06	5.6094e+06	17.9	2.7	9.1	1.6	69	7.1	8.2	0	0	17.6	0.08	0.13	0	0.6	0	7.1	4	157	-7.6	-48	14.6	1.5	1.5	1.2	3.4	3.6	5.6	5.7	10	9.8	1.437	1.558	2.422	2.753	5.177	7.648	11.069	16.757	32.361
10340	27	2018-09-05	1.92296e+06	5.6094e+06	19.3	3	9.8	1.7	73	8.4	10.3	0.1	0	17.5	0.08	0.13	0	0.9	0	7.3	3.9	172	-7.6	-48	14.1	2.2	2.1	2.4	8	7.2	7.6	6.9	8.2	9.5	1.147	1.457	2.491	7.32	12.048	27.313	26.255	36.117	43.652
10340	27	2018-12-05	1.92296e+06	5.6094e+06	20	3	10.4	1.9	71	7.5	10.2	0.1	0	19.5	0.08	0.13	0	0.7	0	7	4.1	171	-7.6	-48	16.9	0.5	0.3	0.1	1.5	0.8	1.9	0.7	2.3	23.4	0.343	0.178	0.529	0.592	1.904	1.648	2.667	2.646	8.146
10340	27	2019-03-06	1.92296e+06	5.6094e+06	19.4	2.8	9.6	1.8	70	7.4	10.3	0	0	19.6	0.08	0.13	0	0.7	0	7.1	4.2	168	-7.6	-48	17.3	0.6	0.3	0.1	1.5	0.6	2	0.8	2.2	23.4	-0.127	0.106	0.529	0.545	2.489	1.66	2.667	2.485	7.925
10340	27	2019-06-05	1.92296e+06	5.6094e+06	20	2.8	9	1.7	73	8.1	9.6	0.1	0	16.5	0.08	0.13	0	0.6	0	7	3.7	168	-7.6	-48	14.6	1.6	1.3	0.8	3.7	2.6	3.4	1.1	0.9	0.1	1.476	1.697	2.422	2.868	4.553	4.576	6.416	32.718	33.435
10340	27	2019-09-18	1.92296e+06	5.6094e+06	19.5	2.8	9.8	1.8	71	7.6	9.6	0	0	16.9	0.08	0.13	0	0.6	0	7.1	4.5	166	-7.6	-48	14.7	1.7	1.4	0.9	3	2.3	3.9	1.4	2.3	1.6	1.292	1.553	2.422	2.757	5.177	7.534	10.965	16.354	32.27
10340	27	2019-12-19	1.92296e+06	5.6094e+06	19.9	2.9	9.7	1.9	70	8.3	10.1	0	0	21	0.08	0.13	0	0.7	0	6.9	4.6	167	-7.6	-48	17.1	0.5	0.6	0.1	1.6	0.5	1.8	0.7	2.5	23.5	1.317	1.477	1.768	2.692	3.851	4.502	6.481	31.54	33.147
10340	27	2020-03-19	1.92296e+06	5.6094e+06	17.3	2.5	9.2	1.8	69	6.5	9	0	0	19.9	0.08	0.13	0	0.4	0	6.8	4.7	152	-7.6	-48	17.2	0.5	0.3	0.1	1.5	0.8	1.9	0.7	2.3	23.4	0.572	0.855	1.552	2.477	4.018	4.636	25.108	34.864	43.379
10340	27	2020-06-23	1.92296e+06	5.6094e+06	21	3.1	9.9	1.8	72	10.9	9.9	0	0	18.4	0.08	0.13	0	1.2	0	7.1	4.6	176	-7.6	-48	15	1.2	1.5	1.6	2.3	1.5	1.5	0.1	0.1	0.1	0.691	0.823	1.477	1.618	3.068	4.333	6.386	31.731	33.404
15002	24	2010-12-07	1.93527e+06	5.6129e+06	20	2.3	9.9	1.7	75	6.4	8.5	0	0	17.1	0.08	0.13	0	0.2	0.2	8.7	0.9	168	-7.6	-48	14.2	6.9	7.5	12	32.7	30.4	32.7	39.7	45.8	53.1	29.248	30.425	31.417	35.803	41.767	55.759	65.153	78.95	87.904
15002	24	2011-03-07	1.93527e+06	5.6129e+06	19.5	2.4	9.1	1.5	75	6.2	9	0	0	15.1	0.08	0.13	0	0.2	0.1	8.8	1.1	165	-7.6	-48	14.3	6.2	8.3	9.1	27.9	29.4	32.3	39.9	47.9	54.7	24.739	29.311	29.692	35.779	41.767	56.029	65.054	78.672	87.889
15002	24	2011-06-07	1.93527e+06	5.6129e+06	18.4	2.2	10	1.5	73	6.2	8.7	0	0	15.5	0.08	0.13	0	0.2	0.1	8.8	1.6	165	-7.6	-48	14	5.9	8.4	9.6	30.4	32.1	33.7	36.3	40.9	44.1	24.862	29.295	29.692	35.749	41.709	56.827	65.425	78.694	87.887
15002	24	2011-10-03	1.93527e+06	5.6129e+06	19	2.5	9.4	1.4	76	6.4	8.4	0	0	17.2	0.08	0.13	0	0.2	0.1	8.6	1.8	167	-7.6	-48	13.8	4.7	7	8.7	28.7	29.8	32.8	38.5	45.2	50.9	30.729	30.423	31.487	35.8	41.896	55.754	65.236	78.643	87.78
15002	24	2011-12-08	1.93527e+06	5.6129e+06	20	2.5	10.5	1.8	73	6.7	9.8	0	0	15.7	0.08	0.13	0	0.2	0.2	9	1	163	-7.6	-48	14.3	6.5	7.3	11.7	31.6	31	31.5	38.9	46.3	52.3	29.789	30.43	31.433	35.771	41.946	56.723	65.242	79.086	87.962
15002	24	2012-03-13	1.93527e+06	5.6129e+06	19.8	2.5	9.2	1.5	77	6.2	8.2	0	0	16.9	0.08	0.13	0	0.2	0.1	8.6	1.5	163	-7.6	-48	14.2	5.8	7.9	8.2	27.2	29.1	31.3	35.9	42.7	48.9	24.907	29.309	29.692	35.78	41.767	56.024	65.236	78.671	87.889
15002	24	2012-09-25	1.93527e+06	5.6129e+06	21	2.2	10.3	1.8	75	6.6	8.7	0	0	15.4	0.08	0.13	0	0.2	0.2	9	0.8	165	-7.6	-48	14	6.8	7.1	11.6	34.9	33	32.8	38.6	45.2	50	29.799	30.414	31.433	35.799	41.839	55.747	65.153	79.157	87.902
15002	24	2012-12-12	1.93527e+06	5.6129e+06	20	1.7	10.1	2	71	7.1	8.6	0	0	14.3	0.08	0.13	0	0.2	0.2	9.1	0.6	166	-7.6	-48	14.3	6.9	8.7	14.7	33	32.8	31	36.9	43.7	49	29.398	30.403	30.844	35.716	41.265	57.152	65.7	79.085	87.951
15002	24	2013-08-19	1.93527e+06	5.6129e+06	19.6	2.3	8.9	1.4	75	6.5	8.6	0	0	15.9	0.08	0.13	0	0.2	0.1	8.8	1.6	168	-7.6	-48	14	5.2	7.5	8.2	28	29.2	32.4	36.9	44.5	49.8	24.816	29.313	29.723	35.782	41.896	55.758	65.236	78.655	87.85
15002	24	2013-12-11	1.93527e+06	5.6129e+06	19.5	2.7	10.6	1.6	78	6	8.5	0	0	16.9	0.08	0.13	0	0.2	0.1	8.5	2	166	-7.6	-48	13.9	4.6	6.5	8.3	27.7	29.9	32.7	37.3	44.3	49.5	25.187	29.301	29.692	35.409	42.006	56.021	65.336	78.923	87.908
15002	24	2014-03-11	1.93527e+06	5.6129e+06	20	2.5	10.2	1.6	76	6.3	8.5	0	0	16.6	0.08	0.13	0	0.5	0.1	8.6	1.7	164	-7.6	-48	14.3	5.5	7.5	8.3	26.1	28.8	28	33.5	38.4	43.2	25.014	29.31	29.692	35.788	41.767	56.027	65.336	78.923	87.947
15002	24	2014-06-19	1.93527e+06	5.6129e+06	19.1	2.9	9.3	1.4	76	6.2	8.7	0	0	16.7	0.08	0.13	0	0.2	0.1	8.5	2.2	164	-7.6	-48	13.9	4	5.3	8.2	26.3	29.4	32.2	38.1	45	52.2	24.762	29.526	29.723	35.371	41.621	56.021	65.236	78.655	87.85
15002	24	2014-09-11	1.93527e+06	5.6129e+06	18.9	2.9	9.9	1.2	77	5.9	8.4	0	0	17	0.08	0.13	0	0.2	0	8.3	2.5	164	-7.6	-48	13.8	3.5	4.8	6.9	21.2	28.5	32.5	39.1	47.2	52.6	1.724	2.38	4.491	14.621	25.908	31.387	38.023	45.788	53.794
15002	24	2014-12-03	1.93527e+06	5.6129e+06	21	2.6	10.7	1.5	77	6	8.3	0	0	16.9	0.08	0.13	0	0.2	0.1	8.7	1	168	-7.6	-48	13.9	5.9	8.1	11.5	29.8	31.8	36.2	40.3	48.3	55	25.002	29.302	29.692	35.779	42.006	56.024	65.153	78.92	87.908
15002	24	2015-03-04	1.93527e+06	5.6129e+06	19.4	2.3	11.1	1.7	77	5.7	8.3	0	0	16	0.08	0.13	0	0.2	0.1	8.7	1	167	-7.6	-48	14.2	6.4	9.4	11.5	28.7	29.3	32.2	38.5	45.4	52.4	29.312	30.424	31.417	35.794	41.946	55.892	65.153	79.106	87.962
15002	24	2015-06-17	1.93527e+06	5.6129e+06	19.7	2.5	10.9	1.6	77	6	9.3	0	0	16.2	0.08	0.13	0	0.2	0.1	8.6	1.2	168	-7.6	-48	13.8	5.4	7.7	9.6	27.7	30.9	34.4	38.8	46.9	53.4	30.843	30.419	31.456	35.792	42.076	56.024	65.336	78.912	87.838
15002	24	2015-09-09	1.93527e+06	5.6129e+06	21	2.8	10.2	1.5	77	6.1	8.6	0	0	17	0.08	0.13	0	0.5	0.1	8.6	1.3	165	-7.6	-48	13.9	6.4	8.8	10.1	27.8	30.9	33.9	40.4	45.8	52.2	25.284	29.525	29.692	35.348	41.827	56.024	65.336	78.921	87.908
15002	24	2015-12-01	1.93527e+06	5.6129e+06	20	2.6	9	1.5	76	6.2	8	0	0	16.4	0.08	0.13	0	0.5	0.1	8.5	1.3	167	-7.6	-48	14	6.1	8.4	9.4	27.1	29.6	32.5	38.8	45	51.5	24.809	29.311	29.692	35.765	41.827	56.025	65.236	78.672	87.85
15002	24	2016-03-09	1.93527e+06	5.6129e+06	21	2.4	10.3	1.6	78	6	8.4	0	0	17.9	0.08	0.13	0	0.2	0.1	8.7	1.1	170	-7.6	-48	14.2	5.8	7.2	9.5	28.3	29.7	33	39.4	45.5	52.9	25.536	29.318	29.692	35.411	41.946	56.024	65.153	78.921	87.947
15002	24	2016-06-08	1.93527e+06	5.6129e+06	19.7	2.7	9.7	1.6	80	6	8.2	0	0	17.8	0.08	0.13	0	0.2	0.1	8.1	1.5	170	-7.6	-48	14	5.9	7.8	8.6	26.3	28.2	32	38.7	46.4	53.9	25.43	29.763	29.692	35.408	41.827	56.025	65.336	78.691	87.85
15002	24	2016-09-27	1.93527e+06	5.6129e+06	19.4	2.6	9.9	1.4	76	6.1	8.3	0	0	16.6	0.08	0.13	0	0.2	0.1	8.5	1.4	167	-7.6	-48	13.9	5.7	8.2	9.4	27.4	29.6	34	40.3	45.6	52	25.209	29.305	29.723	35.779	41.827	56.024	65.336	78.752	87.85
15002	24	2016-12-07	1.93527e+06	5.6129e+06	19.9	2.7	9.7	1.5	82	6.5	9	0	0	16.1	0.08	0.13	0	0.2	0.1	8.4	1.1	172	-7.6	-48	14.1	6.5	9.4	11.7	30.3	30.8	34.1	39.4	47	53.2	25.006	29.756	29.692	35.404	41.564	55.131	65.153	78.677	87.884
15002	24	2017-03-08	1.93527e+06	5.6129e+06	19.3	2.6	9.2	1.4	79	5.8	8.2	0	0	17.9	0.08	0.13	0	0.2	0.2	8.5	1.7	169	-7.6	-48	13.9	5.9	8.2	10.2	31.9	32.7	34.9	37.9	45.7	48.7	25.108	29.757	29.723	35.393	41.827	56.024	65.236	78.655	87.85
15002	24	2017-06-29	1.93527e+06	5.6129e+06	20	2.9	9.9	1.5	80	5.9	8.4	0	0	16.9	0.08	0.13	0	0.2	0.2	8.4	1.5	167	-7.6	-48	13.8	6.1	9.6	12.3	32.7	35.1	36.3	38.9	44.8	48.5	30.874	31.083	31.456	34.972	41.621	56.025	65.336	78.758	87.78
15002	24	2017-09-06	1.93527e+06	5.6129e+06	19.8	2.9	9.4	1.4	77	6.5	8.6	0	0	18.2	0.08	0.13	0	0.2	0.1	8.4	1.5	166	-7.6	-48	13.9	6.2	9	11.2	30.1	29.1	33.2	39.3	46.3	52.6	24.841	29.533	29.723	35.362	41.621	55.77	65.236	78.785	87.85
15002	24	2017-12-06	1.93527e+06	5.6129e+06	19.8	2.8	9.5	1.5	77	6.5	8.5	0	0	17.6	0.08	0.13	0	0.4	0.2	8.4	0.9	173	-7.6	-48	14.4	6.9	7.8	12.9	31	29.2	32.4	40.8	48.3	56.5	24.865	29.52	29.692	35.355	41.697	55.76	65.054	78.833	87.889
15002	24	2018-03-07	1.93527e+06	5.6129e+06	19.2	2.7	9.9	1.4	77	6	8.9	0	0	19.1	0.08	0.13	0	0.2	0.1	8.4	1.6	168	-7.6	-48	14.1	5.7	7.7	8.4	26.9	28.5	33	37.7	45.1	51.2	25.271	29.328	29.752	35.817	41.697	56.038	65.336	78.882	87.884
15002	24	2018-06-14	1.93527e+06	5.6129e+06	19.2	2.8	9.8	1.4	77	6.5	8.1	0	0	17.8	0.08	0.13	0	0.2	0.1	8	1.7	167	-7.6	-48	13.7	4.8	7	9.3	27.6	27.6	33.1	38.8	47.2	54.6	30.811	30.643	31.487	35.357	41.827	55.757	65.336	78.658	87.78
15002	24	2018-09-05	1.93527e+06	5.6129e+06	19	2.7	10	1.4	76	6.7	8.3	0	0	16.8	0.08	0.13	0	0.6	0.1	8.4	1.2	165	-7.6	-48	13.6	6.5	9.7	11.4	27.6	32.1	35	38.3	46.3	50.6	30.796	30.423	31.503	35.796	41.827	55.757	65.488	78.779	87.838
15002	24	2018-12-05	1.93527e+06	5.6129e+06	19.9	2.8	10.1	1.4	76	6.5	8.1	0	0	18	0.08	0.13	0	0.2	0.1	8.5	1.6	167	-7.6	-48	14.3	4.4	6.8	8.5	24.9	27.6	29.5	37.1	45.2	52.5	24.873	29.541	29.723	35.366	41.697	55.759	65.336	78.905	87.947
15002	24	2019-03-06	1.93527e+06	5.6129e+06	19.8	2.8	9.7	1.3	76	6.4	8.1	0	0	18.1	0.08	0.13	0	0.2	0.1	8.4	1.6	166	-7.6	-48	14	4.4	6	8.7	25.7	27.4	30.8	38.2	45.6	52.9	24.854	29.541	29.723	35.364	41.827	55.771	65.336	78.544	87.85
15002	24	2019-06-05	1.93527e+06	5.6129e+06	20	2.7	8.9	1.3	78	6.4	7.7	0	0	16.3	0.08	0.13	0	0.2	0.1	8.4	1.6	166	-7.6	-48	13.7	4.6	6.6	8.9	27.5	29	32	39.3	48.3	54.5	30.682	30.421	31.487	35.398	41.827	55.757	65.236	78.528	87.78
15002	24	2019-09-18	1.93527e+06	5.6129e+06	19.6	2.9	9.6	1.4	77	6.6	7.9	0	0	17.5	0.08	0.13	0	0.4	0.1	8.5	1.8	163	-7.6	-48	13.7	4.4	6.2	8.8	27.1	28.8	31.4	38.7	46.7	53.9	30.714	30.641	31.503	35.359	41.621	55.754	65.236	78.646	87.78
15002	24	2019-12-18	1.93527e+06	5.6129e+06	22	2.9	10.1	1.5	75	6.6	8.5	0	0	17.9	0.08	0.13	0	0.2	0.1	8.6	0.1	164	-7.6	-48	14	12.8	17.1	17.4	31	30.6	30.7	34.8	41.1	46.5	32.864	31.724	30.984	35.338	40.598	55.449	64.575	78.907	87.827
15002	24	2020-03-18	1.93527e+06	5.6129e+06	19.3	2.2	9.5	1.5	78	6.3	8.5	0	0	17.6	0.08	0.13	0	0.2	0.1	8.8	1	163	-7.6	-48	13.8	6.2	7.7	11	31.9	31.4	34.1	39.3	45.4	51.8	30.721	30.404	31.456	35.395	41.709	56.025	65.054	78.659	87.759
15002	24	2020-06-22	1.93527e+06	5.6129e+06	21	2.9	9.8	1.5	77	6.3	8.4	0	0	18.1	0.08	0.13	0	0.2	0.1	8.4	1.5	163	-7.6	-48	14	5	7.4	8.7	26.9	28.2	32.2	39.2	47.9	54.7	24.934	29.538	29.692	35.357	41.621	56.039	65.336	78.672	87.85
15003	23	2010-12-07	1.93527e+06	5.6129e+06	23	2.8	9.7	1.5	87	6.2	9.5	0.1	0	19.8	0.08	0.13	0	2.5	0	8.1	0.3	182	-7.6	-48	14.3	7.2	9.8	15	20.3	25.2	28.4	37.4	45.9	53.9	3.53	4.151	6.445	19.696	24.322	30.664	38.355	47.169	54.496
15003	23	2011-03-07	1.93527e+06	5.6129e+06	21	2.7	8.6	1.3	87	6	10.2	0.1	0	17.4	0.08	0.13	0	0.1	0	8.2	0.2	180	-7.6	-48	14.2	6.1	7.6	8	19	23.6	26.8	35.4	44.2	52.6	1.459	1.925	4.199	10.223	23.452	30.901	38.322	47.469	54.814
15003	23	2011-06-07	1.93527e+06	5.6129e+06	21	2.6	9.6	1.3	86	6	8.8	0.1	0	17.9	0.08	0.13	0	0.1	0	8.1	1.6	180	-7.6	-48	14	4.8	6.2	7.2	19.1	27.4	31.4	40.2	48	55	1.733	2.537	4.577	17.751	24.504	30.609	37.957	46.493	54.814
15003	23	2011-10-03	1.93527e+06	5.6129e+06	22	2.8	9.4	1.4	87	6.2	9.5	0.1	0	19.2	0.08	0.13	0	0.1	0	8.1	0.3	181	-7.6	-48	13.8	6.9	7.5	9.8	20.9	26.7	31.7	40.9	49.5	58.1	2.003	2.581	4.583	13.478	24.903	30.571	38.216	47.365	54.814
15003	23	2011-12-08	1.93527e+06	5.6129e+06	23	3	10.3	1.6	87	6.2	10.3	0.1	0	18.6	0.08	0.13	0	0.1	0	8.2	0.2	178	-7.6	-48	14.2	6.5	6.9	9.7	19.5	25.7	29.6	38.4	47.6	56.1	1.435	1.957	4.22	11.751	22.741	28.11	36.99	46.482	54.856
15003	23	2012-03-13	1.93527e+06	5.6129e+06	23	2.9	9.7	1.5	87	6	10.1	0.1	0	19.5	0.08	0.13	0	0.1	0	8.2	0.4	177	-7.6	-48	14.2	5.8	8.2	8.9	19.5	26	30.1	40.4	49.4	57.9	1.379	1.982	4.22	13.527	25.014	30.644	38.439	47.357	54.814
15003	23	2012-09-25	1.93527e+06	5.6129e+06	24	2.8	9.7	1.6	88	6.1	9.8	0.1	0	18.4	0.08	0.13	0	0.1	0	8.2	0.3	177	-7.6	-48	14.2	6.6	7.6	9.2	20.2	25.6	29.2	38.9	48	56.6	1.738	2.544	4.57	17.346	24.436	30.649	38.866	47.245	54.888
15003	23	2012-12-12	1.93527e+06	5.6129e+06	23	2.8	9.5	1.5	88	6.8	9.9	0.1	0	18.1	0.08	0.13	0	0.1	0	8.2	0.2	181	-7.6	-48	14.4	6	5.2	7.8	17.6	23.3	26.5	36.2	45.4	53.7	1.597	1.829	3.41	6.468	9.488	9.559	13.382	20.328	32.539
15003	23	2013-08-19	1.93527e+06	5.6129e+06	23	2.8	9.9	1.5	87	6.3	9.5	0.1	0	18.7	0.08	0.13	0	0.1	0	8.2	0.3	180	-7.6	-48	14	6.8	7.8	10.3	19.4	26.1	30.7	40	48.9	57.6	1.811	2.564	4.583	13.452	24.178	30.648	38.273	47.346	54.856
15003	23	2013-12-11	1.93527e+06	5.6129e+06	23	3	10.7	1.6	89	5.7	9.5	0.1	0	19.2	0.08	0.13	0	0.1	0	7.9	0.3	180	-7.6	-48	13.9	6.4	7.2	9.9	22	26.7	31.7	41.1	49.5	58.3	1.821	2.577	4.551	17.653	23.487	30.644	38.866	47.144	54.856
15003	23	2014-03-11	1.93527e+06	5.6129e+06	23	2.7	10.3	1.6	88	6.2	9.5	0.1	0	19.1	0.08	0.13	0	0	0	8.1	0.2	180	-7.6	-48	14.2	6.5	6.5	9.1	19.5	25.2	29.2	38.5	47.5	56	1.801	2.559	4.55	17.237	23.228	28.102	36.99	46.284	54.856
15003	23	2014-06-19	1.93527e+06	5.6129e+06	23	2.8	9.6	1.5	88	5.9	10.4	0.1	0	18.9	0.08	0.13	0	0.2	0	8	0.1	180	-7.6	-48	13.9	6.9	7.5	10.8	23.1	27.4	30.9	38.8	46.8	54.6	1.419	1.994	4.233	13.03	23.576	30.648	38.273	47.345	54.814
15003	23	2014-09-11	1.93527e+06	5.6129e+06	22	2.8	10.3	1.4	87	5.7	9.3	0.1	0	19.2	0.08	0.13	0	0	0	8	0.3	180	-7.6	-48	13.9	6.9	7.4	9.1	20.8	26.8	32.6	41	50	58.4	1.814	2.572	4.531	21.325	23.175	28.05	36.307	46.308	54.856
15003	23	2014-12-03	1.93527e+06	5.6129e+06	23	3.1	10.5	1.6	87	5.8	9.3	0.1	0	19.9	0.08	0.13	0	0.1	0	8.2	0.2	181	-7.6	-48	13.9	6.8	8.1	10.4	21.1	28	31.8	41.4	51.1	59.9	1.841	2.579	4.583	17.339	23.487	30.644	39.14	47.123	54.856
15003	23	2015-03-04	1.93527e+06	5.6129e+06	23	2.9	10.7	1.6	88	5.4	9.3	0.1	0	18.9	0.08	0.13	0	0	0	8	0.2	180	-7.6	-48	14.1	6.2	7.5	8.4	21.1	26.1	30	38.9	48.2	56.2	1.808	2.569	4.531	21.247	23.286	28.136	36.99	46.284	54.856
15003	23	2015-06-17	1.93527e+06	5.6129e+06	23	2.9	11.1	1.7	88	5.7	10.4	0.1	0	18.9	0.08	0.13	0	0.1	0	7.8	0.3	180	-7.6	-48	13.9	6.6	7.8	9.7	21.3	27	30.9	39.4	48.4	56.5	1.498	1.931	4.233	13.087	22.741	28.111	37.152	46.492	54.856
15003	23	2015-09-09	1.93527e+06	5.6129e+06	24	3.1	10	1.5	87	6	9.4	0.1	0	20	0.08	0.13	0	0.1	0	8.2	0.3	180	-7.6	-48	13.9	6.9	7.3	9.6	21.3	27.3	31.9	42.1	51.4	59.8	5.788	9.67	16.374	24.456	29.33	36.473	47.628	55.384	61.772
15003	23	2015-12-01	1.93527e+06	5.6129e+06	23	2.8	9.2	1.5	87	5.9	9	0.1	0	18.8	0.08	0.13	0	0.1	0	8	0.2	181	-7.6	-48	14	6.7	7.6	8.7	21.4	26.4	30	39.9	50	58.2	1.828	2.563	4.572	17.095	24.322	30.649	38.273	47.138	54.814
15003	23	2016-03-09	1.93527e+06	5.6129e+06	24	3	10.1	1.6	89	5.9	9.3	0.1	0	21	0.08	0.13	0	0.1	0	8.2	0.2	182	-7.6	-48	14.2	6.6	6.3	8.8	21.2	26.6	29.7	40.7	48.8	57.8	5.758	9.673	16.374	24.46	29.499	36.515	47.628	55.412	61.777
15003	23	2016-06-08	1.93527e+06	5.6129e+06	22	2.9	9.8	1.7	89	5.8	9.2	0.1	0	20	0.08	0.13	0	0.1	0	8	0.3	184	-7.6	-48	13.9	6.3	6.1	9.3	21.9	27.4	31.7	42	52.2	61.5	5.803	9.229	12.676	24.235	29.201	36.498	47.628	55.431	61.824
15003	23	2016-09-27	1.93527e+06	5.6129e+06	22	2.9	9.7	1.4	86	5.9	9.3	0.1	0	18.9	0.08	0.13	0	0.1	0	8.1	0.2	182	-7.6	-48	13.9	6.6	5.8	9.1	21.9	26.3	30.5	40	48.3	56.5	1.728	2.58	4.583	17.198	24.212	30.577	37.957	46.241	54.814
15003	23	2016-12-07	1.93527e+06	5.6129e+06	22	2.8	9.4	1.4	90	6	10.2	0.1	0	18.2	0.08	0.13	0	0.1	0	8	0.1	182	-7.6	-48	14.2	6.5	6.9	9.3	20.9	25.5	29.3	38.6	47	55.4	1.41	1.956	4.22	13.093	23.465	30.576	38.216	47.274	54.814
15003	23	2017-03-08	1.93527e+06	5.6129e+06	22	2.6	9	1.4	87	5.7	9.1	0.1	0	19.6	0.08	0.13	0	0.1	0	8.1	0.2	180	-7.6	-48	13.9	6.7	8.1	8.2	21.6	26.9	30.6	40.1	49	57	1.855	2.578	4.583	17.22	24.212	30.572	38.382	47.138	54.814
15003	23	2017-06-29	1.93527e+06	5.6129e+06	23	2.9	9.8	1.6	88	5.7	9.6	0.1	0	19	0.08	0.13	0	0.1	0	8	0.2	180	-7.6	-48	13.8	6.2	6.1	9.6	22	26.7	32.1	41.1	51.3	59.9	2.118	3.24	5.306	38.109	40.79	55.08	65.537	78.083	87.612
15003	23	2017-09-06	1.93527e+06	5.6129e+06	23	2.9	9.5	1.5	87	6.1	9.6	0.1	0	21	0.08	0.13	0	0.1	0	8	0	181	-7.6	-48	13.9	7.7	8.6	12.6	22.3	26.3	30	38.4	46	54.3	8.256	9.231	12.676	24.115	29.369	36.467	45.423	55.094	61.63
15003	23	2017-12-06	1.93527e+06	5.6129e+06	23	2.9	9.4	1.5	86	6.2	10	0.1	0	20	0.08	0.13	0	0.1	0	8	0	187	-7.6	-48	14.2	7.5	8.4	11.5	21.8	26.5	28.9	37.7	45.4	53.5	8.193	9.239	12.676	20.18	24.211	30.582	38.334	46.998	52.492
15003	23	2018-03-07	1.93527e+06	5.6129e+06	22	2.7	10	1.5	87	6.3	9.5	0.1	0	21	0.08	0.13	0	0	0	8	0	183	-7.6	-48	14.1	7.3	8.7	11.2	21.1	26.4	29.8	37.8	45.6	53.6	8.418	11.862	15.879	21.186	23.049	28.011	36.226	46.147	52.534
15003	23	2018-06-14	1.93527e+06	5.6129e+06	23	2.9	9.9	1.5	86	6.5	9.2	0.1	0	20	0.08	0.13	0	0.1	0	8	0	182	-7.6	-48	13.7	14.6	18.7	15.9	24.3	29.8	32.8	41.7	48.4	56.2	8.803	11.586	15.453	20.505	23.376	30.582	37.991	46.164	52.534
15003	23	2018-09-05	1.93527e+06	5.6129e+06	22	2.9	9.8	1.5	86	6.7	9.3	0.1	0	19.2	0.08	0.13	0	0.1	0	8	0.1	182	-7.6	-48	13.6	7.2	7.6	10.9	22.8	29.4	32	40.3	49.8	57.5	3.997	4.149	5.476	29.489	41.373	54.811	65.633	78.821	87.667
15003	23	2018-12-05	1.93527e+06	5.6129e+06	24	3	10.3	1.6	88	6.5	9.2	0.1	0	20	0.08	0.13	0	0.1	0	8	0.1	182	-7.6	-48	14.2	7.2	8	11.2	22.6	26.2	29	38.5	47.5	56	8.552	12.025	16.418	20.549	23.49	30.582	38.138	46.277	52.607
15003	23	2019-03-06	1.93527e+06	5.6129e+06	23	2.8	10	1.5	87	6.4	9	0.1	0	20	0.08	0.13	0	0	0	8.1	0.1	183	-7.6	-48	14.2	6.5	6.6	10	22.8	25.7	29.5	38.6	47.8	56.1	8.477	11.86	15.879	21.221	23.159	28.079	36.226	46.147	52.534
15003	23	2019-06-05	1.93527e+06	5.6129e+06	24	2.8	9	1.5	89	6.4	8.8	0.1	0	18.6	0.08	0.13	0	0	0	8	0.4	185	-7.6	-48	13.7	6.6	8	9.9	20.7	26.7	31.9	42.5	53	62.5	2.11	3.125	5.14	34.342	42.078	54.963	66.016	78.704	87.721
15003	23	2019-09-18	1.93527e+06	5.6129e+06	23	2.9	9.5	1.5	86	6.7	9	0.1	0	19.7	0.08	0.13	0	0.4	0	8.2	0.2	180	-7.6	-48	13.7	6.8	7.7	10	21.3	28.2	31.5	41.5	50.7	58.9	2.024	2.497	4.317	11.724	23.576	30.644	38.121	46.507	54.814
15003	23	2019-12-18	1.93527e+06	5.6129e+06	25	3.1	9.9	1.5	87	6.7	9.5	0.1	0	21	0.08	0.13	0	0	0	8.1	0.2	179	-7.6	-48	14	7.1	8.4	9.4	19.9	26.3	29.6	41.4	50	59.1	5.744	9.464	14.068	21.126	23.274	28.085	36.622	46.343	52.607
15003	23	2020-03-18	1.93527e+06	5.6129e+06	20	2.5	9.4	1.5	88	6.3	9.7	0.1	0	21	0.08	0.13	0	0.1	0	8	0.2	178	-7.6	-48	13.7	6.7	5.9	9.9	20.9	27.6	31.3	41.1	50.7	59.5	5.967	9.107	12.676	20.092	24.101	30.509	38.794	47.023	52.492
15003	23	2020-06-22	1.93527e+06	5.6129e+06	23	3	10.1	1.6	87	6.3	9.4	0.1	0	21	0.08	0.13	0	0.1	0	8.1	0.3	180	-7.6	-48	14	7	8.3	10.3	19.3	26.4	30.9	41.6	52	61.7	5.756	9.44	12.676	20.355	23.376	30.582	39.527	51.271	57.753
15011	32	2010-12-08	1.92412e+06	5.60523e+06	27	3.5	12.9	1.2	80	20	7.3	0	0	18.6	0.08	0.13	0	0.1	0	7.8	2.5	219	-7.6	-48	14.9	3.2	4.1	5.6	7.5	15.7	21.4	27.9	36	43.8	1.63	2.113	3.067	3.895	14.675	31.966	39.161	50.141	60.341
15011	32	2011-03-08	1.92412e+06	5.60523e+06	24	3.4	12	1.1	85	20	7.7	0	0	16.2	0.08	0.13	0	0.1	0	7.5	2.3	219	-7.6	-48	15	3	3.6	4.6	5.4	12.1	17.5	25.1	32.8	41.2	1.573	1.429	1.835	2.504	13.702	32.022	39.291	50.254	60.341
15011	32	2011-06-09	1.92412e+06	5.60523e+06	24	3.7	11.6	1.1	84	19	7.7	0	0	17.2	0.08	0.13	0	0.2	0	7.8	2.1	221	-7.6	-48	14.8	3.2	3.9	5.2	8	15.2	21.5	32.9	43.9	51.8	2.27	2.637	3.166	3.91	14.534	32.011	39.306	54.363	65.056
15011	32	2011-09-30	1.92412e+06	5.60523e+06	25	3.7	12.4	1.1	84	19.8	7.7	0	0	17.7	0.08	0.13	0	0.1	0	7.8	2.2	216	-7.6	-48	14.8	3.5	4.4	5.6	8.3	18	23.6	33.5	44	51.6	2.4	2.638	3.166	3.909	15.002	32.186	39.306	54.363	65.056
15011	32	2011-12-07	1.92412e+06	5.60523e+06	26	3.3	12.7	1.2	84	21	9.1	0	0	17.1	0.08	0.13	0	0.1	0	7.7	2.2	216	-7.6	-48	14.9	3.3	4	4.9	7	15.5	22.3	32	41.1	51.2	1.66	2.084	3.067	3.894	13.793	32.158	39.115	50.004	60.341
15011	32	2012-03-07	1.92412e+06	5.60523e+06	24	3.2	11.5	1.1	93	21	7.4	0	0	16.3	0.08	0.13	0	0.1	0	7.8	2.5	211	-7.6	-48	14.8	3.1	3.9	5.4	7.4	15.9	22.6	28.5	37.7	45.7	1.522	1.511	2.498	2.85	14.47	32.03	39.47	54.109	65.056
15011	32	2012-06-20	1.92412e+06	5.60523e+06	25	3.3	12.6	1.2	85	20	7.6	0	0	16.9	0.08	0.13	0	0.1	0	7.8	2.2	214	-7.6	-48	14.7	3.5	4.4	5.4	9.1	18.4	25.3	36	47.3	55.8	2.184	2.692	3.157	3.893	15.426	32.433	39.306	54.11	65.079
15011	32	2012-09-25	1.92412e+06	5.60523e+06	25	3.4	12.6	1.2	84	21	7.7	0	0	17.2	0.08	0.13	0.1	0.1	0	7.8	2.3	214	-7.6	-48	14.9	6.6	10.6	15.1	12.5	26.1	39.9	53.9	67	77.9	8.856	13.88	15.417	20.734	21.503	31.963	38.619	49.839	59.91
15011	32	2012-12-12	1.92412e+06	5.60523e+06	25	3.5	12	1.2	85	22	7.9	0	0	17.6	0.08	0.13	0	0.1	0	7.7	2.3	218	-7.6	-48	14.9	3.2	4	5.3	6.9	16.3	22.3	32.2	43	50.8	1.656	2.087	3.076	3.895	13.352	32.236	39.291	50.249	60.341
15011	32	2013-08-16	1.92412e+06	5.60523e+06	25	3.4	13.3	1.3	84	20	7.5	0	0	17.7	0.08	0.13	0	0.1	0	7.4	2.2	222	-7.6	-48	15	3.3	4.1	5.2	5.6	13.8	18.8	25.7	33.8	42	1.547	1.441	1.835	2.539	13.659	31.947	39.291	50.253	60.341
15011	32	2013-12-10	1.92412e+06	5.60523e+06	25	3.3	12.8	1.2	85	19.4	7.7	0	0	17.7	0.08	0.13	0	0.1	0	7.6	2.3	215	-7.6	-48	14.8	3.1	3.9	5.2	6.8	15.7	22	30.7	40	48.5	1.505	1.492	1.835	2.489	13.702	31.741	39.291	50.002	60.341
15011	32	2014-03-13	1.92412e+06	5.60523e+06	26	3.6	13.1	1.2	84	21	7.5	0	0	17.8	0.08	0.13	0	0.1	0	7.8	2.3	217	-7.6	-48	15.3	3	3.8	5.2	5.1	13.8	16.7	21.7	28.5	34.8	1.469	1.468	2.012	2.493	14.856	31.751	39.209	50.243	60.341
15011	32	2014-06-25	1.92412e+06	5.60523e+06	24	3.3	12.5	1.2	84	21	7.7	0	0	17.5	0.08	0.13	0	0.1	0	7.7	2.3	217	-7.6	-48	15.1	3	3.9	5.1	5.9	14.2	18.8	24.8	32.4	39.4	1.651	2.034	3.067	3.898	13.793	32.24	39.291	50.003	60.341
15011	32	2014-09-12	1.92412e+06	5.60523e+06	24	3.4	13.4	1.3	84	20	7.6	0	0	18.8	0.08	0.13	0	0.1	0	7.7	2.2	218	-7.6	-48	14.4	3.9	4.7	5.9	10.6	21.1	27.3	39.1	49.5	58.7	2.52	2.735	4.135	5.575	14.447	30.732	38.981	48.848	60.209
15011	32	2014-12-04	1.92412e+06	5.60523e+06	24	3.4	13.3	1.2	84	20	8	0	0	18	0.08	0.13	0	0.2	0	7.7	2.3	220	-7.6	-48	15.1	3	3.8	5.1	5.9	14.3	18	23.8	32.5	39.7	1.619	2.042	3.067	3.902	13.793	31.962	39.194	50.141	60.341
15011	32	2015-03-05	1.92412e+06	5.60523e+06	26	3.5	13.3	1.2	85	21	7.1	0	0	17.2	0.08	0.13	0	0.1	0	7.4	2.3	216	-7.6	-48	14.9	3.2	4	5.6	6.4	14.6	21.1	28.3	36.4	45.8	1.671	2.068	3.892	4.423	13.76	32.247	39.243	50.252	60.341
15011	32	2015-06-18	1.92412e+06	5.60523e+06	27	3.5	13.9	1.4	84	21	7.6	0	0	17.2	0.08	0.13	0	0.1	0	7.5	2.1	220	-7.6	-48	14.8	3.6	4.6	5.4	8.5	15.8	21.2	29.7	38.3	46.4	1.572	1.492	1.843	2.538	13.667	32.045	39.291	50.255	60.341
15011	32	2015-12-02	1.92412e+06	5.60523e+06	25	3.8	13.2	1.2	84	20	7.5	0	0	17.6	0.08	0.13	0	0.1	0	7.6	2.1	218	-7.6	-48	15	3.4	4.2	5.6	6.5	14.8	19.7	28.4	37.7	45.7	2.443	2.555	3.076	3.899	13.793	32.247	39.291	50.256	60.341
15011	32	2016-03-10	1.92412e+06	5.60523e+06	26	3.7	12.3	1.2	84	22	7.6	0	0	18.9	0.08	0.13	0	0.1	0	7.8	2.3	222	-7.6	-48	15.1	2.9	3.8	4.9	6.1	13.7	18	27.2	36.5	44.3	2.374	2.613	3.166	3.931	14.507	31.967	39.209	50.125	60.341
15011	32	2016-06-09	1.92412e+06	5.60523e+06	26	3.6	13.2	1.3	85	21	7.6	0	0	18.3	0.08	0.13	0	0.1	0	7.7	2.2	222	-7.6	-48	14.5	3.8	4.8	6.1	10.4	20.4	26.5	37.7	48.5	57.6	2.545	2.697	3.076	5.076	14.226	32.145	39.134	48.971	60.173
15011	32	2016-09-28	1.92412e+06	5.60523e+06	25	3.7	13.9	1.2	85	22	7.7	0	0	17.8	0.08	0.13	0	0.3	0	7.7	2.1	220	-7.6	-48	14.9	3.5	4.4	6	7.9	17.2	22.5	31.6	40.1	48.2	2.39	2.624	3.108	3.901	13.367	31.974	39.194	50.249	60.341
15011	32	2016-12-08	1.92412e+06	5.60523e+06	25	3.5	11.8	1.1	88	21	7.4	0	0	18.2	0.08	0.13	0	0.2	0	7.6	2.3	223	-7.6	-48	15	3.3	4	5.5	5.8	13.9	20.4	29.4	38.5	46.6	1.769	2.026	3.076	3.912	13.379	31.968	39.404	54.361	65.056
15011	32	2017-03-08	1.92412e+06	5.60523e+06	24	3.5	12.4	1.2	83	21	7.2	0	0	18.8	0.08	0.13	0	0.3	0	7.6	2.1	220	-7.6	-48	15	3.4	4.2	5.6	6.9	15.7	20.7	29.1	38.3	46.3	1.652	2.036	3.924	4.42	13.809	31.966	39.146	50.132	60.341
15011	32	2017-06-29	1.92412e+06	5.60523e+06	26	3.6	13.2	1.3	86	21	7.7	0	0	17.7	0.08	0.13	0	0.4	0	7.7	2.1	221	-7.6	-48	14.9	3.5	4.4	5.9	8.2	16.7	21.4	29.5	37.4	44.4	1.562	1.509	2.547	2.888	13.809	31.954	39.291	50.254	60.341
15011	32	2017-09-06	1.92412e+06	5.60523e+06	26	3.7	12.7	1.2	84	22	7.7	0	0	19.1	0.08	0.13	0	0.8	0	7.6	2.1	220	-7.6	-48	15.2	3.2	3.7	5	5.8	11.2	15	21.3	29.6	36.6	2.374	2.615	3.108	4.275	13.367	31.947	39.194	50.113	60.341
15011	32	2017-12-06	1.92412e+06	5.60523e+06	26	3.7	12.2	1.2	83	21	6.7	0	0	19.4	0.08	0.13	0	0.2	0	7.7	2.1	225	-7.6	-48	15.1	3.3	4	5.2	6.2	13.3	17.9	26.9	37.2	44.9	2.375	2.636	3.892	4.792	13.793	31.917	39.146	50.131	60.341
15011	32	2018-03-07	1.92412e+06	5.60523e+06	25	3.4	12.8	1.2	83	21	8.3	0	0	19.7	0.08	0.13	0	0.6	0	7.7	3	220	-7.6	-48	15.7	2.7	3.3	4.2	3.3	8.1	9.3	14.5	20.5	25.8	1.46	1.497	1.786	2.75	13.71	31.71	39.301	54.368	65.137
15011	32	2018-06-14	1.92412e+06	5.60523e+06	25	3.5	13.3	1.2	83	22	7.9	0	0	18.7	0.08	0.13	0	1.3	0	7.6	2.2	224	-7.6	-48	14.7	4	4.9	7.2	10.6	16	22.4	33.4	43.7	52.2	2.193	2.678	3.108	3.875	13.83	32.135	39.299	50.063	60.369
15011	32	2018-09-05	1.92412e+06	5.60523e+06	24	3.6	13.3	1.2	82	21	7.3	0	0	17.8	0.08	0.13	0	0.3	0	7.7	2.2	220	-7.6	-48	14.5	3.6	4.7	6.3	10.2	20.4	26.1	37.9	48.7	58.4	2.65	2.689	3.108	5.213	14.271	32.146	39.086	49.085	60.173
15011	32	2018-12-05	1.92412e+06	5.60523e+06	26	3.5	12.8	1.2	83	21	7.1	0	0	18.5	0.08	0.13	0	0.2	0	7.8	2.2	223	-7.6	-48	15.4	3.2	3.9	4.7	4.1	12.4	14.9	23.5	31.1	38.7	1.461	1.474	2.828	2.797	14.948	31.751	39.161	50.13	60.341
15011	32	2019-03-06	1.92412e+06	5.60523e+06	25	3.5	13.1	1.2	83	21	6.9	0	0	18.8	0.08	0.13	0	1.5	0	7.8	2.2	223	-7.6	-48	14.8	4	5	6.4	9.7	16.8	21.9	31.5	40.7	47.5	1.649	2.118	4.014	4.395	14.963	31.201	39.251	50.069	60.369
15011	32	2019-06-05	1.92412e+06	5.60523e+06	27	3.5	12.4	1.2	86	21	6.8	0	0	18.1	0.08	0.13	0	2.1	0	7.8	2.2	224	-7.6	-48	14.5	4.6	7	11.7	13.4	18.9	25	35.3	44.5	54.3	2.611	2.709	4.106	5.536	16.751	32.003	38.855	48.966	60.201
15011	32	2019-09-18	1.92412e+06	5.60523e+06	26	3.6	13	1.2	82	22	7	0	0	17.1	0.08	0.13	0	0.6	0	7.9	2.2	216	-7.6	-48	14.7	3.6	4.6	6.1	9.1	20.2	23.7	31.8	41.6	48.8	2.148	2.755	4.014	4.886	14.985	31.666	39.242	50.485	60.341
15011	32	2019-12-19	1.92412e+06	5.60523e+06	26	3.7	12.5	1.2	83	21	7.5	0	0	19.4	0.08	0.13	0	0.2	0	7.8	1.9	217	-7.6	-48	14.9	3.7	4.7	5.7	8.1	16.7	22.9	35.2	46.4	55.5	2.387	2.701	3.166	4.252	14.948	31.925	39.209	50.131	60.341
15011	32	2020-03-19	1.92412e+06	5.60523e+06	25	3.5	12.4	1.2	86	21	7.6	0	0	19.6	0.08	0.13	0	1	0	7.6	1.9	216	-7.6	-48	14.7	4.2	5.4	6.6	9	17.6	24.4	36.6	47.6	56.3	2.2	2.729	3.108	4.265	14.158	32.091	39.299	50.13	60.341
15011	32	2020-06-23	1.92412e+06	5.60523e+06	27	3.6	12.9	1.2	85	21	7.2	0	0	17.9	0.08	0.13	0	0.7	0	7.3	2	220	-7.6	-48	14.6	3.9	4.9	6.5	9.1	16	24.8	36.1	45.9	55.7	1.944	2.137	3.924	4.434	14.271	32.128	39.146	49.746	60.173
15012	10	2010-12-07	1.92838e+06	5.60387e+06	35	4.2	15.8	3.3	160	10.8	0.5	0.2	0.2	39	0.08	0.13	0.9	0.1	1.3	7.8	0.3	287	-7.6	-48	14.2	52.9	55	58.6	64.6	76.5	83.6	91.6	99.9	101.5	19.912	23.621	27.596	34.879	42.073	54.075	64.557	79.541	88.015
15012	10	2011-06-07	1.92838e+06	5.60387e+06	31	4	16	3.3	157	10.3	0.5	0.2	0.2	37	0.08	0.13	0.9	0	1.3	7.9	0.8	286	-7.6	-48	14	40.7	43.8	55.9	63.1	75.2	80.3	86.9	98.4	99.5	20.037	22.733	28.005	35.382	43.492	54.331	65.135	79.54	88.038
15012	10	2011-09-27	1.92838e+06	5.60387e+06	35	4.9	16.4	3.5	160	10.9	0.5	0.2	0.3	38	0.08	0.13	0.9	0	1.3	7.7	0.2	280	-7.6	-48	13.9	56.1	57.8	58.5	64.4	77.5	82.6	92.7	99.8	102.2	21.598	28.347	31.433	37.781	42.671	54.066	64.589	78.936	88.024
15012	10	2011-12-06	1.92838e+06	5.60387e+06	36	4.2	16.2	3.4	159	10.5	0.5	0.2	0.2	39	0.08	0.13	0.9	0	1.4	7.8	0.7	280	-7.6	-48	14.1	43.3	46.2	54.1	64	75.7	79.2	88.2	98.6	99.1	21.558	27.321	27.453	35.404	42.587	54.223	65.167	79.567	88.064
15012	10	2012-03-06	1.92838e+06	5.60387e+06	33	3.5	14.1	3	160	11.2	0.5	0.1	0.2	37	0.08	0.13	0.9	0	1.4	7.8	0.3	276	-7.6	-48	14.1	51	53.8	58.8	63.7	76	79.8	92.1	100.2	102.5	19.866	23.597	27.671	35.492	42.541	54.073	64.557	79.54	88.05
15012	10	2012-06-19	1.92838e+06	5.60387e+06	34	4	15.7	3.2	160	11.2	0.5	0.2	0.2	38	0.08	0.13	0.9	0	1.4	7.8	0.2	283	-7.6	-48	13.9	55.6	57.5	60.5	63.9	76.9	82.3	93.2	100.7	102.6	19.869	23.593	27.596	35.492	42.671	54.066	64.557	79.536	88.024
15012	10	2014-06-18	1.92838e+06	5.60387e+06	34	4.1	15.9	3.5	159	10.6	0.5	0.2	0.2	38	0.08	0.13	1	0.4	1.3	7.7	0.1	281	-7.6	-48	14	63.3	64.1	64.8	68.7	78.4	84	90.2	96.6	98.5	24.112	28.375	31.433	37.606	42.203	54.067	64.589	78.935	87.985
15012	10	2014-09-10	1.92838e+06	5.60387e+06	34	4	18.1	3.2	159	10.2	0.5	0.2	0.3	38	0.08	0.13	0.9	0.2	1.4	7.7	0.2	283	-7.6	-48	14	55.5	57.9	61.5	64.8	77.4	84	92.4	99.9	101.9	19.885	24.09	27.596	34.882	42.203	54.074	64.557	79.534	87.985
15012	10	2015-03-06	1.92838e+06	5.60387e+06	34	4.2	17.1	3.7	160	10.2	0.5	0.2	0.2	37	0.08	0.13	0.9	0	1.3	7.7	0.1	281	-7.6	-48	14.2	65.1	64.2	65	65.3	77.2	81.8	92.4	99.4	101.3	24.141	28.351	31.433	37.609	42.541	54.058	64.589	78.934	88.055
15012	10	2015-09-08	1.92838e+06	5.60387e+06	34	4.1	16.7	3.3	158	10.3	0.5	0.2	0.2	37	0.08	0.13	0.9	0	1.3	7.7	0.2	282	-7.6	-48	14	54.9	56.5	59.5	62.8	76.2	81.4	92.1	99.7	101.6	19.869	24.068	27.596	35.492	42.671	54.066	64.557	79.536	88.024
15012	10	2016-03-08	1.92838e+06	5.60387e+06	33	3.8	16	3.5	159	10.3	0.5	0.2	0.2	38	0.08	0.13	0.9	0	1.5	7.7	0.2	287	-7.6	-48	14.2	56.4	57.7	60.3	62.3	76.9	80.5	92.6	99.9	101.9	21.62	28.351	31.433	37.783	42.541	54.066	64.589	78.938	88.055
15012	10	2016-06-07	1.92838e+06	5.60387e+06	36	4.1	16.5	3.4	160	10.1	0.5	0.2	0.2	39	0.08	0.13	0.9	0	1.2	7.7	0.3	288	-7.6	-48	14	51.6	53.8	57.8	62.5	76	82.3	92.7	100.5	102.7	21.611	28.353	31.433	37.782	42.671	54.066	64.589	78.942	88.024
15012	10	2016-12-06	1.92838e+06	5.60387e+06	33	4	16.1	3.2	159	10.5	0.5	0.2	0.2	36	0.08	0.13	0.9	0	1.3	7.8	0.1	283	-7.6	-48	14.1	64.6	64.4	66.4	65.2	76.5	82.3	90.4	96.7	98.2	22.885	28.348	31.433	37.76	42.541	54.057	64.557	78.908	88.05
15012	10	2017-03-07	1.92838e+06	5.60387e+06	33	3.8	15.7	3.6	158	10.4	0.5	0.2	0.2	38	0.08	0.13	0.9	0.2	1.4	7.6	0	279	-7.6	-48	14.2	73.7	72.8	70.6	69.5	79.4	85.4	91.3	96.9	99.9	24.706	28.372	31.433	37.596	42.093	54.066	64.589	78.935	88.015
15012	10	2018-06-13	1.92838e+06	5.60387e+06	33	3.9	16.5	3.5	156	10.8	0.5	0.2	0.2	40	0.08	0.13	0.9	0.1	1.3	7.7	0.1	277	-7.6	-48	14	68.5	67.7	67.4	69.1	78.5	84.9	92	97.9	99.9	24.112	28.372	31.433	37.607	42.203	54.172	64.589	78.935	87.985
15012	10	2018-12-04	1.92838e+06	5.60387e+06	35	4.4	15.8	3.5	154	10.7	0.5	0.2	0.2	40	0.08	0.13	0.9	0	1.4	7.7	0.1	285	-7.6	-48	14.3	67.7	66.6	65.5	67.3	76.9	82.3	91.4	98	100.5	24.15	28.353	31.433	37.609	42.541	54.164	64.589	78.934	88.055
15012	10	2019-03-05	1.92838e+06	5.60387e+06	34	4	16.7	3.5	155	10.6	0.5	0.2	0.2	39	0.08	0.13	0.9	0	1.3	7.8	0.1	282	-7.6	-48	14.1	63.2	63	64	65.4	76.7	83	91.9	98.1	100.6	24.146	28.351	31.433	37.608	42.541	54.164	64.589	78.934	88.05
15012	10	2019-06-04	1.92838e+06	5.60387e+06	36	4.2	16.5	3.5	158	10.5	0.5	0.2	0.2	39	0.08	0.13	0.9	0	1.4	7.7	0.1	268	-7.6	-48	14	62	62.3	63.1	65.7	76.8	83.3	92.7	99.1	101.5	24.15	28.351	31.433	37.608	42.671	54.058	64.589	78.934	88.024
15012	10	2019-09-17	1.92838e+06	5.60387e+06	33	4	16.2	3.5	154	10.6	0.5	0.2	0.2	37	0.08	0.13	0.9	0	1.3	7.7	0.1	272	-7.6	-48	14.1	63.6	63	64.5	65.2	76.5	82.6	91.4	97.5	99.8	24.15	28.349	31.433	37.608	42.541	54.163	64.589	78.934	88.05
15012	10	2019-12-18	1.92838e+06	5.60387e+06	36	4.4	17.3	3.6	154	10.9	0.5	0.2	0.2	40	0.08	0.13	0.9	0.2	1.4	7.6	-0.3	281	-7.6	-48	14	25.7	27.6	56.8	58.6	77	77.3	84.2	90.2	89.1	24.706	28.374	31.433	37.596	42.222	54.172	64.589	78.935	87.985
15012	10	2020-03-18	1.92838e+06	5.60387e+06	34	4	15.7	3.5	154	10.4	0.5	0.2	0.2	40	0.08	0.13	0.9	0.5	1.4	7.7	-0.3	268	-7.6	-48	14.1	36.4	38.6	56.8	59	74.8	76.1	80.6	88.8	87.9	24.541	28.375	31.433	37.591	42.093	54.173	64.589	78.935	88.01
15012	10	2020-06-22	1.92838e+06	5.60387e+06	35	4.3	16.5	3.6	155	10.8	0.5	0.2	0.2	40	0.08	0.13	0.9	0	1.3	7.8	0.2	279	-7.6	-48	14	55.1	57	61.6	65.9	76.7	84.1	93.1	100.2	102.6	21.619	28.353	31.433	37.781	42.671	54.173	64.589	78.938	88.024
15022	22	2010-12-07	1.93527e+06	5.6129e+06	22	3.2	9.8	1.5	91	6.1	6.7	0.1	0	23	0.08	0.13	0.1	0	0.1	8	0.3	179	-7.6	-48	14.4	12.8	17.8	18.9	29.3	31.3	34.3	40.9	49.3	56.3	29.128	32.188	34.051	34.622	41.974	54.895	64.244	78.708	87.921
15022	22	2011-03-07	1.93527e+06	5.6129e+06	22	3.4	9.6	1.5	90	6	7.2	0.1	0	20	0.08	0.13	0.1	0	0.1	8.1	0.2	178	-7.6	-48	14.4	18.3	20.6	20.3	27.3	32.1	33.1	41.8	51	57.4	28.946	32.188	30.915	34.884	42.473	55.104	63.592	71.2	77.19
15022	22	2011-06-07	1.93527e+06	5.6129e+06	19.8	2.9	9.7	1.4	89	6	6.5	0.1	0	21	0.08	0.13	0.1	0	0.1	8.1	0.8	178	-7.6	-48	14.2	7.3	10.3	16.3	26.8	32.9	37.9	49.5	57.2	65.4	28.754	31.114	34.856	35.038	45.279	55.365	64.822	78.506	87.935
15022	22	2011-10-03	1.93527e+06	5.6129e+06	21	3.3	9.7	1.5	91	6.1	6.3	0.1	0	23	0.08	0.13	0.1	0	0.1	7.9	0.3	177	-7.6	-48	14.1	12.6	17	19.2	27.5	32	34.7	43.8	51.4	58.3	28.994	32.196	34.046	34.62	42.104	55.021	64.244	78.708	87.927
15022	22	2011-12-08	1.93527e+06	5.6129e+06	22	3.4	10.9	1.7	90	6.3	7.5	0.1	0.1	22	0.08	0.13	0.1	0	0.1	8.2	0.2	175	-7.6	-48	14.5	18.7	22	20.9	30.4	33.1	33.6	43.1	51.1	56.6	31.424	32.201	32.997	34.638	41.602	54.945	64.315	79.189	87.994
15022	22	2012-09-25	1.93527e+06	5.6129e+06	21	3.1	9.8	1.6	91	6.3	6.8	0.1	0	22	0.08	0.13	0.1	0	0.1	8.1	0.2	178	-7.6	-48	14.1	14.2	18.6	19.1	29.1	33.1	34.1	44.7	52.3	59.3	28.997	32.196	34.051	34.672	41.974	55.087	64.244	78.703	87.916
15022	22	2012-12-12	1.93527e+06	5.6129e+06	22	3.3	9.8	1.7	91	6.8	7	0.1	0	21	0.08	0.13	0.1	0	0.1	8.1	0.2	178	-7.6	-48	14.3	16.9	20.1	19.5	27.9	31.9	33.3	43.9	54.5	60.2	32.868	32.196	34.067	34.685	41.902	54.808	64.244	78.896	87.902
15022	22	2013-08-19	1.93527e+06	5.6129e+06	21	3.1	10	1.6	90	6.3	6.7	0.1	0	22	0.08	0.13	0.1	0	0.1	8	0.5	180	-7.6	-48	14.2	9	10.5	17.2	27	32.7	37.1	46.5	55.5	62.5	29.002	31.114	33.836	34.68	42.026	55.255	64.822	78.799	87.993
15022	22	2013-12-11	1.93527e+06	5.6129e+06	22	3.4	10.8	1.7	92	5.9	6.7	0.1	0	23	0.08	0.13	0.1	0.2	0.1	8	0.3	177	-7.6	-48	14.1	12.9	17.4	20.2	29.1	34.6	37.4	44.2	53.5	59.7	32.855	32.198	34.046	34.635	41.506	54.9	64.244	79.149	87.883
15022	22	2014-03-11	1.93527e+06	5.6129e+06	21	2.9	10.3	1.7	91	6.2	6.7	0.1	0	23	0.08	0.13	0.1	0.1	0.1	8.1	0.3	178	-7.6	-48	14.5	11	17	17.7	27.9	28.9	32.4	39.2	47.3	54.9	32.675	32.185	34.451	35.009	42.853	55.024	64.244	79.148	87.955
15022	22	2014-06-19	1.93527e+06	5.6129e+06	21	3.2	9.7	1.7	91	6	7.1	0.1	0	22	0.08	0.13	0.1	0.1	0.1	8	0.1	176	-7.6	-48	14.2	24.7	24.9	27.4	34	35	38	45.4	51.2	58.9	38.947	45.469	40.612	46.539	46.624	55.104	62.509	69.598	77.088
15022	22	2014-09-11	1.93527e+06	5.6129e+06	21	3.2	10.3	1.5	90	5.5	6.7	0.1	0	23	0.08	0.13	0.1	1	0.1	8	0.2	178	-7.6	-48	14	13.1	17.7	23.5	31.7	34.4	37.9	42.7	51.7	56.9	29.006	32.2	34.051	34.633	41.636	55.029	64.397	78.989	87.901
15022	22	2014-12-03	1.93527e+06	5.6129e+06	21	3.3	11	1.7	91	5.8	6.7	0.1	0	23	0.08	0.13	0.1	0	0.1	8.1	0.2	179	-7.6	-48	14	17.6	20.5	24	30.1	36	36.4	43.7	51.7	56.5	32.648	32.196	34.051	34.673	42.104	55.021	64.244	79.145	87.956
15022	22	2015-03-04	1.93527e+06	5.6129e+06	21	3.1	10.7	1.7	91	5.5	6.5	0.1	0	22	0.08	0.13	0.1	0	0.1	8.1	0.1	177	-7.6	-48	14.3	31.8	32	27.1	31.8	36	37.2	41.9	47.6	53.5	38.862	45.432	40.606	46.581	46.803	55.097	62.509	70.067	77.079
15022	22	2015-06-17	1.93527e+06	5.6129e+06	22	3.2	11	1.7	91	5.8	7.8	0.1	0	22	0.08	0.13	0.1	0	0.1	7.8	0.3	178	-7.6	-48	14.1	11.8	18.1	18.5	28	31.9	35.2	43.4	51.3	58	32.991	32.196	34.051	34.632	42.019	54.959	64.244	79.115	87.933
15022	22	2015-09-09	1.93527e+06	5.6129e+06	23	3.6	10.5	1.6	90	6	6.8	0.1	0	24	0.08	0.13	0.1	0	0.1	8.1	0.2	178	-7.6	-48	14	16.5	20.6	20.9	28	34.7	36	46.3	55.2	62.3	28.752	32.196	34.051	34.671	42.104	54.892	64.244	78.924	87.94
15022	22	2015-12-01	1.93527e+06	5.6129e+06	21	3.2	9.1	1.6	90	6	6.2	0.1	0	22	0.08	0.13	0.1	0	0.1	8	0.2	179	-7.6	-48	14.1	14.5	18.9	19.1	30.8	31.9	35.8	43.7	52.2	59.4	29.291	32.197	34.051	34.63	42.059	55.087	64.145	78.697	87.916
15022	22	2016-03-09	1.93527e+06	5.6129e+06	22	3.4	10.1	1.6	92	6.4	6.5	0.1	0	24	0.08	0.13	0.1	0	0.1	8.1	0.2	180	-7.6	-48	14.3	16.4	19.2	22.6	27.7	32.6	33.2	43.2	52.2	59	29.108	32.196	34.051	34.68	41.974	54.628	64.244	78.95	87.979
15022	22	2016-06-08	1.93527e+06	5.6129e+06	22	3.4	10.3	1.8	91	6.2	6.3	0.1	0	23	0.08	0.13	0.1	0	0.1	8	0.2	183	-7.6	-48	14.2	18.6	21.8	20.8	29.2	33.8	34.4	42.7	52.3	58.2	20.884	24.101	28.412	33	42.281	54.926	64.415	79.4	88.049
15022	22	2016-09-27	1.93527e+06	5.6129e+06	21	3.4	9.9	1.5	90	5.8	6.6	0.1	0	22	0.08	0.13	0.1	0.1	0.1	8	0.1	180	-7.6	-48	14	19.6	21.3	23.8	32.3	35.7	39.5	47.4	55.7	61.5	37.003	32.198	37.696	46.574	46.595	55.089	63.468	69.598	77.235
15022	22	2016-12-07	1.93527e+06	5.6129e+06	22	3.2	9.6	1.5	92	6	7.2	0.1	0	21	0.08	0.13	0.1	0	0.1	8	0.2	181	-7.6	-48	14.4	19.5	21.6	20.7	29.1	32	33.9	41.5	49.8	56.6	16.748	20.188	28.412	33.762	41.981	55.105	64.454	78.869	87.969
15022	22	2017-03-08	1.93527e+06	5.6129e+06	21	3	9.4	1.5	90	6.1	6.9	0.1	0	23	0.08	0.13	0.1	0	0.1	8.1	0.1	178	-7.6	-48	14.1	19.6	21.2	20.7	28.6	33.1	36.1	43.9	52.6	59	36.9	32.197	37.69	46.657	46.595	55.012	63.369	70.031	77.165
15022	22	2017-06-29	1.93527e+06	5.6129e+06	22	3.3	10.1	1.7	90	5.7	6.9	0.1	0	22	0.08	0.13	0.1	0	0.1	8.1	0.3	177	-7.6	-48	13.9	13.4	17.9	19	28.8	35.4	37.4	44.9	52.7	59	32.849	32.189	34.046	34.672	42.104	54.958	64.244	79.149	87.889
15022	22	2017-09-06	1.93527e+06	5.6129e+06	22	3.3	9.7	1.6	90	6.3	6.9	0.1	0	25	0.08	0.13	0.1	0	0.1	8	-0.1	177	-7.6	-48	13.9	10.3	12.6	18.2	26.7	32.4	32.6	38.2	45.8	51.1	37.975	32.189	37.69	46.583	46.615	54.884	63.468	70.038	77.146
15022	22	2017-12-06	1.93527e+06	5.6129e+06	22	3.5	10.1	1.7	89	6.1	6.8	0.1	0	25	0.08	0.13	0.1	0	0.1	8	0	182	-7.6	-48	14.4	11.6	18.3	19.1	22.5	30.2	32.1	37.6	45.8	51.5	27.212	32.187	34.051	34.616	43.595	54.887	64.244	79.115	88.049
15022	22	2018-03-07	1.93527e+06	5.6129e+06	21	3.1	10	1.7	90	6.2	6.8	0.1	0	25	0.08	0.13	0.1	0	0.1	8	-0.1	179	-7.6	-48	14.3	11.5	17.3	18.9	23.9	30.6	32.3	37.7	46	50.7	39.255	45.538	40.648	46.569	46.644	55.03	62.509	70.038	77.079
15022	22	2018-06-14	1.93527e+06	5.6129e+06	22	3.4	10.4	1.7	89	6.4	6.6	0.1	0	24	0.08	0.13	0.1	0.2	0.1	7.9	0	179	-7.6	-48	13.8	11.1	17.7	20.3	26.1	34.7	34.2	39.6	50.1	52.4	43.4	45.423	40.654	46.556	47.793	54.642	62.382	69.718	77.062
15022	22	2018-09-05	1.93527e+06	5.6129e+06	21	3.4	10.5	1.6	89	6.6	6.6	0.1	0	23	0.08	0.13	0.1	0	0.1	8	0	180	-7.6	-48	13.8	45.5	44.2	36.1	37	39.9	43.3	51.7	54.2	62	42.916	45.537	40.648	46.573	47.793	54.762	62.382	70.067	76.973
15022	22	2018-12-05	1.93527e+06	5.6129e+06	22	3.3	10.7	1.7	89	6.3	6.4	0.1	0	24	0.08	0.13	0.1	0	0.1	8.1	0	182	-7.6	-48	14.3	47.2	46.4	36.6	35.3	35.9	38.6	46.1	48.3	55.9	27.339	32.196	34.051	34.656	43.68	54.887	64.244	79.14	88.049
15022	22	2019-03-06	1.93527e+06	5.6129e+06	22	3.1	10.6	1.6	90	6.3	6.4	0.1	0	24	0.08	0.13	0.1	0	0.1	8	0.1	180	-7.6	-48	14	31.9	32.5	31	36.3	36.9	39.7	44.9	50.1	57.7	37.442	32.196	37.69	46.592	46.774	54.885	63.468	70.067	77.204
15022	22	2019-06-05	1.93527e+06	5.6129e+06	23	3.3	9.2	1.6	92	6.3	6	0.1	0	22	0.08	0.13	0.1	0	0.1	8	0.3	180	-7.6	-48	13.8	13.2	17.9	18.7	30.2	35.1	37.8	46.6	54.1	60.9	34.289	32.19	34.051	34.626	42.189	54.958	64.145	78.7	87.697
15022	22	2019-09-18	1.93527e+06	5.6129e+06	22	3.2	9.9	1.7	91	6.5	6.1	0.1	0	21	0.08	0.13	0.1	0	0.1	8	0.1	186	-7.6	-48	13.9	33.9	33.6	30.8	36.2	38	40.3	44.6	50	57.1	26.995	32.188	34.051	34.639	42.69	54.797	64.244	78.985	87.953
15022	22	2019-12-18	1.93527e+06	5.6129e+06	23	3.5	10.2	1.7	89	6.6	6.7	0.1	0	24	0.08	0.13	0.1	0	0.1	8.1	0.1	176	-7.6	-48	14	37.6	38.2	31	36.4	38.4	41.1	47.3	53.2	60.2	38.69	45.177	40.648	46.603	47.778	54.632	62.509	70.041	77.17
15022	22	2020-03-18	1.93527e+06	5.6129e+06	20	3	9.8	1.6	93	6.2	6.7	0.1	0	25	0.08	0.13	0.1	1	0.1	8.1	0.8	175	-7.6	-48	14.2	7.2	9	18	30.8	32.7	38.1	49.6	59.3	68.2	28.743	31.123	34.42	34.779	42.389	55.2	64.975	78.744	87.896
15022	22	2020-06-22	1.93527e+06	5.6129e+06	23	3.5	10.4	1.7	91	6.2	6.5	0.1	0	25	0.08	0.13	0.1	0	0.1	8.1	0.2	178	-7.6	-48	14.1	17.1	19.6	23.6	29.5	34.3	35.7	44.4	53.7	60.1	32.167	32.196	34.051	34.671	41.974	54.892	64.244	79.117	87.989
15465	7	2017-03-07	1.92414e+06	5.60275e+06	38	9.6	35	5.1	210	42	0.5	3.3	0.7	44	0.08	0.13	0.2	0	1.8	7	0.2	461	-7.6	-48	16.6	23.5	25.6	48.3	37.2	46.1	53.8	65.8	76.5	82.9	11.354	14.86	28.664	36.005	45.761	53.66	64.735	79.391	87.9
15465	7	2017-06-28	1.92414e+06	5.60275e+06	38	9.6	35	4.8	183	41	0.5	2.3	0.5	42	0.08	0.13	0.3	0	1	7.1	0.3	432	-7.6	-48	14.9	48	48.2	49.4	54.5	63.9	71.5	77.8	93.4	96.4	15.18	21.06	27.602	35.977	45.275	53.7	64.735	79.381	88.048
15465	7	2017-09-05	1.92414e+06	5.60275e+06	38	9.1	32	4.7	195	44	0.5	2.2	0.5	43	0.08	0.13	0.3	0	0.9	7	0	435	-7.6	-48	15.6	11	15.9	50.3	38.9	51.3	55.1	60.5	69.5	72	19.474	21.49	27.576	35.219	44.931	53.652	64.668	79.377	88.071
15465	7	2017-12-05	1.92414e+06	5.60275e+06	46	11.7	42	5.6	260	38	0.5	4	0.9	44	0.08	0.13	0	0	1.8	6.9	0	504	-7.6	-48	16.7	7.4	10.4	18.5	24.1	24.3	26.5	25.8	44.7	52	18.996	19.729	26.935	32.987	41.922	53.177	65.656	79.664	88.067
15465	7	2018-03-06	1.92414e+06	5.60275e+06	47	11.1	42	5.3	260	35	0.5	4.3	0.9	45	0.08	0.13	0	0	2	6.8	0	515	-7.6	-48	15.6	9.8	13.5	18.7	24.8	25.5	32	29.9	44.7	51.1	18.989	19.729	26.935	32.988	41.922	53.101	65.656	79.659	88.067
15465	7	2018-06-13	1.92414e+06	5.60275e+06	36	9.6	36	4.7	186	41	1	2	0.5	44	0.08	0.13	0.2	0.1	0.9	7	0	422	-7.6	-48	15.4	55.2	58.4	62.4	48.7	58.5	63.3	70.8	85.1	86.8	21.816	29.1	31.434	37.651	44.463	53.697	64.668	78.753	88.031
15465	7	2018-09-04	1.92414e+06	5.60275e+06	35	9.2	35	4.6	181	43	0.9	1.9	0.5	42	0.08	0.13	0.3	0	0.8	7	0.1	419	-7.6	-48	15.5	56.7	58.1	57.4	52.4	59.8	68	77.8	91.3	93.6	21.354	28.247	31.434	37.667	44.911	53.688	64.668	78.753	88.071
15465	7	2018-12-04	1.92414e+06	5.60275e+06	42	10.6	38	5.5	240	39	0.5	3.6	0.8	44	0.08	0.13	0.4	0	1.6	6.9	0	499	-7.6	-48	16.5	12.4	16.3	58.8	47.5	53.7	57.8	68.6	79.4	83.2	19.411	21.489	27.576	35.205	44.931	53.45	64.668	79.375	88.071
15465	7	2019-03-05	1.92414e+06	5.60275e+06	40	10.1	38	4.8	210	40	0.8	2.5	0.6	45	0.08	0.13	0.4	0	1.1	7	0.1	452	-7.6	-48	16.1	37.5	40.1	53.1	46	57.1	62.1	75.2	88.6	92	18.99	21.489	27.576	35.231	44.911	53.646	64.668	79.376	88.071
15465	7	2019-06-04	1.92414e+06	5.60275e+06	47	10.8	37	5.2	250	40	2.3	3.2	0.8	43	0.08	0.13	0.5	0	1.6	7.1	0.2	497	-7.6	-48	15.7	32.9	37.5	49.6	50.8	59.6	66.4	73.8	86.7	89.8	13.141	20.85	27.612	36.02	45.663	53.603	64.735	79.379	88.064
15465	7	2019-09-17	1.92414e+06	5.60275e+06	35	9.5	35	4.5	178	42	1.8	1.8	0.5	42	0.08	0.13	0.3	0	0.8	7.1	0.2	417	-7.6	-48	15.7	54.6	52	50.6	47.6	57	68.2	80.2	95.5	99.6	11.269	14.853	24.47	27.959	34.877	37.578	50.494	67.78	78.432
15465	7	2020-03-19	1.92414e+06	5.60275e+06	43	11.1	34	4.9	220	40	2.6	2.8	0.7	44	0.08	0.13	0.5	0.2	1.2	6.9	0.3	469	-7.6	-48	15.9	47.3	46.7	47.1	47.8	61.1	65.8	74.1	90.9	93.8	13.155	20.877	27.612	35.397	45.195	53.59	64.735	79.394	88.024
15465	7	2020-06-23	1.92414e+06	5.60275e+06	37	10.3	35	4.7	183	44	2.4	1.8	0.5	41	0.08	0.13	0.3	0	0.7	6.9	0.4	429	-7.6	-48	15.4	43.1	46.2	49.1	51.2	60	70.9	81	92.9	98.4	22.076	27.138	27.455	35.248	44.957	53.89	65.246	79.398	88.085
16202	13	2014-06-26	1.93373e+06	5.6068e+06	16.6	3.3	9.3	1.1	73	6.2	10.7	0.1	0	17.6	0.08	0.13	0	0.3	0	7.7	1.2	160	-7.6	-48	14.4	3.7	4.5	5.7	13.9	23.8	30.7	43.2	53.1	62.4	1.383	1.85	3.414	6.244	8.26	9.417	20.891	33.923	35.043
16202	13	2014-12-03	1.93373e+06	5.6068e+06	34	4.7	15.8	2.3	126	11.2	14.1	0.2	0	21	0.08	0.13	0	0.5	0	7.1	0.6	270	-7.6	-48	15.6	6.8	8.7	13.4	16.7	22.3	24.6	33.8	43.2	50.1	5.798	9.905	17.355	20.057	23.071	27.837	36.411	47.484	53.044
16202	13	2016-06-08	1.93373e+06	5.6068e+06	28	3.7	13.2	2.1	105	10.4	11.9	0.1	0	20	0.08	0.13	0	0.4	0	7.4	1.1	234	-7.6	-48	15.2	9.1	12.6	15	22.3	27.9	31.8	40.3	50.8	59.9	9.157	11.575	15.235	20.075	23.349	30.374	37.107	48.191	59.939
16202	13	2016-09-27	1.93373e+06	5.6068e+06	27	3.7	13.9	1.9	102	10.4	12	0.1	0	19.7	0.08	0.13	0	0.4	0	7.2	0.8	230	-7.6	-48	15.8	5.1	6.3	8	9.3	14.6	18.8	27.1	36.2	45.1	1.586	1.616	2.616	3.648	6.198	8.95	12.593	19.81	32.425
16202	13	2016-12-07	1.93373e+06	5.6068e+06	27	3.6	12.7	1.9	105	11.4	13.2	0.1	0	18.1	0.08	0.13	0	0.4	0	7	0.6	228	-7.6	-48	15.8	6.2	6.9	9.6	8.8	11.6	16.7	25	35.9	44.4	0.665	0.904	1.671	2.397	4.823	7.988	12.025	18.405	32.222
16202	13	2017-03-08	1.93373e+06	5.6068e+06	27	3.5	12.2	1.9	106	10.7	12.8	0.2	0	20	0.08	0.13	0	0.3	0	7.2	0.8	232	-7.6	-48	14.9	6.9	8.1	13	18.5	25.6	29.7	39.7	48.3	57.7	2.407	2.926	4.456	6.578	8.093	9.488	12.735	19.965	32.389
16202	13	2017-06-29	1.93373e+06	5.6068e+06	28	3.6	12.9	2	101	10	11.7	0.1	0	19.8	0.08	0.13	0	0.4	0	7.2	1	223	-7.6	-48	15.4	6.7	7.4	10.2	17.3	18.6	25.3	36.7	48.5	58.4	0.762	0.981	1.671	2.808	5.643	7.988	12.025	18.433	21.324
16202	13	2017-09-05	1.93373e+06	5.6068e+06	28	3.8	13.8	2.1	104	12.5	12.6	0.1	0	21	0.08	0.13	0	0.6	0	7.1	1	237	-7.6	-48	15.6	6.8	7.5	10.7	12.5	20.4	24.2	33.9	44.4	53.4	7.403	9.869	16.734	20.039	23.364	30.371	36.114	48.189	59.913
16202	13	2017-12-05	1.93373e+06	5.6068e+06	30	4.1	12.9	2.1	106	13.7	14.6	0.1	0	21	0.08	0.13	0	0.4	0	7.1	0.5	248	-7.6	-48	15.8	6.8	7.5	9.1	10.1	15.2	20	26.3	36.3	44.1	6.726	10.068	16.782	20.029	23.101	27.841	36.167	48.132	58.309
16202	13	2018-03-06	1.93373e+06	5.6068e+06	32	4.1	13.7	2	113	14.4	15	0.1	0	21	0.08	0.13	0	0.5	0	7	0.4	264	-7.6	-48	15.4	5.8	5.8	8.7	11.7	17.9	20.3	28.1	36.4	43.8	2.328	2.868	3.976	4.959	6.216	8.952	12.615	18.151	21.234
16202	13	2018-06-13	1.93373e+06	5.6068e+06	35	4.7	14.9	2.2	124	15.4	16.8	0.2	0	22	0.08	0.13	0	0.6	0	7.1	0	281	-7.6	-48	15.4	12.2	19.7	18.5	22.2	22.2	21.9	26.5	33.1	38.2	11.875	11.984	19.065	22.32	26.048	30.353	36.519	46.622	52.858
16202	13	2018-09-04	1.93373e+06	5.6068e+06	34	4.4	15.1	2.2	121	12.7	15.5	0.2	0	20	0.08	0.13	0	0.6	0	7.1	0.4	271	-7.6	-48	15.5	7.4	9.1	13.1	14.8	21.5	22.9	31.7	39.7	48.6	6.171	10.093	17.355	20.054	23.071	27.846	36.411	47.577	52.992
16202	13	2018-12-04	1.93373e+06	5.6068e+06	35	4.6	15.1	2.2	125	14.3	15.8	0.1	0	21	0.08	0.13	0	0.5	0	6.9	0.5	288	-7.6	-48	15.5	6.9	8.2	11	10.8	18.2	21.6	29	37.1	46	5.873	10.093	16.782	20.033	23.071	27.846	36.572	47.386	52.992
16202	13	2019-03-05	1.93373e+06	5.6068e+06	36	4.6	14.4	2.1	124	13.9	15.6	0.1	0	21	0.08	0.13	0	0.6	0	7	0.4	281	-7.6	-48	15.3	7.3	8.5	11.6	15.6	21.1	23	31.8	39.8	47.5	5.899	10.093	16.782	20.033	23.056	27.846	36.572	47.439	52.992
16202	13	2019-06-04	1.93373e+06	5.6068e+06	36	4.3	13.6	2.2	122	13.5	15.1	0.1	0	19.8	0.08	0.13	0	0.6	0	7.2	0.8	272	-7.6	-48	15.3	6.7	7.7	11.2	16.8	20.3	25.4	34.9	44.4	53.8	5.281	6.586	13.791	18.395	23.056	27.86	37.747	47.658	60.112
16202	13	2019-09-17	1.93373e+06	5.6068e+06	34	4.4	14.1	2.2	119	13	14.4	0.2	0	21	0.08	0.13	0	1.4	0	7.3	0.4	259	-7.6	-48	15.6	7.4	9.1	14.8	14.5	21	22.6	31.7	41.8	49.4	3.855	3.938	5.087	26.722	34.995	38.669	50.176	69.574	78.393
16202	13	2019-12-19	1.93373e+06	5.6068e+06	35	4.6	14.2	2.2	122	12.2	13.9	0.3	0	21	0.08	0.13	0	0.5	0	7	0.6	268	-7.6	-48	15.7	6.7	7.4	11.4	14	19.9	22.2	33.8	42.5	51.4	5.901	9.974	17.355	20.246	23.071	27.845	36.411	47.484	53.044
16202	13	2020-03-18	1.93373e+06	5.6068e+06	33	4.5	14.1	2.1	125	12.4	13.7	0.4	0	22	0.08	0.13	0	0.4	0	7	0.7	260	-7.6	-48	15.2	7	7.8	13.3	16.8	23.8	26.1	39.6	48.7	58	6.061	9.89	17.339	20.248	23.056	27.877	36.411	47.622	59.913
16202	13	2020-06-22	1.93373e+06	5.6068e+06	32	4.3	13.6	2.1	118	12.4	13.6	0.2	0	21	0.08	0.13	0	0.4	0	7.2	0.7	260	-7.6	-48	15.4	6.6	7.8	11.6	15.4	21	24.3	35.5	44.7	53.8	5.868	9.888	17.355	20.058	23.056	27.877	36.167	47.622	59.935
16203	14	2014-12-03	1.93373e+06	5.6068e+06	17.5	3.7	10.1	1.3	73	6	9.8	0	0	18.2	0.08	0.13	0	0.2	0	7.6	1.1	162	-7.6	-48	14.4	3.7	4.6	5.5	14.9	23.3	34.8	45.3	54.9	65.9	2.343	2.823	4.976	40.133	43.325	56.835	66.1	77.975	87.818
16203	14	2016-06-08	1.93373e+06	5.6068e+06	17.7	3.6	9.7	1.2	74	6.1	9.9	0.1	0	17.5	0.08	0.13	0	0.2	0	7.9	1.1	164	-7.6	-48	14.4	3.7	4.5	5.7	18.1	25.4	31.4	47.6	58.4	68.4	1.559	1.909	4.003	7.645	13.099	27.05	37.562	47.635	59.68
16203	14	2016-09-27	1.93373e+06	5.6068e+06	16.5	3.5	9.3	1.1	72	6.3	10	0	0	17.6	0.08	0.13	0	0.2	0	7.7	0.9	162	-7.6	-48	14.3	4.1	4.9	5.9	13.5	22.7	31.3	45.7	55.9	66.6	1.517	1.731	3.47	9.301	12.156	29.092	31.189	39.79	49.669
16203	14	2016-12-07	1.93373e+06	5.6068e+06	17.1	3.5	9.3	1.1	72	6.6	10.9	0.1	0	16.2	0.08	0.13	0	0.2	0	7.4	0.9	162	-7.6	-48	14.6	3.5	4.2	4.9	11.4	20.5	25.4	43.9	56.3	67	1.429	1.707	2.581	2.756	5.821	8.059	19.902	33.662	34.551
16203	14	2017-06-29	1.93373e+06	5.6068e+06	17.9	3.6	9.8	1.3	72	6	10.4	0	0	17.5	0.08	0.13	0	0.1	0	7.6	0.9	160	-7.6	-48	14.3	4	4.8	5.8	17	23.8	32.6	46.2	56.3	67.1	1.022	1.405	2.882	8.513	11.404	9.416	20.254	33.848	34.872
16203	14	2017-09-05	1.93373e+06	5.6068e+06	17.8	3.6	10.2	1.2	72	6.9	10.3	0	0	18.6	0.08	0.13	0	0.2	0	7.6	0.7	161	-7.6	-48	14.3	4	4.8	5.6	14.5	22.1	28.2	44.3	55.5	66.6	1.116	1.323	2.595	7.903	10.683	9.425	12.879	20.105	32.586
16203	14	2017-12-05	1.93373e+06	5.6068e+06	17.2	3.6	9.4	1.3	72	6.4	10.2	0.1	0	18.5	0.08	0.13	0	0.2	0	7.3	0.8	163	-7.6	-48	14.8	3.8	4.5	5.2	11.2	15.4	23.4	40.5	53.2	65	0.467	0.994	1.651	2.249	4.126	5.051	16.757	23.975	32.751
16203	14	2018-03-06	1.93373e+06	5.6068e+06	17.3	3.5	9.5	1.2	72	6.8	9.9	0.1	0	18.2	0.08	0.13	0	0.2	0	7.5	1.1	161	-7.6	-48	14.7	3.6	4.4	5.4	11.8	23.9	25.9	42.5	54.6	65.7	1.792	2.302	3.076	3.797	5.284	8.636	12.272	19.858	32.516
16203	14	2018-06-13	1.93373e+06	5.6068e+06	18.1	3.6	9.7	1.2	72	7	10.6	0.1	0	18.5	0.08	0.13	0	0.2	0	7.6	0.9	162	-7.6	-48	14.2	3.6	4.5	5.9	14.8	23.3	32.2	46.5	55.8	67.2	1.522	1.774	3.176	8.204	11.845	9.415	13.07	20.211	32.782
16203	14	2018-09-04	1.93373e+06	5.6068e+06	17.2	3.3	10	1.2	71	6.4	10	0	0	18.4	0.08	0.13	0	0.2	0	7.6	0.9	160	-7.6	-48	14.1	4.3	5.2	5.8	15.2	23.7	34.7	46.6	56.9	66.2	1.468	1.643	3.302	9.104	10.683	9.425	20.254	33.649	35.036
16203	14	2019-03-05	1.93373e+06	5.6068e+06	17.6	3.5	9.8	1.2	72	6.8	10.3	0	0	17.8	0.08	0.13	0	0.2	0	7.6	0.9	164	-7.6	-48	15	3.3	3.7	3.3	6.7	15.8	19.3	39.8	48.4	59.9	0.522	0.834	1.552	2.134	4.643	8.034	10.546	18.441	32.17
16203	14	2019-06-04	1.93373e+06	5.6068e+06	18.5	3.4	9.1	1.2	74	6.7	10.2	0.1	0	17.9	0.08	0.13	0	0.1	0	7.6	0.9	159	-7.6	-48	14.2	4	4.9	5.7	14.3	24	30.6	45.7	56.7	66.9	1.621	2.356	3.978	9.99	11.913	27.534	25.767	33.93	35.181
16203	14	2019-09-17	1.93373e+06	5.6068e+06	17.6	3.5	9.4	1.2	72	6.7	9.6	0.2	0	17.9	0.08	0.13	0	0.1	0	7.7	1	156	-7.6	-48	14.2	3.4	4.1	5.1	20	29.6	32.9	48.4	59.5	68.6	1.731	2.375	4.533	13.729	25.218	30.606	37.707	46.955	54.666
16203	14	2019-12-19	1.93373e+06	5.6068e+06	18.3	3.7	9.4	1.2	72	6.9	10.2	0	0	18.9	0.08	0.13	0	2.4	0	7.6	1.1	159	-7.6	-48	14.4	5.1	7	8.3	18.7	21.6	27.6	41.7	53.2	63.3	4.076	3.563	5.758	22.608	24.814	31.119	37.538	46.462	54.591
16203	14	2020-06-22	1.93373e+06	5.6068e+06	17.6	3.6	9.9	1.2	72	6.6	10.1	0	0	18	0.08	0.13	0	0.1	0	7.6	0.9	161	-7.6	-48	14.5	3.9	4.8	5.5	11.9	21.2	26.6	43.2	53.7	65	1.204	1.576	2.581	4.993	5.878	8.713	19.751	33.62	34.769
16360	16	2017-03-07	1.92483e+06	5.61062e+06	16.9	2.6	8.3	1	68	6.7	8.7	0	0	18.3	0.08	0.13	0	0.2	0	7.5	6	151	-7.6	-48	15.4	1.5	1.4	1.3	2.2	1.8	3.5	5.5	7.5	9.9	0.932	1.114	1.736	2.162	4.34	4.695	15.487	31.601	33.64
16360	16	2017-06-28	1.92483e+06	5.61062e+06	17.7	2.8	9.4	1.1	69	6.4	9.2	0	0	17.4	0.08	0.13	0	0.2	0	7.6	5.8	154	-7.6	-48	15.1	1.8	1.7	2	3	4.4	6.1	8.5	13.6	18.4	0.947	1.116	1.828	2.342	4.571	4.646	16.923	31.85	33.92
16360	16	2017-09-05	1.92483e+06	5.61062e+06	17.6	2.8	8.3	1.1	68	7.2	9	0	0	18.1	0.08	0.13	0	0.2	0	7.5	5.9	154	-7.6	-48	14.8	1.7	1.5	1.9	3.7	4.4	7.8	11.2	20.1	25.9	1.088	1.168	1.736	2.197	4.381	4.637	6.884	31.633	33.299
16360	16	2017-12-05	1.92483e+06	5.61062e+06	17.3	2.9	8.6	1.1	67	7.1	9.2	0	0	18.5	0.08	0.13	0	0.2	0	7.5	5.8	154	-7.6	-48	15.2	1.6	1.5	1.5	2.7	2.8	5.1	8.1	12.9	17.6	1.08	1.125	1.736	2.18	4.381	4.642	6.884	31.442	33.402
16360	16	2018-03-06	1.92483e+06	5.61062e+06	17.3	2.8	8.8	1	68	7.3	8.6	0	0	18.2	0.08	0.13	0	0.2	0	7.4	7.2	153	-7.6	-48	15	1.6	1.6	1.7	2.9	3.2	6.5	10.1	17.7	23.7	1.054	1.125	1.736	2.187	4.082	4.674	15.487	31.614	33.844
16360	16	2018-06-13	1.92483e+06	5.61062e+06	17.3	2.8	9	1.1	68	7.4	9.3	0	0	18.8	0.08	0.13	0	0.6	0	7.5	5.9	152	-7.6	-48	15	1.7	1.6	1.5	3	3.1	5.7	7.5	12	15.3	1.095	1.134	1.768	2.153	4.396	4.64	15.487	31.496	33.974
16360	16	2018-09-04	1.92483e+06	5.61062e+06	17.4	2.7	9	1.1	66	6.8	9	0	0	17.4	0.08	0.13	0	0.2	0	7.5	5.9	151	-7.6	-48	14.7	1.9	1.8	1.9	5.5	5.6	10.3	14.1	22.2	28.4	1.629	2.128	2.968	3.709	6.142	8.442	19.907	33.776	34.707
16360	16	2018-12-04	1.92483e+06	5.61062e+06	17.7	2.7	8.6	1.1	67	7	8.4	0	0	18.3	0.08	0.13	0	0.2	0	7.6	5.8	158	-7.6	-48	15.1	1.7	1.6	1.7	3	3.5	6.2	9.7	15.8	21.7	1.048	1.121	1.736	2.235	4.381	4.726	6.952	23.167	32.148
16360	16	2019-03-05	1.92483e+06	5.61062e+06	17.9	2.7	9.1	1.1	67	7	8.9	0	0	17.6	0.08	0.13	0	0.2	0	7.7	5.7	153	-7.6	-48	15	1.5	1.4	1.6	2.9	3.7	5.9	8.1	12.2	17.3	1.017	1.149	1.754	2.192	4.381	4.643	15.554	31.861	33.99
16360	16	2019-06-04	1.92483e+06	5.61062e+06	17.9	2.7	8.2	1	69	6.6	8.7	0	0	16.7	0.08	0.13	0	0.2	0	7.7	5.7	151	-7.6	-48	15	1.8	1.6	1.8	3.1	4.3	6.9	9.9	16.6	23.9	1.135	1.135	1.846	2.394	4.571	4.744	25.525	33.641	33.96
16360	16	2019-09-17	1.92483e+06	5.61062e+06	17.4	2.8	8.7	1	66	6.6	8	0	0	17.2	0.08	0.13	0	0.2	0	7.6	5.5	146	-7.6	-48	15.1	1.6	1.5	1.6	2.8	3.1	4.9	9.8	16.9	21.5	1.065	1.113	1.828	2.341	4.571	4.742	25.525	33.63	34.033
16360	16	2019-12-19	1.92483e+06	5.61062e+06	18.1	2.9	8.8	1.1	67	6.9	8.8	0	0	18.6	0.08	0.13	0	2.1	0	7.6	5.8	149	-7.6	-48	14.9	2.2	2.5	3.3	4	5.6	7.5	10.7	15.3	21.3	0.949	1.189	1.859	2.375	6.517	7.907	20.032	33.286	34.596
16360	16	2020-03-19	1.92483e+06	5.61062e+06	18	3.1	8.6	1	70	6.6	9	0	0	19.8	0.08	0.13	0	1.4	0	7.5	5.7	150	-7.6	-48	15.3	1.7	1.7	1.7	2.2	2.4	3.7	5.8	10.7	14.5	0.823	0.872	1.537	2.544	4.433	4.651	25.457	34.745	43.008
16360	16	2020-06-23	1.92483e+06	5.61062e+06	18.1	2.9	8.7	1.1	70	6.8	8.7	0	0	17.6	0.08	0.13	0	0.2	0	7.1	5.8	150	-7.6	-48	15.1	1.6	1.7	1.6	2.8	2.6	6	10.8	18.1	24.4	0.975	1.117	1.736	2.255	4.052	4.737	15.584	24.144	32.616
16361	17	2017-03-07	1.92483e+06	5.61062e+06	17.4	2.4	7.9	1.2	66	6.9	9.2	0	0	18.5	0.08	0.13	0.1	0.2	0	7	6.6	153	-7.6	-48	15.5	3.7	5.1	7.2	9.6	15.4	25.4	39	54	64.2	7.755	11.427	15.421	17.499	23.412	30.095	34.269	44.265	51.552
16361	17	2017-06-28	1.92483e+06	5.61062e+06	19.3	2.7	8.8	1.2	71	7	9.8	0	0	18.2	0.08	0.13	0	0.2	0	7.5	5.8	160	-7.6	-48	15.3	1.7	1.7	2.1	2.7	3.6	4.3	4.6	5.8	8.1	0.756	0.816	1.445	1.574	3.281	4.31	6.325	31.594	33.375
16361	17	2017-09-05	1.92483e+06	5.61062e+06	19.7	2.8	8.1	1.2	71	7.9	10.2	0	0	19.4	0.08	0.13	0	0.2	0	7.3	5.2	163	-7.6	-48	15.3	1.7	1.7	1.6	2.3	3.2	4.3	6.1	9.5	12.4	0.658	0.854	1.445	1.926	4.08	4.674	6.383	31.498	33.221
16361	17	2017-12-05	1.92483e+06	5.61062e+06	18.6	2.8	8.6	1.3	69	7.2	10	0	0	20	0.08	0.13	0	0.3	0	7.2	5.8	160	-7.6	-48	15.8	1.4	1.6	1.4	2.4	1.2	2	3.1	3.6	5.2	2.076	2.076	2.961	4.245	5.374	8.239	12.106	17.683	32.415
16361	17	2018-06-13	1.92483e+06	5.61062e+06	17.6	2.6	8.3	1.2	68	7	9.5	0	0	21	0.08	0.13	0	0.2	0	7.2	5.8	152	-7.6	-48	15.1	1.8	1.7	1.8	3.4	3.7	5.5	8.6	14.3	18.8	2.112	2.605	2.929	4.162	5.313	8.172	19.151	24	32.862
16361	17	2018-09-04	1.92483e+06	5.61062e+06	17.8	2.5	8.8	1.2	68	6.2	9	0	0	18.6	0.08	0.13	0	0.3	0	7.3	5.3	152	-7.6	-48	15	2.1	2.1	2.5	3.9	5.1	7.8	10.4	14.8	20.7	0.99	1.221	2.016	2.381	4.602	7.558	26.167	36.374	43.898
16361	17	2018-12-04	1.92483e+06	5.61062e+06	18.6	2.6	8.6	1.2	69	6.3	8.5	0	0	19.7	0.08	0.13	0	0.3	0	7.5	5.4	155	-7.6	-48	15.5	1.7	1.8	1.7	2.5	3.1	4.2	4.9	7.9	10.3	0.819	0.952	1.725	2.604	4.545	4.724	16.379	23.605	32.601
16361	17	2019-03-05	1.92483e+06	5.61062e+06	18.5	2.5	8.6	1.2	68	6.4	9.4	0	0	18.8	0.08	0.13	0	0.3	0	7.3	5.9	154	-7.6	-48	15.3	1.4	1.5	1.3	2.3	2.1	4.1	1.9	1.4	2.5	0.857	0.814	1.537	2.129	4.498	4.643	16.379	31.534	34.475
16361	17	2019-06-04	1.92483e+06	5.61062e+06	19.7	2.6	8.1	1.2	70	6.3	9.1	0	0	17.7	0.08	0.13	0	0.2	0	7.4	5.7	152	-7.6	-48	14.9	1.8	1.8	2	3.8	4	6.9	6.3	10.8	14.3	1.228	1.556	2.68	3.056	5.469	7.557	26.085	36.556	43.337
16361	17	2019-09-17	1.92483e+06	5.61062e+06	18.8	2.6	8.4	1.2	70	7.2	8.9	0	0	18.6	0.08	0.13	0	0.7	0	7.3	5.7	156	-7.6	-48	15.3	1.7	1.8	2.2	2.9	3.2	4.4	3.1	4.2	5.6	0.856	0.811	1.477	1.594	3.296	4.336	6.325	31.569	33.286
16361	17	2019-12-19	1.92483e+06	5.61062e+06	19.5	2.8	8.6	1.2	70	7.1	9.5	0	0	19	0.08	0.13	0	0.3	0	7.4	6.1	156	-7.6	-48	15.6	1.3	1.4	1.3	2.3	1.6	2.6	1.7	1.3	1.9	0.752	0.806	1.477	1.602	3.24	4.303	6.296	31.394	33.421
16361	17	2020-03-19	1.92483e+06	5.61062e+06	17.6	2.5	8.7	1.3	69	6.5	9.3	0	0	20	0.08	0.13	0	0.2	0	7.4	6.2	150	-7.6	-48	15.4	1.5	1.5	1.4	2.1	2.7	3.5	2.1	2.4	3.7	2.612	2.615	3.036	4.21	5.46	8.128	26.509	36.22	43.74
16361	17	2020-06-23	1.92483e+06	5.61062e+06	18.8	2.7	8.6	1.2	68	7.8	9	0	0	19.3	0.08	0.13	0	0.2	0	7.1	6.1	153	-7.6	-48	15.1	1.7	1.6	1.8	2.6	3.5	4.9	4.2	6	9	0.966	1.178	1.736	2.589	4.061	4.605	15.056	31.536	33.921
16611	80	2018-03-07	1.93477e+06	5.60413e+06	21	3.4	11.4	1.4	92	7.4	7.5	0.1	0.1	22	0.08	0.13	0.1	0	0.1	7.8	0	188	-7.6	-48	14.9	12.3	17.9	19.8	24.6	29.6	32.7	40.1	47.5	54.8	23.601	31.076	31.159	34.689	42.388	54.756	64.565	79.193	88.077
16611	80	2018-06-14	1.93477e+06	5.60413e+06	22	3.4	11.7	1.4	92	8.1	6.7	0	0.1	21	0.08	0.13	0.1	0	0.1	7.8	0	190	-7.6	-48	14.7	49.4	48	38.3	32.7	34.5	39.4	48.7	51.1	60.5	24.617	31.066	31.165	34.498	42.316	54.582	64.382	79.231	88.07
16611	80	2018-09-05	1.93477e+06	5.60413e+06	21	3.5	11.6	1.4	91	8	6.8	0.1	0.1	19.6	0.08	0.13	0.1	0.1	0.1	7.8	0	188	-7.6	-48	14.2	11.5	16.2	17.8	20.5	32.5	36.5	37.5	45.3	49.5	23.726	31.092	28.247	32.217	42.493	54.725	63.762	70.19	77.43
16611	80	2018-12-05	1.93477e+06	5.60413e+06	23	3.6	11.2	1.5	90	7.9	6.7	0.1	0.1	21	0.08	0.13	0.1	0	0.1	7.8	0	190	-7.6	-48	15	15.2	19.7	21.9	24.2	29.7	33.5	41.2	46.9	54.5	23.347	31.073	31.128	34.69	42.316	54.838	64.565	79.245	88.077
16611	80	2019-03-06	1.93477e+06	5.60413e+06	22	3.4	11.6	1.4	92	7.9	6.7	0.1	0.1	21	0.08	0.13	0.1	0	0.1	7.8	0.1	189	-7.6	-48	15	29.7	30.8	27.7	29.2	30.9	35	45.7	52.2	61.3	23.59	31.077	31.159	34.707	42.296	54.741	64.565	79.225	88.077
16611	80	2019-06-05	1.93477e+06	5.60413e+06	23	3.3	10.8	1.4	94	8	6.8	0	0.1	20	0.08	0.13	0.1	0	0.1	7.8	0.1	188	-7.6	-48	14.5	30.3	30.7	30.1	31.7	35.1	41.4	52.7	58.4	67.5	23.312	31.071	28.184	33.017	42.99	54.833	63.658	70.772	77.498
16611	80	2019-09-18	1.93477e+06	5.60413e+06	21	3.5	11.5	1.5	89	8.2	6.8	0.1	0.1	19.5	0.08	0.13	0.1	0	0.1	7.8	0.2	188	-7.6	-48	14.7	14.8	18.7	22	26.4	30.7	36	45.9	55.3	63.1	14.594	20.427	24.222	28.116	45.018	54.718	63.996	79.071	88.07
16611	80	2019-12-18	1.93477e+06	5.60413e+06	23	3.6	11.8	1.4	91	8	7.3	0.1	0.1	21	0.08	0.13	0.1	0	0.1	7.8	0.2	179	-7.6	-48	14.4	18.3	20.5	24.7	29.4	33.2	39.1	49.1	58	65.4	26.733	32.201	33.049	34.612	41.575	54.564	64.315	78.966	88.022
16611	80	2020-03-18	1.93477e+06	5.60413e+06	21	3.2	10.8	1.3	92	6.9	6.6	0.1	0.1	21	0.08	0.13	0.1	0.3	0.1	7.7	0.2	182	-7.6	-48	14.7	12.4	16.8	22.5	27	29.8	37.3	44.2	53.9	61.7	14.827	20.928	27.257	32.78	42.162	54.981	64.624	79.118	88.031
16611	80	2020-06-22	1.93477e+06	5.60413e+06	21	3.4	10.9	1.4	91	7.9	7.4	0.1	0.1	21	0.08	0.13	0.1	0	0.1	7.6	0.2	186	-7.6	-48	14.7	14.2	18.6	21.2	24.9	30.7	37.6	49.2	58.2	67.6	15.041	20.895	27.257	33.462	43.203	54.972	64.624	79.198	88.07
16641	81	2018-03-06	1.93039e+06	5.60604e+06	18.3	4.1	10	1.4	79	7.3	8.4	0	0	21	0.08	0.13	0	0.3	0	7.5	2.7	170	-7.6	-48	15.6	2.7	3.4	4.3	4.2	11	10.3	22	30.7	38.4	2.489	2.618	3.009	4.357	5.587	8.315	11.704	18.042	32.274
16641	81	2018-06-13	1.93039e+06	5.60604e+06	18.4	4.1	10.2	1.4	80	7.4	9.2	0	0	17.3	0.08	0.13	0	0.3	0	7.6	2.1	172	-7.6	-48	14.7	3.1	4	5.3	10.6	18.7	22.6	31.2	39	49.2	1.984	2.16	3.108	3.955	5.732	8.266	11.999	18.351	32.5
16641	81	2018-09-04	1.93039e+06	5.60604e+06	18.5	4	10.2	1.4	79	6.9	8.6	0	0	20	0.08	0.13	0	0.4	0	7.6	1.9	170	-7.6	-48	14.7	3.3	4.2	5.5	10.4	22.3	24	36.3	47.6	55.9	4.047	3.565	3.946	4.411	5.709	8.335	11.999	18.094	32.312
16641	81	2018-12-04	1.93039e+06	5.60604e+06	18.6	4.2	10	1.4	80	6.9	8	0	0	21	0.08	0.13	0	0.3	0	7.6	1.9	177	-7.6	-48	15.5	3.1	3.9	4.7	5.3	13.2	12.9	28.3	41.6	50.6	1.823	2.107	3.108	4.337	5.587	8.325	11.999	17.952	32.348
16641	81	2019-03-05	1.93039e+06	5.60604e+06	18	4	10.1	1.4	79	7	8.8	0	0	21	0.08	0.13	0	0.4	0	7.7	2.5	171	-7.6	-48	15.5	2.6	3.1	3.5	3.7	10.8	10.4	22.8	34.2	40.9	3.273	3.065	3.711	4.377	5.587	8.321	12.028	18.051	32.274
16641	81	2019-06-04	1.93039e+06	5.60604e+06	19.1	4	9.3	1.4	81	6.9	8.9	0	0	19.5	0.08	0.13	0	0.3	0	7.6	2.3	169	-7.6	-48	14.6	3.1	3.9	5	10.3	19.6	21.9	34.4	46.8	55.5	2.292	2.763	3.108	4.295	5.732	8.266	11.956	18.113	32.358
16641	81	2019-09-17	1.93039e+06	5.60604e+06	18.5	4.2	9.5	1.4	79	6.9	7.9	0	0	19.8	0.08	0.13	0	0.3	0	7.8	2	165	-7.6	-48	14.7	3.1	3.9	5	10.1	18.8	21.1	36.1	48.6	58.2	1.725	2.264	3.198	4.33	6.705	8.622	12.325	18.483	32.358
16641	81	2019-12-19	1.93039e+06	5.60604e+06	19.5	4.4	9.6	1.4	81	6.9	8.4	0	0	22	0.08	0.13	0	0.3	0	7.6	1.9	169	-7.6	-48	15.4	3.1	3.7	4.2	5.7	13.9	14.5	31.5	46.7	56.3	1.52	1.521	2.529	3.284	5.572	7.668	10.713	16.893	31.9
16641	81	2020-03-19	1.93039e+06	5.60604e+06	18.7	4.1	9.6	1.4	81	6.7	9	0	0	22	0.08	0.13	0	0.6	0	7.6	2.3	169	-7.6	-48	15.5	2.9	3.7	4.6	5.1	13.1	13.2	27.4	38.3	46.4	2.429	2.643	3.108	4.342	5.587	8.256	11.978	18.056	32.274
16641	81	2020-06-23	1.93039e+06	5.60604e+06	19.3	4.4	9.9	1.4	82	6.8	8.7	0	0	21	0.08	0.13	0	0.3	0	7.6	2.2	171	-7.6	-48	14.7	3.3	4.1	5.4	10	19.9	22.2	38.3	51.6	61.1	2.502	2.761	3.108	4.344	6.005	8.334	11.956	18.098	32.25
16758	82	2018-09-04	1.92675e+06	5.59933e+06	52	11.6	26	5.2	200	43	18.8	0.3	0.3	35	0.08	0.13	0.2	0	0.8	7.7	0.1	490	-7.6	-48	14.4	66.7	65.7	62.7	63.4	71.1	79.6	89.4	95.5	99	25.914	29.155	31.511	37.595	42.456	53.731	64.589	78.916	88.103
16758	82	2018-12-04	1.92675e+06	5.59933e+06	53	12.8	27	5.5	200	45	18.3	0.3	0.3	35	0.08	0.13	0.2	0.1	0.8	7.8	0.1	491	-7.6	-48	15.1	69.6	68.6	63.9	61.2	67.5	77.6	87.9	94	98.4	25.767	29.176	31.434	37.344	42.524	53.894	64.668	78.922	88.079
16758	82	2019-06-04	1.92675e+06	5.59933e+06	56	13.1	28	5.4	200	43	18.4	0.3	0.3	35	0.08	0.13	0.2	0.1	0.8	7.7	0.2	493	-7.6	-48	14.5	65	64.1	59.5	62.9	69.7	80.8	89.8	96.5	100.4	23.182	29.176	31.511	37.768	41.988	53.756	64.589	78.943	88.083
16758	82	2019-09-17	1.92675e+06	5.59933e+06	53	13	27	5.4	198	44	17.5	0.3	0.3	33	0.08	0.13	0.2	0.4	0.8	7.8	0.1	486	-7.6	-48	14.5	65.7	64.4	64.3	63.1	70.4	80.9	87.9	94.1	97.6	25.779	29.177	31.511	37.595	41.988	53.74	64.589	78.916	88.064
16758	82	2019-12-18	1.92675e+06	5.59933e+06	54	13.8	25	5.5	200	45	17.8	0.4	0.3	36	0.08	0.13	0.2	0.1	0.8	7.7	-0.1	471	-7.6	-48	14.8	37.7	39.8	49.6	53	64.6	71.2	84.2	89.8	95.6	26.206	29.174	31.449	37.282	42.156	53.996	64.589	78.919	88.064
16758	82	2020-03-18	1.92675e+06	5.59933e+06	53	13.1	25	5.3	200	44	18.9	0.2	0.3	35	0.08	0.13	0.2	0	0.8	7.7	-0.2	473	-7.6	-48	14.7	42.5	43.3	53.4	54.8	66.1	72.7	83.9	90.2	95.2	26.335	29.151	31.449	37.297	42.624	53.731	64.589	78.919	88.103
16758	82	2020-06-22	1.92675e+06	5.59933e+06	52	12.8	26	5.4	200	44	18.7	0.2	0.3	36	0.08	0.13	0.2	0.1	0.7	7.5	-0.2	484	-7.6	-48	14.6	42.6	41.5	54.2	56.4	66.2	74.6	85.5	91.1	96.4	26.385	29.173	31.449	37.449	43.991	53.74	64.589	78.919	88.064
705	21	2010-12-14	1.93039e+06	5.60741e+06	17.7	3.6	8.9	1.9	86	6.9	2.4	0.1	0.1	29	0.08	0.13	0.1	0	0.3	7.8	0.2	164	-7.6	-48	15	33.4	36.4	31.6	38.6	38.2	39.3	45.9	52.6	58.1	30.882	32.191	32.887	34.346	43.48	54.822	64.466	79.042	87.932
705	21	2011-03-09	1.93039e+06	5.60741e+06	17.4	3.6	8.8	1.8	87	6.6	2.6	0.1	0.1	30	0.08	0.13	0.1	0	0.3	7.8	0.3	165	-7.6	-48	15	25.6	28.3	29.7	37.8	37	37.8	43.8	50.8	57	30.891	32.192	32.887	34.332	43.48	54.829	64.466	79.045	87.899
705	21	2011-06-09	1.93039e+06	5.60741e+06	17.2	3.8	8.7	1.7	87	5.9	4	0.1	0.1	30	0.08	0.13	0.1	0	0.3	7.9	1	163	-7.6	-48	14.6	7.6	10.2	23.4	37.8	39.3	41.2	55.9	66.8	75.2	30.707	31.113	33.245	34.373	44.411	55.183	64.794	78.617	87.913
705	21	2012-03-07	1.93039e+06	5.60741e+06	17	3.6	8.9	1.8	95	6.6	2.8	0.1	0.1	27	0.08	0.13	0.1	0	0.3	7.8	0.3	159	-7.6	-48	14.8	26	28.6	29.1	37.1	37	40	49.2	57.5	65.1	30.764	32.174	32.887	34.312	41.88	54.922	64.387	79.043	87.899
705	21	2012-09-25	1.93039e+06	5.60741e+06	17.6	3.7	9.8	2	86	6.2	3.3	0.1	0.1	29	0.08	0.13	0.1	0	0.3	7.8	0.2	160	-7.6	-48	14.8	31.5	33.6	32.6	37.7	38.4	38.8	48.8	56.7	62.8	31.498	32.191	32.871	34.321	43.48	55.259	64.486	79.046	87.899
705	21	2012-12-11	1.93039e+06	5.60741e+06	18	3.6	9.6	1.9	86	6.9	2.8	0.2	0.1	30	0.08	0.13	0.1	0	0.3	7.8	0.1	163	-7.6	-48	14.8	39.4	41.7	35.2	42	39.9	43.3	50.1	56.7	62.9	37.244	32.191	36.913	34.505	43.791	54.85	63.504	69.782	77.839
705	21	2013-08-21	1.93039e+06	5.60741e+06	17.5	3.5	9.4	1.9	86	6.2	3	0.1	0.1	29	0.08	0.13	0.1	0	0.3	7.8	0.4	165	-7.6	-48	14.6	26.2	29.5	29.7	38.8	39.6	43.8	52	59.6	67.6	30.83	31.122	32.656	34.363	43.532	55.123	64.965	79.046	87.913
705	21	2013-12-11	1.93039e+06	5.60741e+06	17.9	3.7	10.4	2.1	88	6	2.6	0.1	0.1	30	0.08	0.13	0.1	0.5	0.3	7.8	0.3	161	-7.6	-48	14.5	26.2	29.7	32.7	39.8	42	46	49.8	56.7	62.3	31.35	32.206	32.997	34.612	42.864	54.93	64.315	79.108	87.917
705	21	2014-03-11	1.93039e+06	5.60741e+06	17.6	3.4	10.6	2.1	87	6.3	2.7	0	0.1	30	0.08	0.13	0.1	0.4	0.3	7.7	0.3	164	-7.6	-48	14.7	25.8	29.1	31.7	39.7	40.3	43.2	47.6	52.5	58.6	29.977	32.189	32.877	34.315	43.012	54.957	64.382	79.333	87.91
705	21	2014-06-19	1.93039e+06	5.60741e+06	17.2	3.7	9.4	1.9	87	6.2	2.8	0.1	0.1	29	0.08	0.13	0.1	0	0.4	7.8	0.2	162	-7.6	-48	14.5	35	37.7	33.9	40.1	40.7	43.9	49.3	55.9	60.7	32.262	31.795	32.997	34.611	43.332	54.802	64.216	78.846	87.899
705	21	2014-09-11	1.93039e+06	5.60741e+06	16.5	3.5	9.6	1.8	86	5.7	2.8	0.2	0.1	30	0.08	0.13	0.1	0	0.3	7.7	0.3	162	-7.6	-48	14.5	24.7	27.6	29.6	37.4	40.7	45.1	51.4	58.6	64.9	30.909	32.182	32.896	34.616	43.332	54.941	64.387	79.047	87.899
705	21	2014-12-03	1.93039e+06	5.60741e+06	17.9	4.1	10.4	2.1	86	5.9	3	0.1	0.1	31	0.08	0.13	0.1	0	0.3	7.7	0.3	163	-7.6	-48	14.6	26.9	29.7	32.4	38.1	41.5	42.6	51	58.2	64	31.193	32.202	32.871	34.318	43.48	54.95	64.486	79.298	87.957
705	21	2015-03-04	1.93039e+06	5.60741e+06	16.8	3.5	9	1.8	88	5.6	2.1	0.1	0.1	30	0.08	0.13	0.1	0	0.3	7.8	0.1	162	-7.6	-48	14.7	37.1	39.5	32.2	38.5	37.6	40.8	45	50.5	55.9	37.04	32.165	36.972	34.474	43.791	54.912	63.504	69.818	77.58
705	21	2015-06-17	1.93039e+06	5.60741e+06	17.8	3.7	11	2.1	87	6	2.9	0	0.1	30	0.08	0.13	0.1	0.1	0.3	7.5	0.3	163	-7.6	-48	14.5	24.8	28.7	31.1	37.8	40.7	42.8	47.5	55.5	59.6	30.316	32.19	33.003	34.768	44.393	54.929	64.211	78.932	87.91
705	21	2015-09-09	1.93039e+06	5.60741e+06	18.4	4	10.5	2	86	6	2.6	0.1	0.1	31	0.08	0.13	0.1	0	0.4	7.5	0.3	162	-7.6	-48	14.6	26.3	29	32	36.6	40	41.6	47.3	53.2	59.9	32.595	31.762	32.871	34.472	45.009	54.83	64.486	79.117	87.957
705	21	2015-12-01	1.93039e+06	5.60741e+06	17.7	3.6	8.7	1.9	86	6.2	2	0.1	0.1	29	0.08	0.13	0.1	0	0.3	7.7	0.2	163	-7.6	-48	14.6	31.9	33.3	32.4	39.5	39.4	43.7	51.1	58.2	65.5	30.917	32.177	32.871	34.29	43.48	54.956	64.387	79.039	87.899
2580	12	2015-12-02	1.9357e+06	5.60442e+06	33	3.8	11.7	1.8	105	10.7	15.6	0	0	14.7	0.08	0.13	0	0.9	0	7	4.7	243	-7.6	-48	15.5	2.4	2.7	4.2	4.9	7.3	7.8	7.4	6.1	11.4	0.917	1.131	1.863	2.498	4.524	4.713	6.416	19.969	19.806
2580	12	2016-05-06	1.9357e+06	5.60442e+06	28	3.3	11.5	1.6	96	10.2	10.8	0	0	15.3	0	0.1	0	0.3	0	6.8	4.4	208	-7.6	-48	14.8	2.5	3.2	4.8	8.8	11.4	12.9	14.2	16.9	21.5	0.263	0.112	0.536	0.179	3.374	3.604	4.991	4.743	6.835
5988	8	2011-04-11	1.92414e+06	5.60275e+06	52	15	38	3.1	210	50	24	0	0	20	0.08	0.13	0	6.7	0	7.3	0.3	565	-7.6	-48	15.2	7.1	9.1	15.9	20.5	21.4	24.6	35.2	45.2	53.3	6.132	10.596	17.785	19.583	22.581	31.231	39.477	53.455	63.028
10496	18	2011-03-09	1.93514e+06	5603000	64	7	25	2.8	194	31	30	0.1	0	23	0.08	0.13	0	3.3	0	7.2	0.6	484	-7.6	-48	15.4	7	8.9	15.7	17.5	18.5	23.9	31.4	38.7	47.8	2.149	2.872	4.839	8.335	13.562	29.072	39.027	50.538	60.35
10496	18	2011-06-09	1.93514e+06	5603000	63	7.6	21	2.2	200	27	29	0	0	21	0.08	0.13	0	3.3	0	7.1	2.7	492	-7.6	-48	15.2	5	8	12.1	13	14.4	20.8	27.6	35.7	45.6	2.779	3.027	4.839	7.713	13.232	30.453	40.787	54.045	64.925
10496	18	2011-09-27	1.93514e+06	5603000	67	8.2	23	2.3	196	31	34	0	0	21	0.08	0.13	0	3.2	0	6.9	1	472	-7.6	-48	15.3	7.1	9	15.5	19.3	19.7	28.6	39.5	48.3	59	2.66	2.641	4.137	4.749	9.487	9.77	12.853	17.369	20.779
10496	18	2011-12-07	1.93514e+06	5603000	66	6.8	25	2.7	199	34	33	0	0	22	0.08	0.13	0	3.3	0	6.9	0.8	484	-7.6	-48	14.8	7.1	9.2	15	16.9	21.8	29.6	34.9	42.2	52.5	2.776	3.076	4.839	7.705	12.955	30.471	40.999	54.054	64.925
10496	18	2012-03-06	1.93514e+06	5603000	60	6	23	3.1	200	36	28	0	0	22	0.08	0.13	0.1	3.5	0	7	0.7	493	-7.6	-48	15.3	12.7	17	24.7	26.3	30.5	46.2	55.6	66.7	77	9.088	14.162	17.64	20.021	21.616	31.373	39.352	53.819	64.444
10496	18	2012-06-19	1.93514e+06	5603000	70.5	7.5	25	2.6	210	29.5	29	0	0	21.5	0.08	0.13	0	3.2	0	7	1	486	-7.6	-48	15.1	6.7	8.4	15.4	19.6	21.6	30.3	39.2	48	57.2	2.779	3.025	4.839	7.71	13.248	30.454	40.888	54.053	64.925
10496	18	2012-06-20	1.93514e+06	5603000	30	4.5	19.3	1.8	112	23	11.5	0.1	0	17	0.08	0.13	0	2.1	0	8	0.1	259	-7.6	-48	15.1	12.4	17.2	16.5	21.1	24	19.9	22.2	25.5	30.5	1.106	1.352	2.302	3.044	15.031	30.538	39.706	55.21	63.522
10496	18	2012-09-24	1.93514e+06	5603000	68	6.9	22	2.3	210	28	28	0	0	21	0.08	0.13	0	3.1	0	6.9	0.8	471	-7.6	-48	15.2	6.9	8.7	13.4	14.1	15.8	25.9	36.5	45.1	56.5	2.779	3.023	4.839	7.707	12.955	30.453	40.787	54.045	64.925
10496	18	2012-12-11	1.93514e+06	5603000	67	7	25	2.6	210	32	30	0	0	22	0.08	0.13	0	2.9	0	7	17.4	496	-7.6	-48	15.4	5.6	8.3	12.5	10.2	13.3	17.3	22	28	35.2	2.638	2.636	4.137	4.77	9.057	9.279	12.505	14.992	19.287
10496	18	2013-08-27	1.93514e+06	5603000	71	7.2	26	2.8	210	29	29	0	0	22	0.08	0.13	0	2.8	0	7	1	502	-7.6	-48	15	7	9.6	15.7	20.5	25.3	31.2	39.2	47.9	56.9	2.776	3.025	4.839	7.709	13.248	30.43	40.888	54.054	64.925
10496	18	2013-12-09	1.93514e+06	5603000	63	6.3	25	2.7	210	29	28	0	0	23	0.08	0.13	0	3.3	0	7.1	1.1	492	-7.6	-48	15.2	6.9	9.3	13.9	17.6	21.3	28.9	35.8	43	53	2.413	2.644	4.149	4.751	9.487	9.771	12.853	17.596	20.786
10496	18	2014-03-10	1.93514e+06	5603000	67	6.9	27	3.5	220	33	30	0	0	24	0.08	0.13	0	2.5	0	7.1	0.6	501	-7.6	-48	15.7	8.1	9.6	13.6	17.1	18.8	23.2	29.2	36	44.7	2.408	2.63	4.137	4.849	9.433	9.765	12.922	17.604	20.786
10496	18	2014-06-18	1.93514e+06	5603000	72	7.9	26	3.2	220	37	35	0	0	23	0.08	0.13	0	2.7	0	7.1	0.6	541	-7.6	-48	15.8	8.3	10.1	16.4	19.1	19.7	23.7	29.4	36.4	44	2.408	2.63	4.137	4.746	9.464	9.767	12.922	17.604	20.786
10496	18	2014-09-10	1.93514e+06	5603000	69	8.3	31	2.9	200	40	37	0	0	23	0.08	0.13	0	4.4	0	6.9	0.6	540	-7.6	-48	14.7	8.1	11.2	17.1	20.7	24.2	32.4	38.6	46.6	55.5	2.958	3.144	4.891	7.705	13.253	30.609	40.999	54.001	64.87
10496	18	2014-12-05	1.93514e+06	5603000	70	7.9	33	3.4	210	35	34	0	0	24	0.08	0.13	0	3.2	0	7.2	0.4	516	-7.6	-48	14.6	12.8	20.3	19.2	22.3	26.1	32.4	37.8	46.2	53.4	2.999	3.142	4.94	30.378	40.005	53.976	67.08	79.727	87.994
10496	18	2015-03-06	1.93514e+06	5603000	62	9.5	33	7.3	220	31	31	0.1	0.1	25	0.08	0.13	0.1	1.5	0	6.9	0.2	496	-7.6	-48	15.2	29	30.1	29.5	25.2	26.1	37.4	42.5	55.4	61.2	10.449	14.759	23.093	26.537	36.22	40.198	48.488	58.174	66.288
10496	18	2015-07-03	1.93514e+06	5603000	64	6.7	21	2.7	210	29	27	0	0	22	0.08	0.13	0	2.2	0	7.1	0.7	479	-7.6	-48	14.7	7.1	10.1	14.9	19.7	24.6	30.9	39.4	47.9	57.1	3.184	3.183	4.077	4.523	9.806	9.789	12.853	17.493	20.785
10496	18	2015-09-08	1.93514e+06	5603000	70	7.6	25	2.8	230	33	25	0	0	24	0.08	0.13	0	2.2	0	7	0.7	515	-7.6	-48	15	7	9.7	15.9	19	23.9	31.1	38.2	46.5	55.8	2.018	2.111	3.322	4.26	9.487	9.776	12.853	17.742	20.787
10496	18	2015-12-02	1.93514e+06	5603000	66	7.5	25	2.7	210	28	26	0	0	22	0.08	0.13	0	2.3	0	6.8	0.2	486	-7.6	-48	15.1	12.9	17.2	17.5	18.8	21.5	24.5	31.7	40.4	47.4	6.175	10.6	19.202	21.527	24.371	31.281	39.366	53.456	62.829
10496	18	2015-12-14	1.93514e+06	5603000	77	8.7	28	3.1	240	41	23	0	0	27	0.08	0.13	0	1.5	0	6.8	0.3	552	-7.6	-48	15	13	18.7	20.5	24.4	26.8	34.4	40.4	49.1	57.4	4.317	6.407	15.982	20.373	22.51	31.233	40.833	53.464	62.534
10496	18	2016-08-18	1.93514e+06	5603000	73	8.1	25	3.8	191	50	48	0	0.1	24	0.08	0.13	0	3.6	0	6.8	0.3	569	-7.6	-48	14.6	26.1	29.7	25.9	29.1	31.2	39.8	39.1	47.6	52.7	8.551	13.356	19.389	21.931	24.637	27.224	36.083	45.89	52.792
10496	18	2016-08-23	1.93514e+06	5603000	61	6.3	23	2.7	200	30	30	0	0	22	0.08	0.13	0	2.1	0	6.9	0.2	478	-7.6	-48	15.3	12.9	17.3	17.4	17.9	21.3	24	28.9	35.3	42.3	4.59	6.68	15.896	19.86	22.581	31.265	40.396	53.447	62.765
10496	18	2016-09-14	1.93514e+06	5603000	64	6.5	22	2.9	187	37	36	0	0	24	0.08	0.13	0	4.3	0	6.9	0.1	496	-7.6	-48	15	14.9	19.2	18.8	22.1	24.5	29.3	33.1	40.2	47.6	9.458	12.527	19.202	21.786	24.371	31.285	39.324	53.389	61.964
